# Supplementary material for: A practical and effective method for the N–N bond cleavage of N-amino-heterocycles
Source: Royal Society of Chemistry journal article supplement (doi:10.1039/c9qo00895k), 2019-01-01
Supplement: c9qo00895k1.pdf [file c9qo00895k1.pdf]

# A Practical and Effective Method for the N–N-bond cleavage of *N*-Amino-heterocycles

Giacomo Mari, Gianfranco Favi, Stefania Santeusano, Fabio Mantellini,\* and Lucia De Crescentini\*

*Department of Biomolecular Sciences, Section of Organic Chemistry and Organic Natural  
Compounds, University of Urbino “Carlo Bo”, Via I Maggetti 24, 61029 Urbino (PU), Italy*

*e-mail: fabio.mantellini@uniurb.it*

## SUPPORTING INFORMATION

### Table of Contents

|                                                                                                                                                                                                                                  |    |
|----------------------------------------------------------------------------------------------------------------------------------------------------------------------------------------------------------------------------------|----|
| 1. General Information                                                                                                                                                                                                           | 3  |
| 2. Synthesis of <i>N</i> -alkylated-1-amino-1 <i>H</i> -pyrrole <b>3a</b> and <i>N</i> -alkylated-1 <i>H</i> -pyrrole <b>5a</b><br>by treatment of 1-amino-1 <i>H</i> -pyrrole <b>1a</b> with Magnus' conditions.                | 3  |
| 3. Spectral data of <i>N</i> -alkylated-1 <i>H</i> -pyrrole <b>3a</b> and <i>N</i> -alkylated-1 <i>H</i> -pyrrole <b>5a</b> .                                                                                                    | 3  |
| 4. <sup>1</sup> H and <sup>13</sup> C spectra of <i>N</i> -alkylated-1 <i>H</i> -pyrrole <b>3a</b> and <i>N</i> -alkylated-1 <i>H</i> -pyrrole <b>5a</b> .                                                                       | 5  |
| 5. General procedure for the synthesis of <i>N</i> -alkylated-1-amino-1 <i>H</i> -pyrrole <b>6a</b> and<br>1 <i>H</i> -pyrroles <b>4a–l</b> by basic treatment of 1-amino-1 <i>H</i> -pyrroles <b>1a–m</b> and DDs <b>2a,b</b> . | 11 |
| 6. Spectral data of <i>N</i> -alkylated-1-amino-1 <i>H</i> -pyrrole <b>6a</b> and 1 <i>H</i> -pyrroles <b>4a–l</b> .                                                                                                             | 11 |
| 7. <sup>1</sup> H and <sup>13</sup> C spectra of <i>N</i> -alkylated-1-amino-1 <i>H</i> -pyrrole <b>6a</b> and 1 <i>H</i> -pyrroles <b>4a–l</b> .                                                                                | 15 |
| 8. General procedure for the synthesis of 1 <i>H</i> -pyrrol-2-ones <b>10a–e</b><br>by basic treatment of 1-amino-1 <i>H</i> -pyrrol-2-ones <b>9a–e</b> and DD <b>2a</b> .                                                       | 30 |
| 9. Spectral data of 1 <i>H</i> -pyrrol-2-ones <b>10a–e</b> .                                                                                                                                                                     | 30 |
| 10. <sup>1</sup> H and <sup>13</sup> C spectra of 1 <i>H</i> -pyrrol-2-ones <b>10a–e</b> .                                                                                                                                       | 32 |
| 11. General procedure for the synthesis of 1 <i>H</i> -imidazoles <b>12a–c</b> by<br>basic treatment of 1-amino-1 <i>H</i> -imidazoles <b>11a–c</b> and DD <b>2a</b> .                                                           | 37 |
| 12. Spectral data of 1 <i>H</i> -imidazoles <b>12a–c</b> .                                                                                                                                                                       | 37 |
| 13. <sup>1</sup> H and <sup>13</sup> C spectra of 1 <i>H</i> -imidazoles <b>12a–c</b> .                                                                                                                                          | 38 |
| 14. General procedure for the synthesis of thiazoles <b>14a–d</b> by basic<br>treatment of 3-amino-2,3-dihydrothiazoles <b>13a–d</b> and DD <b>2a</b> .                                                                          | 41 |

|     |                                                                                                                                                                                                             |    |
|-----|-------------------------------------------------------------------------------------------------------------------------------------------------------------------------------------------------------------|----|
| 15. | Spectral data of thiazoles <b>14a–d</b> .                                                                                                                                                                   | 41 |
| 16. | <sup>1</sup> H and <sup>13</sup> C spectra of thiazoles <b>14a–d</b> .                                                                                                                                      | 43 |
| 17. | Synthesis of <i>N</i> -dialkylated 1-amino-1 <i>H</i> -bis-pyrrol-2-one <b>15a</b><br>by treatment of 1-amino-1 <i>H</i> -bis-pyrrole <b>9a</b> under Magnus' conditions.                                   | 47 |
| 18. | Spectral data of <i>N</i> -dialkylated 1-amino-1 <i>H</i> -bis-pyrrol-2-one <b>15a</b> .                                                                                                                    | 47 |
| 19. | <sup>1</sup> H and <sup>13</sup> C spectra of <i>N</i> -dialkylated 1-amino-1 <i>H</i> -bis-pyrrol-2-one <b>15a</b> .                                                                                       | 47 |
| 20. | Synthesis of 1 <i>H</i> -imidazole <b>12a</b> , by treatment of 1-amino-1 <i>H</i> -imidazole <b>11a</b><br>under Magnus' conditions.                                                                       | 49 |
| 21. | Synthesis of <i>N</i> -alkylated 2,3-dihydrothiazole <b>16a</b> and of <i>N</i> -alkylated 2-aminothiazole<br><b>17a</b> , by treatment of 3-amino-2,3-dihydrothiazole <b>13a</b> under Magnus' conditions. | 49 |
| 22. | Spectral data of <i>N</i> -alkylated 2,3-dihydrothiazole <b>16a</b> and of <i>N</i> -alkylated<br>2-aminothiazole <b>17a</b> .                                                                              | 49 |
| 23. | <sup>1</sup> H and <sup>13</sup> C spectra of <i>N</i> -alkylated 2,3-dihydrothiazole <b>16a</b> and of <i>N</i> -alkylated<br>2-aminothiazole <b>17a</b> .                                                 | 51 |
| 24. | References                                                                                                                                                                                                  | 53 |

**1. General information.** All the commercially available reagents and solvents were used without further purification. 1,2-Diaza-1,3-dienes **2a,b** were synthesized as a mixture of *E/Z* isomers as previously reported.<sup>1,2</sup> Chromatographic purification of compounds was carried out on silica gel (60–200  $\mu\text{m}$ ). TLC analysis was performed on pre-loaded (0.25 mm) glass supported silica gel plates (Kieselgel 60); compounds were visualized by exposure to UV light and by dipping the plates in 1%  $\text{Ce}(\text{SO}_4)\cdot 4\text{H}_2\text{O}$ , 2.5%  $(\text{NH}_4)_6\text{Mo}_7\text{O}_{24}\cdot 4\text{H}_2\text{O}$  in 10% sulphuric acid followed by heating on a hot plate. All  $^1\text{H}$  NMR and  $^{13}\text{C}$  NMR spectra were recorded at 400 and 100.56 MHz, respectively. Proton and carbon spectra were referenced internally to solvent signals, using values of  $\delta = 2.50$  ppm for proton (middle peak) and  $\delta = 39.50$  ppm for carbon (middle peak) in  $\text{DMSO}-d_6$  and  $\delta = 7.27$  ppm for proton and  $\delta = 77.00$  ppm for carbon (middle peak) in  $\text{CDCl}_3$ . The following abbreviations are used to describe peak patterns where appropriate: s = singlet, d = doublet, t = triplet, q = quartet, sex = sextet, m = multiplet and br = broad signal. All coupling constants (*J*) are given in Hz. FT-IR spectra were obtained as Nujol mulls. Mass spectra were obtained by ESI-MS analyses. Elemental analyses were within  $\pm 0.4$  of the theoretical values (C, H, N). Melting points were determined in open capillary tubes and are uncorrected.

**2. Synthesis of 1-amino-1*H*-pyrrole **3a** and 1*H*-pyrrole **5a** by treatment of 1-amino-1*H*-pyrrole **1a** with Magnus' conditions.** To a magnetically stirred solution of 1-amino-1*H*-pyrrole **1a** (0.5 mmol) in MeCN (10 mL), ethyl bromoacetate **7** (1.0 mmol) and  $\text{Cs}_2\text{CO}_3$  (1.25 mmol) were added and then the reaction mixture was refluxed for 18 hours, according to the Magnus' procedure. After this time, a TLC analysis revealed the disappearance of the starting reagent **1** and the formation 1-amino-1*H*-pyrrole **3a** and of 1*H*-pyrrole **5a**, in 52% and 39% yields, respectively. After the filtration of  $\text{Cs}_2\text{CO}_3$ , the solvent was removed in vacuo and the residue was purified by silica gel column chromatography using cyclohexane/ethyl acetate mixtures as eluent: product **3a** is oil, while product **5a** was crystallized from ethyl acetate/petroleum ether.

**3. Spectral data of 1-amino-1*H*-pyrrole **3a** and 1*H*-pyrrole **5a**.**

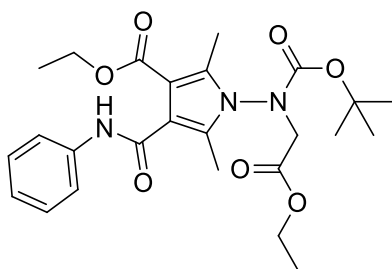

**Ethyl 1-((*tert*-butoxycarbonyl)(2-ethoxy-2-oxoethyl)amino)-2,5-dimethyl-4-(phenylcarbamoyl)-1*H*-pyrrole-3-carboxylate (**3a**).**

The compound was obtained as yellow oil (126.9 mg, 52%);  $^1\text{H}$  NMR (400 MHz,  $\text{CDCl}_3$ , 25  $^\circ\text{C}$ ):  $\delta = 1.25$ – $1.45$  (m, 6H,  $2\text{OCH}_2\text{CH}_3$ ), 1.38 and 1.49 (2s, 9H,  $\text{OC}(\text{CH}_3)_3$ ), 2.48 and 2.48 (2s, 3H,  $\text{CH}_3$ ), 2.53 and 2.55 (2brs, 3H,  $\text{CH}_3$ ), 4.06–4.11 (m, 1H,  $\text{OCH}_2\text{CO}$ ), 4.23 (q,  $J=7.2$  Hz, 2H,  $\text{OCH}_2\text{CH}_3$ ), 4.31–4.43 (m, 3H,  $\text{OCH}_2\text{CO}$  and  $\text{OCH}_2\text{CH}_3$ ), 7.05 (t,  $J=7.6$  Hz,  $1\text{H}_{\text{ar}}$ ), 7.29–7.33 (m,  $2\text{H}_{\text{ar}}$ ), 7.69–7.74 (m,  $2\text{H}_{\text{ar}}$ ), 11.40 and 11.64 (2brs, 1H, NH);  $^{13}\text{C}$

NMR (100 MHz, CDCl<sub>3</sub>, 25 °C):  $\delta$  = 11.2 (q), 11.4 (q), 11.9 (q), 12.1 (q), 14.0 (q), 14.1 (q), 14.1 (q), 52.6 (t), 53.8 (t), 60.9 (t), 61.0 (t), 61.6 (t), 83.4 (s), 84.0 (s), 107.4 (s), 107.7 (s), 114.2 (s), 114.6 (s), 119.9 (d), 119.9 (d), 123.2 (d), 128.6 (d), 136.8 (s), 137.2 (s), 137.4 (s), 137.5 (s), 139.2 (s), 152.4 (s), 153.1 (s), 162.6 (s), 162.7 (s), 167.2 (s), 167.3 (s), 167.4 (s), 167.6 (s); IR (nujol):  $\nu_{\max}$  = 3300, 1759, 1653, 1648, 1630 cm<sup>-1</sup>; MS  $m/z$  (ESI): 488.26 (M + H<sup>+</sup>); anal. calcd. for C<sub>25</sub>H<sub>33</sub>N<sub>3</sub>O<sub>7</sub> (487.55): C 61.59, H 6.82, N 8.62; found: C 61.47, H 6.88, N 8.69.

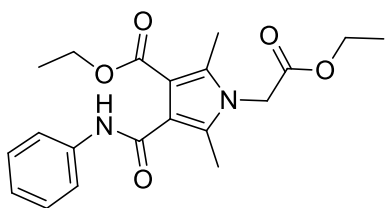

**Ethyl 1-(2-ethoxy-2-oxoethyl)-2,5-dimethyl-4-(phenylcarbamoyl)-1H-pyrrole-3-carboxylate (5a).** The compound was obtained as white solid (73.2 mg, 39%); mp: 90–92 °C; <sup>1</sup>H NMR (400 MHz, CDCl<sub>3</sub>, 25 °C):  $\delta$  = 1.30 (q,  $J=7.2$  Hz, 3H, OCH<sub>2</sub>CH<sub>3</sub>), 1.36 (q,  $J=7.2$  Hz, 3H, OCH<sub>2</sub>CH<sub>3</sub>), 2.46 (s, 3H, CH<sub>3</sub>), 2.57 (s, 3H, CH<sub>3</sub>), 4.26 (q,  $J=7.2$  Hz, 2H, OCH<sub>2</sub>CH<sub>3</sub>), 4.36 (q,  $J=7.2$  Hz, 2H, OCH<sub>2</sub>CH<sub>3</sub>), 4.62 (s, 2H, OCH<sub>2</sub>CO), 7.07 (t,  $J=7.2$  Hz, 1H<sub>ar</sub>), 7.33 (t,  $J=8.4$  Hz, 2H<sub>ar</sub>), 7.72 (d,  $J=7.6$  Hz, 2H<sub>ar</sub>), 11.11 (brs, 1H, NH); <sup>13</sup>C NMR (100 MHz, CDCl<sub>3</sub>, 25 °C):  $\delta$  = 11.9 (q), 12.6 (q), 14.1 (q), 14.3 (q), 45.2 (t), 60.9 (t), 62.2 (t), 109.6 (s), 116.2 (s), 120.0 (d), 123.3 (d), 128.7 (d), 136.0 (s), 136.4 (s), 139.3 (s), 163.4 (s), 167.3 (s), 167.6 (s); IR (nujol):  $\nu_{\max}$  = 3322, 1692, 1649, 1637 cm<sup>-1</sup>; MS  $m/z$  (ESI): 373.10 (M + H<sup>+</sup>); anal. calcd. for C<sub>20</sub>H<sub>24</sub>N<sub>2</sub>O<sub>5</sub> (372.42): C 64.50, H 6.50, N 7.52; found: C 64.62, H 6.54, N 7.47.

4.  $^1\text{H}$  and  $^{13}\text{C}$  spectra of 1-amino-1*H*-pyrrole 3a and 1*H*-pyrrole 5a.

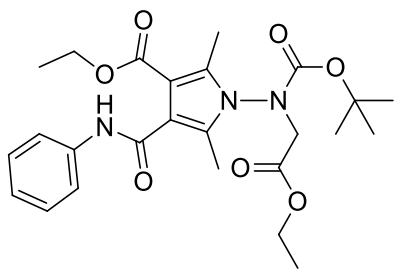

Ethyl 1-((*tert*-butoxycarbonyl)(2-ethoxy-2-oxoethyl)amino)-2,5-dimethyl-4-(phenylcarbamoyl)-1*H*-pyrrole-3-carboxylate (3a).

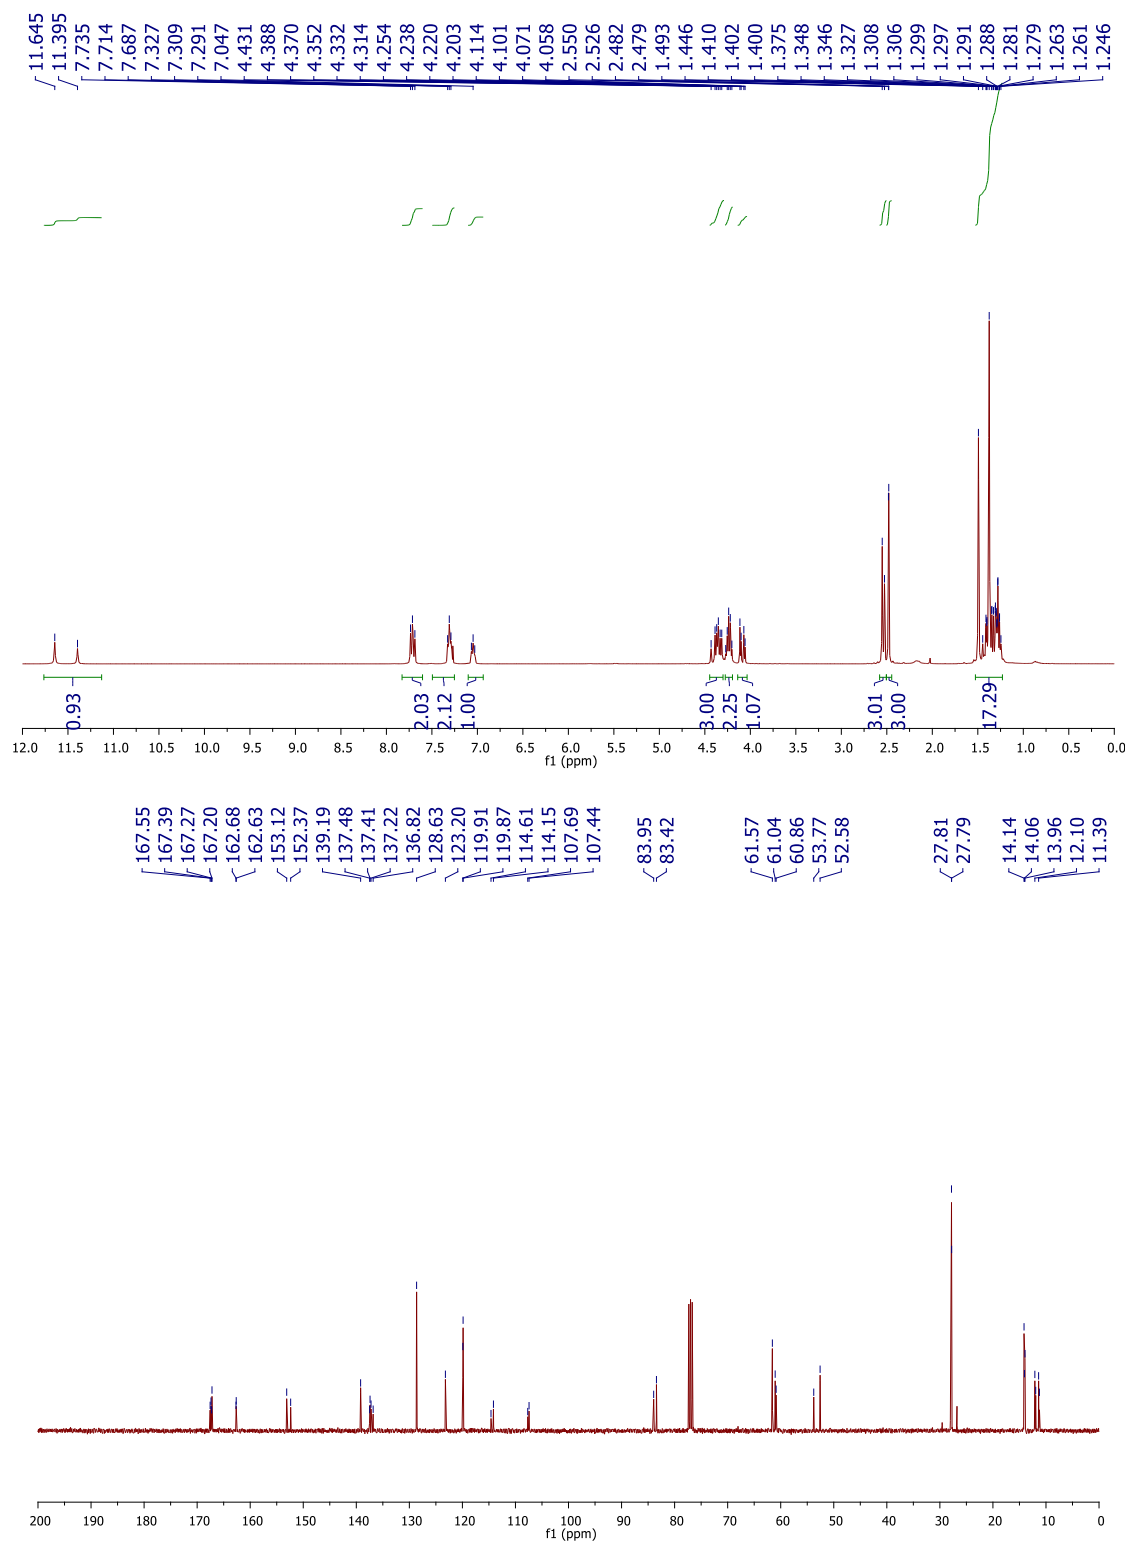

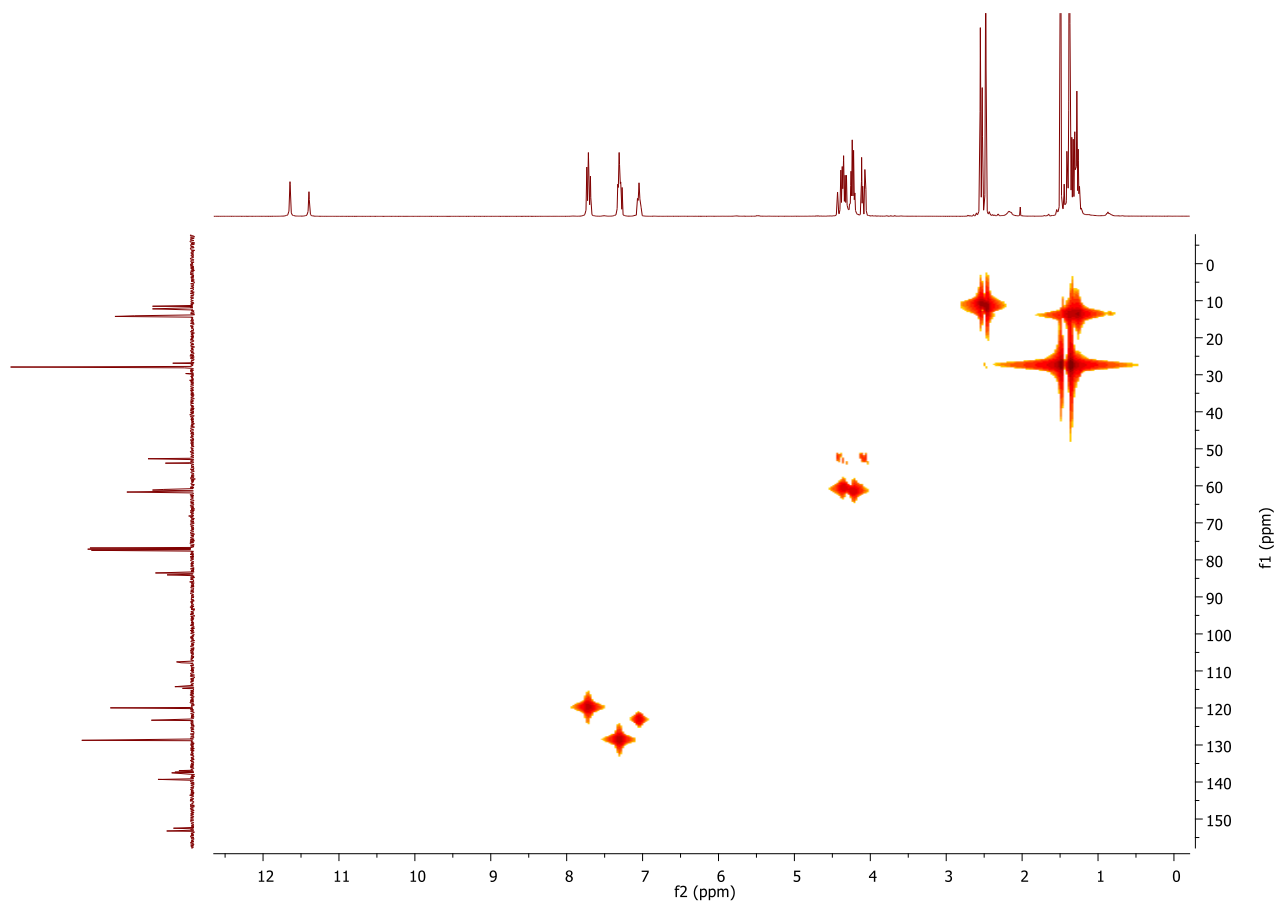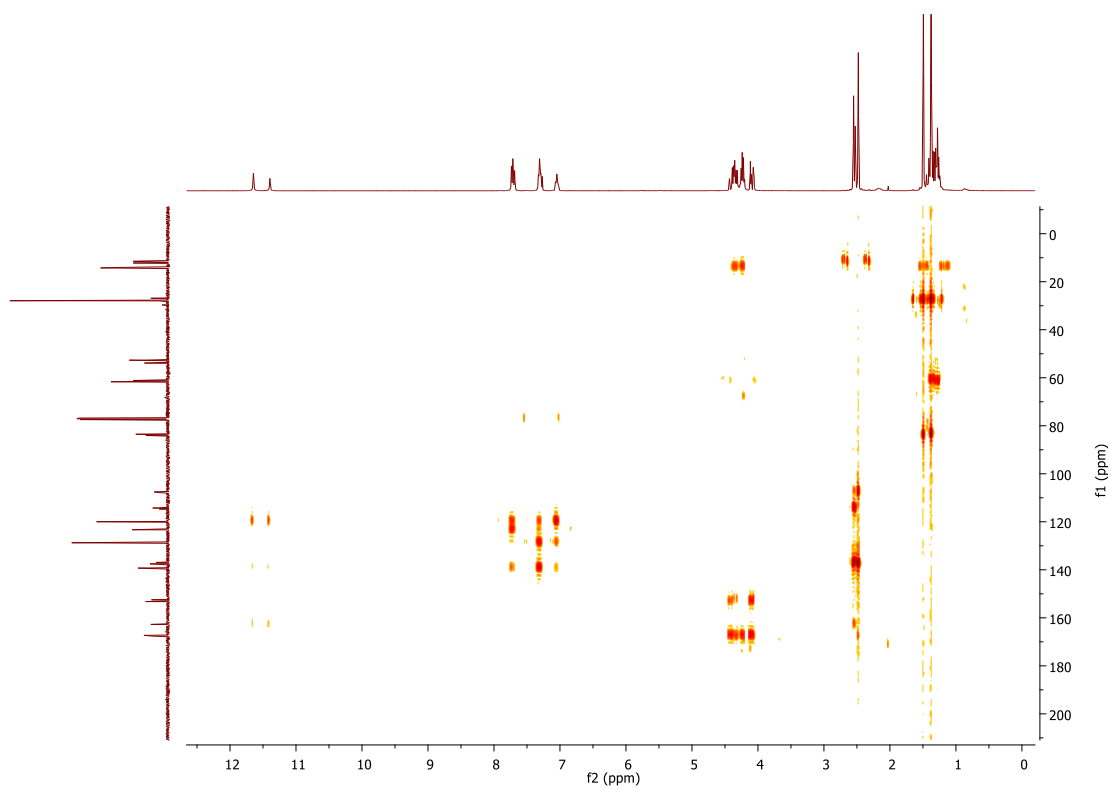

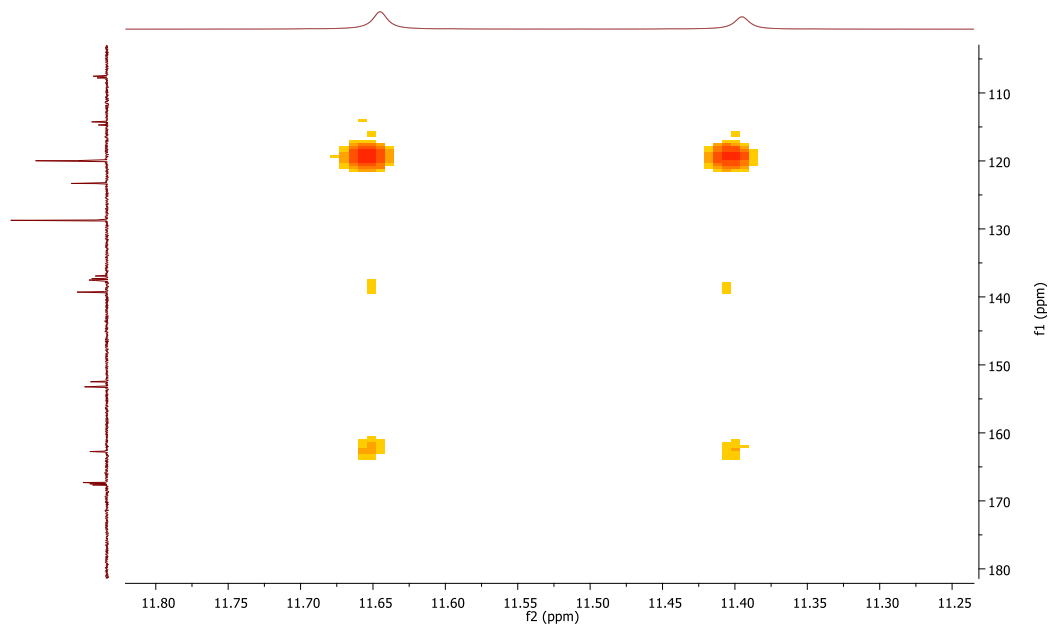

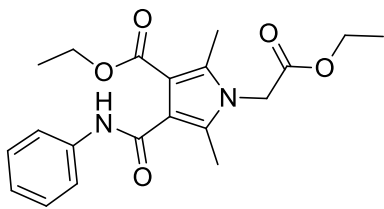

**Ethyl 1-(2-ethoxy-2-oxoethyl)-2,5-dimethyl-4-(phenylcarbamoyl)-*1H*-pyrrole-3-carboxylate (5a).**

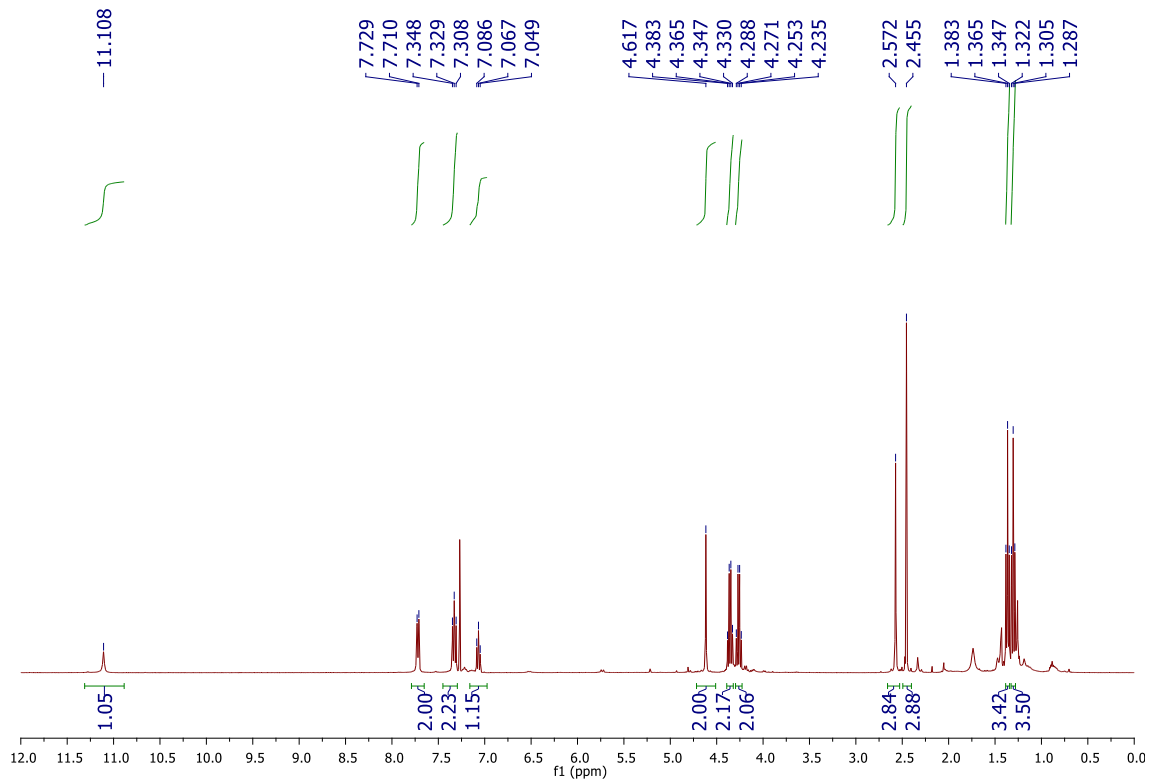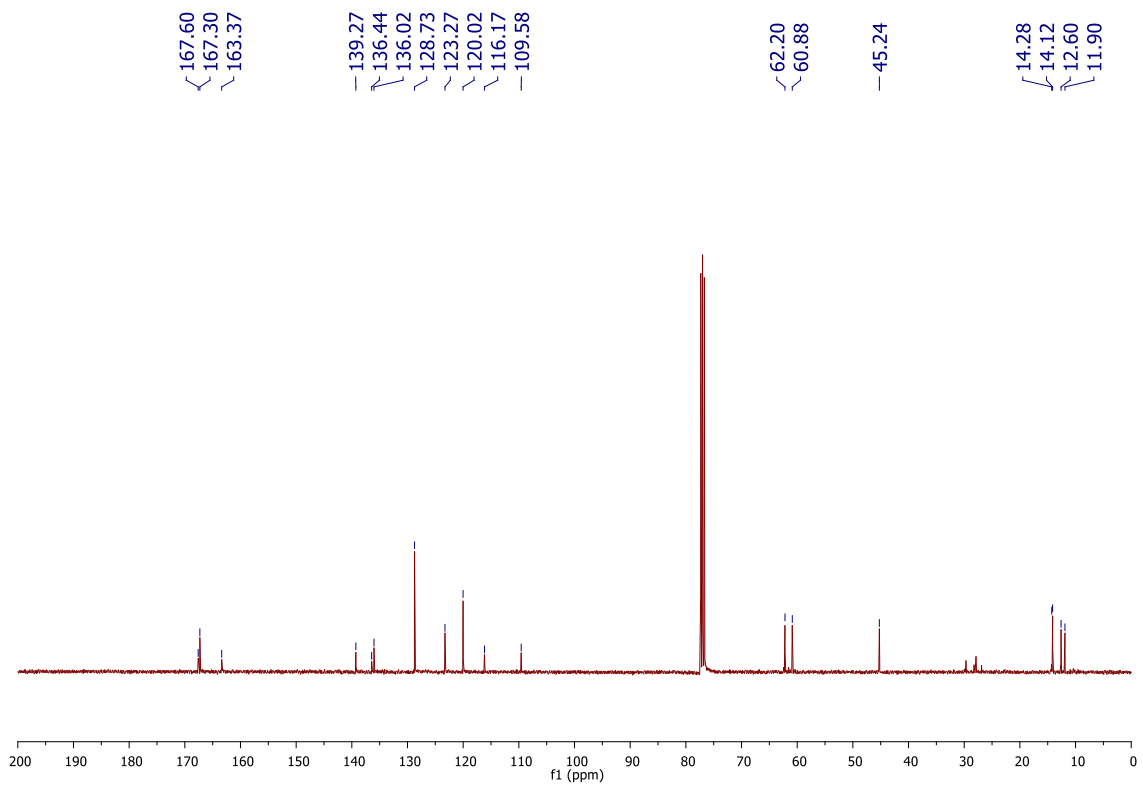



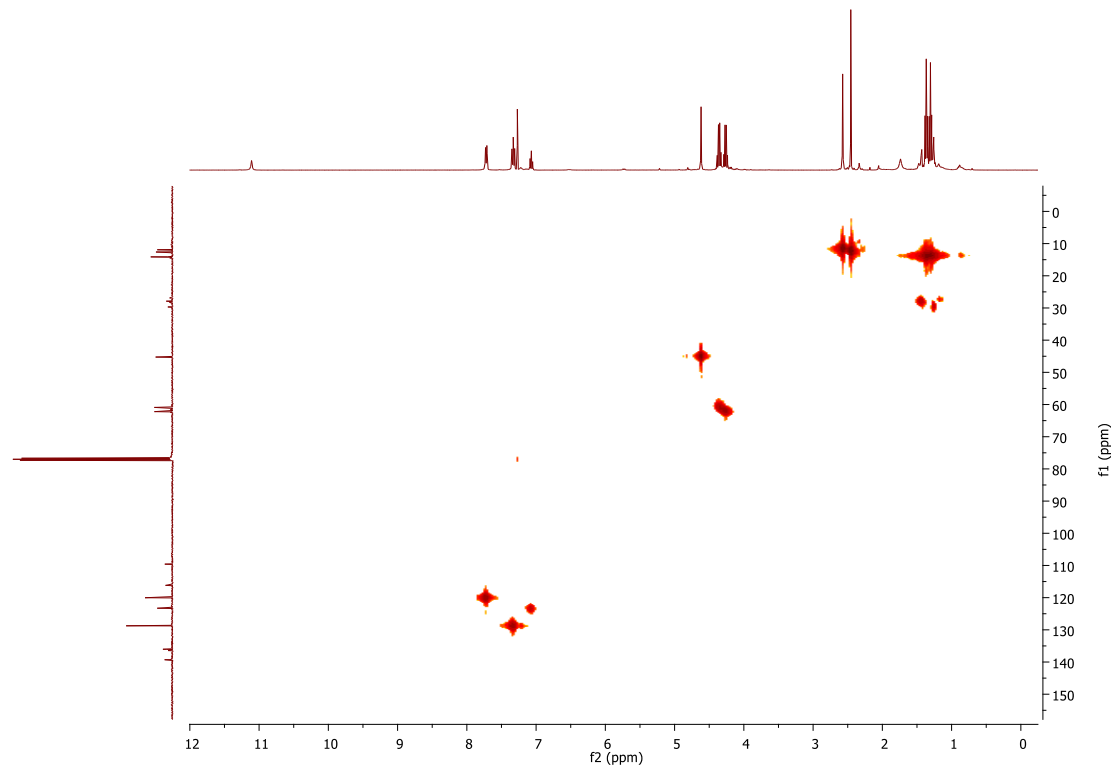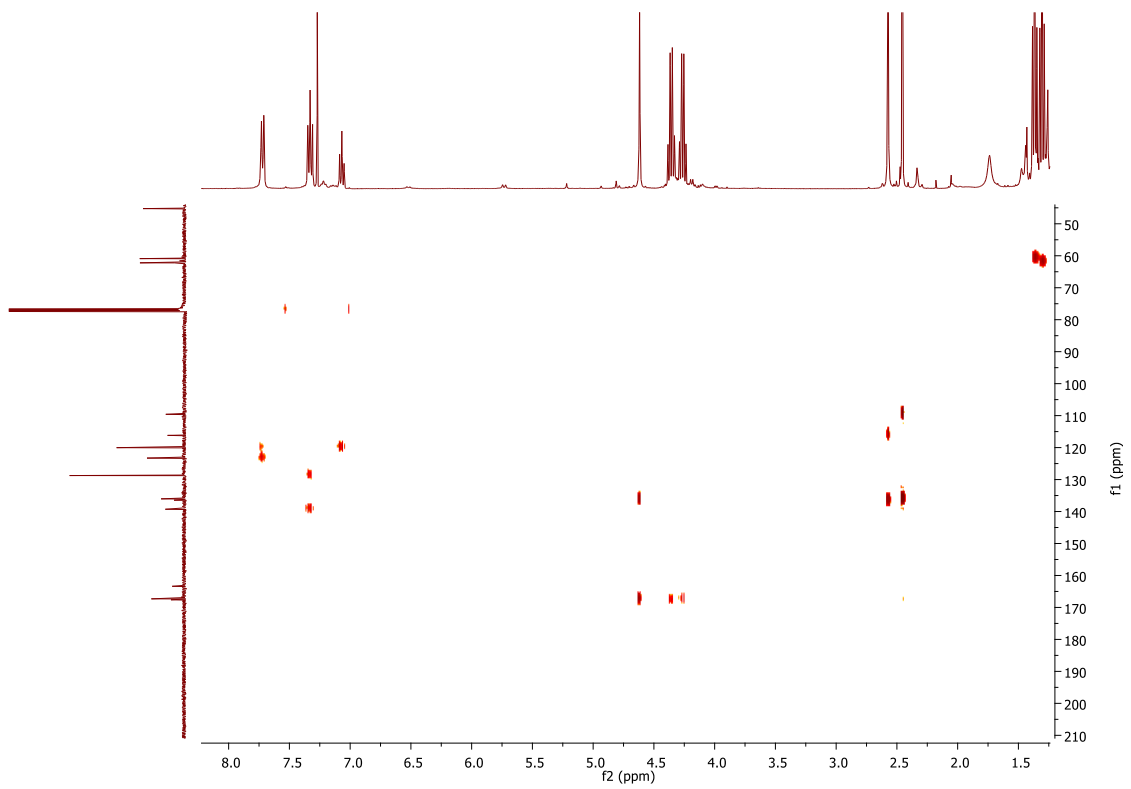

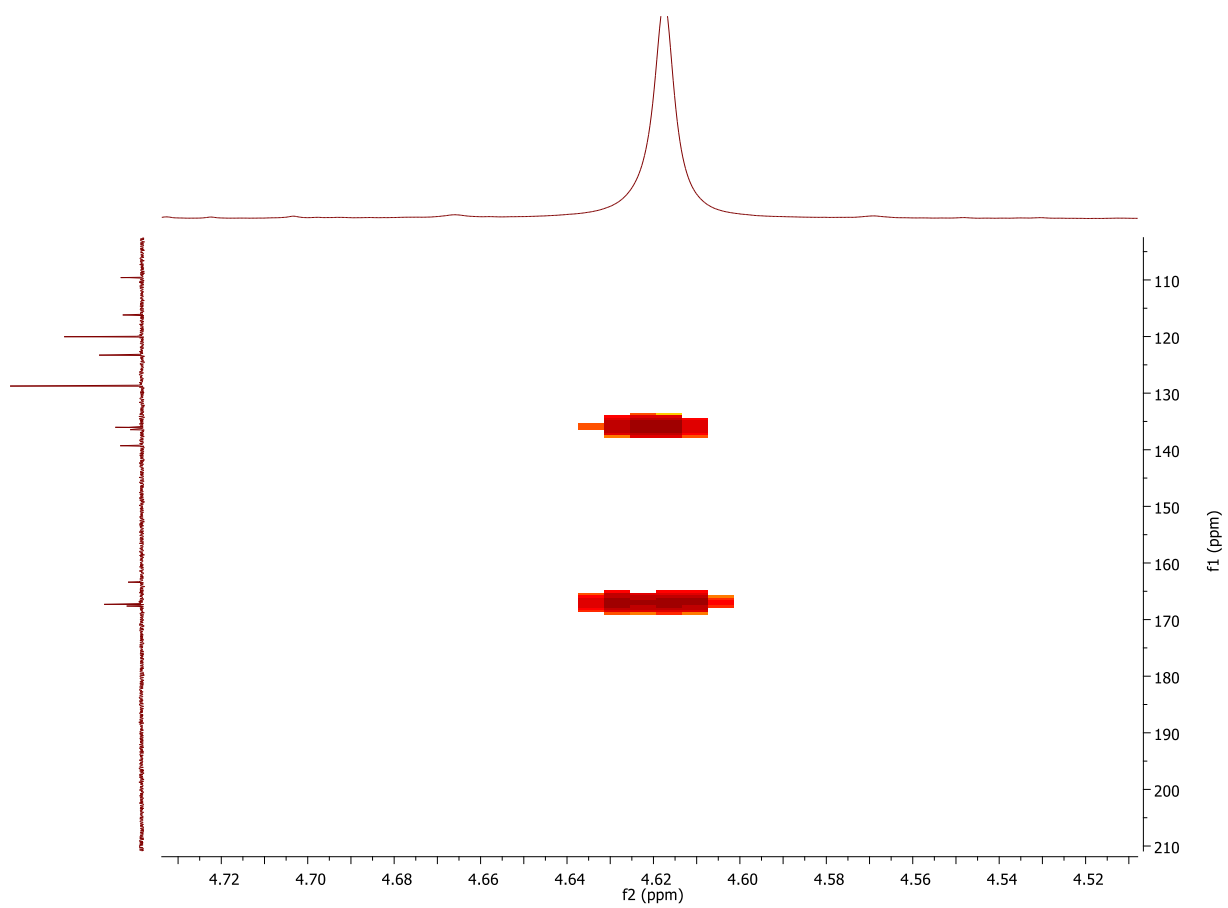

**5. General procedure for the synthesis of 1-amino-1*H*-pyrrole 6a and 1*H*-pyrroles 4a–l by basic treatment of 1-amino-1*H*-pyrroles 1a–m and DDs 2a,b.** To a magnetically stirred solution of 1-amino-1*H*-pyrroles **1a–m** (0.5 mmol) in MeCN (10 mL), the appropriate DD **2a,b** (1.0 mmol) and K<sub>2</sub>CO<sub>3</sub> (1.5 mmol) were added and then the reaction mixture was refluxed for 1 hour, until the TLC analysis revealed the disappearance of the starting reagent **1** and the formation of 1*H*-pyrroles **4a–l**. After the filtration of K<sub>2</sub>CO<sub>3</sub>, the solvent was removed in vacuo; the so-formed products **4** were purified by silica gel column chromatography using cyclohexane/ethyl acetate mixtures as eluent and then were crystallized from ethyl acetate/petroleum ether. Only in the case of the reaction between 1-amino-1*H*-pyrrole **1e** with the DD **2b**, after 0.5 hours, the TLC check detected the presence of a transient further spot, together with the one of the expected 1*H*-pyrrole **4d**, that was occasionally isolated and characterized as ethyl 1-((*tert*-butoxycarbonyl)(1-(dimethylamino)-1-oxo-3-(2-(phenylcarbamoyl)hydrazono)butan-2-yl)amino)-4-((4-methoxyphenyl)carbamoyl)-2,5-dimethyl-1*H*-pyrrole-3-carboxylate **6a**.

**6. Spectral data of 1-amino-1*H*-pyrrole 6a and 1*H*-pyrroles 4a–l.**

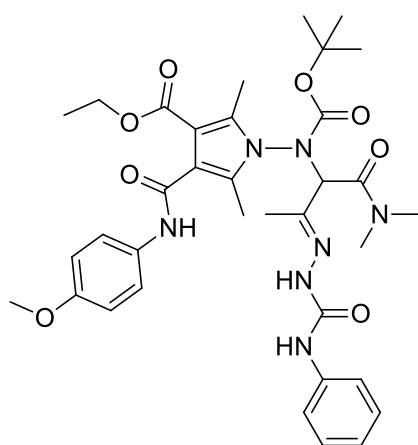

**Ethyl 1-((*tert*-butoxycarbonyl)(1-(dimethylamino)-1-oxo-3-(2-(phenylcarbamoyl)hydrazono)butan-2-yl)amino)-4-((4-methoxyphenyl)carbamoyl)-2,5-dimethyl-1*H*-pyrrole-3-carboxylate (**6a**).** The compound was obtained as white solid; mp: 107–109 °C; <sup>1</sup>H NMR (400 MHz, CDCl<sub>3</sub>, 25 °C): δ = 1.22 (t, *J*=6.8 Hz, 3H, OCH<sub>2</sub>CH<sub>3</sub>), 1.40 (brs, 9H, OC(CH<sub>3</sub>)<sub>3</sub>), 1.60 (s, 3H, CH<sub>3</sub>), 2.34 (s, 3H, CH<sub>3</sub>), 2.91 (s, 3H, CH<sub>3</sub>), 3.05 (s, 3H, N(CH<sub>3</sub>)<sub>2</sub>), 3.17 (s, 3H, N(CH<sub>3</sub>)<sub>2</sub>), 3.80 (s, 3H, OCH<sub>3</sub>), 4.24–4.29

(m, 2H, OCH<sub>2</sub>CH<sub>3</sub>), 5.67 (brs, 1H, CH), 6.86 (d, *J*=8.8 Hz, 2H<sub>ar</sub>), 7.11 (t, *J*=7.2 Hz, 1H<sub>ar</sub>), 7.34 (t, *J*=7.6 Hz, 2H<sub>ar</sub>), 7.45 (d, *J*=8.0 Hz, 2H<sub>ar</sub>), 7.62 (d, *J*=8.0 Hz, 2H<sub>ar</sub>), 7.97 (s, 1H, NH), 8.40 (brs, 1H, NH), 11.23 and 11.42 (2brs, 1H, NH).

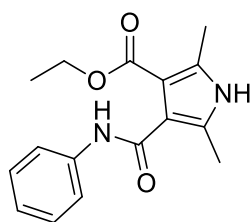

**Ethyl 2,5-dimethyl-4-(phenylcarbamoyl)-1*H*-pyrrole-3-carboxylate (**4a**).**

The compound was obtained as white solid (141.3 mg, 99%); mp: 203–204 °C; <sup>1</sup>H NMR (400 MHz, DMSO-*d*<sub>6</sub>, 25 °C): δ = 1.17 (t, *J*=7.2 Hz, 3H, OCH<sub>2</sub>CH<sub>3</sub>), 2.31 (s, 3H, CH<sub>3</sub>), 2.39 (s, 3H, CH<sub>3</sub>), 4.17 (q, *J*=7.2 Hz, 2H, OCH<sub>2</sub>CH<sub>3</sub>), 7.00 (t, *J*=7.2 Hz, 1H<sub>ar</sub>), 7.29 (t, *J*=7.2 Hz, 2H<sub>ar</sub>), 7.67 (d, *J*=7.2 Hz, 2H<sub>ar</sub>), 10.80 (s, 1H, NH), 11.47 (brs, 1H, NH); <sup>13</sup>C NMR (100 MHz, DMSO-*d*<sub>6</sub>, 25 °C): δ = 12.4 (q), 13.6 (q), 14.0 (q), 59.5 (t), 108.2 (s), 116.3 (s), 119.0 (d), 122.5 (d), 128.5 (d), 131.4 (s), 134.7 (s), 139.8 (s), 163.4 (s),

165.9 (s); IR (nujol):  $\nu_{\max} = 3226, 3124, 1673, 1653 \text{ cm}^{-1}$ ; MS  $m/z$  (ESI): 287.21 ( $M + H^+$ ); anal. calcd. for  $C_{16}H_{18}N_2O_3$  (286.33): C 67.12, H 6.34, N 9.78; found: C 67.25, H 6.42, N 9.65.

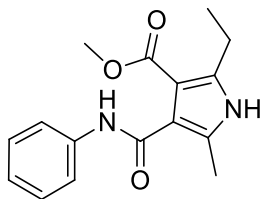

**Methyl 2-ethyl-5-methyl-4-(phenylcarbamoyl)-1H-pyrrole-3-carboxylate (4b).** The compound was obtained as white solid (83.2 mg, 58%); mp: 200–202 °C;  $^1\text{H}$  NMR (400 MHz,  $\text{DMSO}_{d6}$ , 25 °C):  $\delta = 1.16$  (t,  $J=7.2$  Hz, 3H,  $\text{CH}_2\text{CH}_3$ ), 2.30 (s, 3H,  $\text{CH}_3$ ), 2.81 (q,  $J=7.2$  Hz, 2H,  $\text{CH}_2\text{CH}_3$ ), 3.68 (s, 3H,  $\text{OCH}_3$ ), 7.01 (t,  $J=7.2$  Hz, 1H<sub>ar</sub>), 7.29 (t,  $J=7.6$  Hz, 2H<sub>ar</sub>), 7.66 (d,  $J=8.0$  Hz, 2H<sub>ar</sub>), 10.52 (s, 1H,  $\text{NH}$ ), 11.39 (brs, 1H,  $\text{NH}$ );  $^{13}\text{C}$  NMR (100 MHz,  $\text{CDCl}_3$ , 25 °C):  $\delta = 12.2$  (q), 14.2 (q), 20.3 (t), 51.0 (q), 107.4 (s), 116.6 (s), 119.1 (d), 122.6 (d), 128.5 (d), 130.8 (s), 139.8 (s), 140.2 (s), 163.6 (s), 165.9 (s); IR (nujol):  $\nu_{\max} = 3264, 3198, 1654, 1627 \text{ cm}^{-1}$ ; MS  $m/z$  (ESI): 287.01 ( $M + H^+$ ); anal. calcd. for  $C_{16}H_{18}N_2O_3$  (286.33): C 67.12, H 6.34, N 9.78; found: C 66.98, H 6.28, N 9.83.

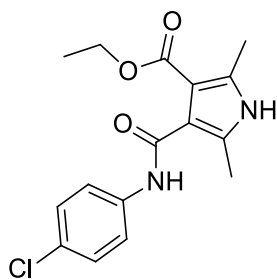

**Ethyl 4-((4-chlorophenyl)carbamoyl)-2,5-dimethyl-1H-pyrrole-3-carboxylate (4c).** The compound was obtained as white solid (158.7 mg, 99% from **2c** and **1a**, 101.2 mg, 63% from **2d** and **1a**); mp: 212–214 °C;  $^1\text{H}$  NMR (400 MHz,  $\text{DMSO}_{d6}$ , 25 °C):  $\delta = 1.14$  (t,  $J=7.2$  Hz, 3H,  $\text{OCH}_2\text{CH}_3$ ), 2.30 (s, 3H,  $\text{CH}_3$ ), 2.39 (s, 3H,  $\text{CH}_3$ ), 4.14 (q,  $J=7.2$  Hz, 2H,  $\text{OCH}_2\text{CH}_3$ ), 7.34 (d,  $J=8.8$  Hz, 2H<sub>ar</sub>), 7.71 (d,  $J=8.8$  Hz, 2H<sub>ar</sub>), 10.88 (s, 1H,  $\text{NH}$ ), 11.51 (brs, 1H,  $\text{NH}$ );  $^{13}\text{C}$  NMR (100 MHz,  $\text{CDCl}_3$ , 25 °C):  $\delta = 12.4$  (q), 13.5 (q), 14.1 (q), 59.5 (t), 108.2 (s), 116.2 (s), 120.4 (d), 126.0 (s), 128.5 (d), 131.4 (s), 134.8 (s), 138.8 (s), 163.7(s), 165.8 (s); IR (nujol):  $\nu_{\max} = 3216, 3124, 1652, 1592 \text{ cm}^{-1}$ ; MS  $m/z$  (ESI): 321.26 ( $M + H^+$ ); anal. calcd. for  $C_{16}H_{17}ClN_2O_3$  (320.77): C 59.91, H 5.34, N 8.73; found: C 60.06, H 5.28, N 8.80.

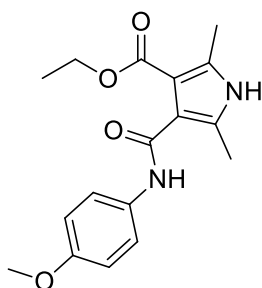

**Ethyl 4-((4-methoxyphenyl)carbamoyl)-2,5-dimethyl-1H-pyrrole-3-carboxylate (4d).** The compound was obtained as white solid (129.4 mg, 82%); mp: 198–200 °C;  $^1\text{H}$  NMR (400 MHz,  $\text{CDCl}_3$ , 25 °C):  $\delta = 1.38$  (t,  $J=7.2$  Hz, 3H,  $\text{OCH}_2\text{CH}_3$ ), 2.40 (s, 3H,  $\text{CH}_3$ ), 2.50 (s, 3H,  $\text{CH}_3$ ), 3.79 (s, 3H,  $\text{OCH}_3$ ), 4.35 (q,  $J=7.2$  Hz, 2H,  $\text{OCH}_2\text{CH}_3$ ), 6.86 (d,  $J=8.8$  Hz, 2H<sub>ar</sub>), 7.62 (d,  $J=8.8$  Hz, 2H<sub>ar</sub>), 9.36 (brs, 1H,  $\text{NH}$ ), 11.84 (s, 1H,  $\text{NH}$ );  $^{13}\text{C}$  NMR (100 MHz,  $\text{CDCl}_3$ , 25 °C):  $\delta = 14.3$  (q), 14.3 (q), 15.1 (q), 55.5 (q), 60.7 (t), 108.5 (s), 114.0 (d), 115.2 (s), 121.9 (d), 132.5 (s), 135.8 (s), 135.9 (s), 155.8 (s), 163.6 (s), 168.1 (s); IR (nujol):  $\nu_{\max} = 3232, 3142, 1653, 1634 \text{ cm}^{-1}$ ; MS  $m/z$  (ESI): 317.81 ( $M + H^+$ ); anal. calcd. for  $C_{17}H_{20}N_2O_4$  (316.35): C 64.54, H 6.37, N 8.86; found: C 64.67, H 6.31, N 8.76.

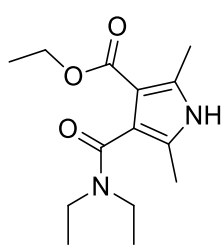

**Ethyl 4-(diethylcarbamoyl)-2,5-dimethyl-1H-pyrrole-3-carboxylate (4e).** The compound was obtained as white solid (98.6 mg, 74%); mp: 202–204 °C; <sup>1</sup>H NMR (400 MHz, DMSO-*d*<sub>6</sub>, 25 °C): δ = 0.91 (t, *J*=7.2 Hz, 3H, N(CH<sub>2</sub>CH<sub>3</sub>)<sub>2</sub>), 1.10 (t, *J*=7.2 Hz, 3H, N(CH<sub>2</sub>CH<sub>3</sub>)<sub>2</sub>), 1.16 (t, *J*=7.2 Hz, 3H, OCH<sub>2</sub>CH<sub>3</sub>), 1.98 (s, 3H, CH<sub>3</sub>), 2.35 (s, 3H, CH<sub>3</sub>), 3.03–3.22 (m, 2H, N(CH<sub>2</sub>CH<sub>3</sub>)<sub>2</sub>), 3.29–3.42 (m, 2H, N(CH<sub>2</sub>CH<sub>3</sub>)<sub>2</sub>), 4.02–4.08 (m, 2H, OCH<sub>2</sub>CH<sub>3</sub>), 11.15 (brs, 1H, NH); <sup>13</sup>C NMR (100 MHz, CDCl<sub>3</sub>, 25 °C): δ = 10.6 (q), 12.6 (q), 12.8 (q), 13.9 (q), 14.3 (q), 38.2 (t), 42.3 (t), 58.4 (t), 108.0 (s), 117.4 (s), 122.7 (s), 133.7 (s), 164.0 (s), 166.7 (s); IR (nujol): ν<sub>max</sub> = 3232, 1653, 1634 cm<sup>-1</sup>; MS *m/z* (ESI): 267.33 (M + H<sup>+</sup>); anal. calcd. for C<sub>14</sub>H<sub>22</sub>N<sub>2</sub>O<sub>3</sub> (266.16): C 63.13, H 8.33, N 10.52; found: C 63.01, H 8.38, N 10.64.

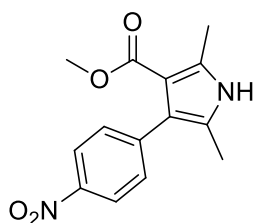

**Methyl 2,5-dimethyl-4-(4-nitrophenyl)-1H-pyrrole-3-carboxylate (4f).**

The compound was obtained as yellow solid (89.3 mg, 65%); mp: 170–172 °C; <sup>1</sup>H NMR (400 MHz, CDCl<sub>3</sub>, 25 °C): δ = 2.13 (s, 3H, CH<sub>3</sub>), 2.51 (s, 3H, CH<sub>3</sub>), 3.65 (s, 3H, OCH<sub>3</sub>), 7.40 (d, *J*=8.8 Hz, 2H<sub>ar</sub>), 8.19 (d, *J*=8.8 Hz, 2H<sub>ar</sub>), 8.41 (brs, 1H, NH); <sup>13</sup>C NMR (100 MHz, CDCl<sub>3</sub>, 25 °C): δ = 11.2 (q), 13.6 (q), 50.5 (t), 110.4 (s), 120.7 (s), 122.7 (d), 124.6 (s), 130.9 (d), 134.9 (s), 143.6 (s), 145.9 (s), 165.3 (s); IR (nujol): ν<sub>max</sub> = 3232, 1725, 1634 cm<sup>-1</sup>; MS *m/z* (ESI): 275.81 (M + H<sup>+</sup>); anal. calcd. for C<sub>14</sub>H<sub>14</sub>N<sub>2</sub>O<sub>4</sub> (274.10): C 61.31, H 5.14, N 10.21; found: C 61.22, H 5.11, N 10.28.

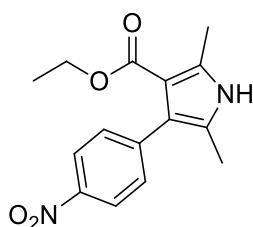

**Ethyl 2,5-dimethyl-4-(4-nitrophenyl)-1H-pyrrole-3-carboxylate (4g).**<sup>3</sup>

The compound was obtained as yellow solid (82.3 mg, 57%); mp: 164–165 °C; <sup>1</sup>H NMR (400 MHz, DMSO-*d*<sub>6</sub>, 25 °C): δ = 1.04 (t, *J*=7.2 Hz, 3H, OCH<sub>2</sub>CH<sub>3</sub>), 2.09 (s, 3H, CH<sub>3</sub>), 2.41 (s, 3H, CH<sub>3</sub>), 4.00 (q, *J*=7.2 Hz, 2H, OCH<sub>2</sub>CH<sub>3</sub>), 7.43 (d, *J*=8.8 Hz, 2H<sub>ar</sub>), 7.43 (d, *J*=8.8 Hz, 2H<sub>ar</sub>), 11.36 (brs, 1H, NH); <sup>13</sup>C NMR (100 MHz, CDCl<sub>3</sub>, 25 °C): δ = 11.0 (q), 13.1 (q), 14.0 (q), 58.5 (t), 109.0 (s), 119.3 (s), 122.3 (d), 125.0 (s), 131.0 (d), 134.6 (s), 143.9 (s), 145.0 (s), 164.4 (s); IR (nujol): ν<sub>max</sub> = 3276, 1722, 1668 cm<sup>-1</sup>; MS *m/z* (ESI): 289.81 (M + H<sup>+</sup>); anal. calcd. for C<sub>15</sub>H<sub>16</sub>N<sub>2</sub>O<sub>4</sub> (288.30): C 62.49, H 5.59, N 9.72; found: C 62.62, H 5.61, N 9.62.

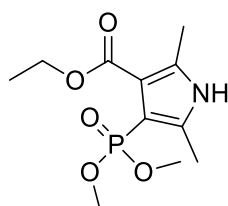

**Ethyl 4-(dimethoxyphosphoryl)-2,5-dimethyl-1H-pyrrole-3-carboxylate (4h).**

The compound was obtained as yellow solid (90.9 mg, 66%); mp: 178–180 °C; <sup>1</sup>H NMR (400 MHz, DMSO-*d*<sub>6</sub>, 25 °C): δ = 1.23 (t, *J*=7.2 Hz, 3H, OCH<sub>2</sub>CH<sub>3</sub>), 2.32 (s, 3H, CH<sub>3</sub>), 2.33 (d, *J*<sub>HP</sub>=1.6 Hz, 3H, CH<sub>3</sub>), 3.52 (s, 3H, OCH<sub>3</sub>), 3.55 (s, 3H, OCH<sub>3</sub>), 4.11 (q, *J*=7.2 Hz, 2H, OCH<sub>2</sub>CH<sub>3</sub>), 11.55 (brs, 1H, NH); <sup>13</sup>C NMR (100 MHz, DMSO-*d*<sub>6</sub>, 25 °C): δ = 12.5 (q), 12.7 (q), 14.1 (q), 51.4 (q), 51.5 (q), 58.9 (t), 102.0 (s, *J*<sub>1CP</sub>=213.7 Hz), 112.8 (s, *J*<sub>2CP</sub>=11.4 Hz), 135.0 (s, *J*<sub>3CP</sub>=13.1 Hz), 137.3 (s, *J*<sub>2CP</sub>=22.4 Hz), 163.9 (s); IR (nujol): ν<sub>max</sub> = 3232,

1652, 1634  $\text{cm}^{-1}$ ; MS  $m/z$  (ESI): 276.38 ( $M + H^+$ ); anal. calcd. for  $C_{11}H_{18}NO_5P$  (275.09): C 48.00, H 6.59, N 5.09; found: C 48.09, H 6.56, N 5.06.

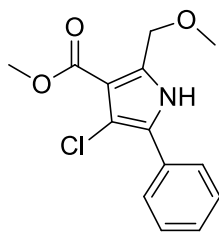

**Methyl 4-chloro-2-(methoxymethyl)-5-phenyl-1H-pyrrole-3-carboxylate (4i).**

The compound was obtained as white solid (99.1 mg, 71%); mp: 209–211 °C;  $^1\text{H}$  NMR (400 MHz,  $\text{CDCl}_3$ , 25 °C):  $\delta$  = 3.51 (s, 3H,  $\text{OCH}_3$ ), 3.87 (s, 3H,  $\text{OCH}_3$ ), 4.80 (s, 2H,  $\text{CH}_2\text{OCH}_3$ ), 7.33 (t,  $J=7.2$  Hz, 1H<sub>ar</sub>), 7.44 (t,  $J=8.0$  Hz, 2H<sub>ar</sub>), 7.64 (d,  $J=8.0$  Hz, 2H<sub>ar</sub>), 9.00 (brs, 1H,  $\text{NH}$ );  $^{13}\text{C}$  NMR (100 MHz,  $\text{CDCl}_3$ , 25 °C):  $\delta$  = 51.1 (q), 59.1 (q), 67.8 (t), 109.5 (s), 110.0 (s), 126.7 (d), 127.1 (s), 127.7 (d), 128.8 (d), 130.4 (s), 136.0 (s), 164.2 (s); IR (nujol):  $\nu_{\text{max}}$  = 3226, 1729, 1713, 1683  $\text{cm}^{-1}$ ; MS  $m/z$  (ESI): 280.81 ( $M + H^+$ ); anal. calcd. for  $C_{14}H_{14}ClNO_3$  (279.72): C 60.11, H 5.04, N 5.01; found: C 60.19, H 4.99, N 5.04.

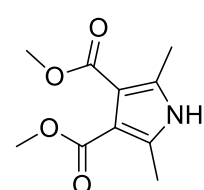

**Dimethyl 2,5-dimethyl-1H-pyrrole-3,4-dicarboxylate (4j).**<sup>4</sup>

The compound was obtained as pale yellow solid (54.9 mg, 52%); mp: 112–113 °C;  $^1\text{H}$  NMR (400 MHz,  $\text{CDCl}_3$ , 25 °C):  $\delta$  = 2.31 (s, 6H,  $2\text{CH}_3$ ), 3.78 (s, 6H,  $2\text{OCH}_3$ ), 8.97 (brs, 1H,  $\text{NH}$ );  $^{13}\text{C}$  NMR (100 MHz,  $\text{CDCl}_3$ , 25 °C):  $\delta$  = 12.3 (q), 51.3 (q), 112.0 (s), 132.8

(s), 166.0 (s); IR (nujol):  $\nu_{\text{max}}$  = 3262, 1736, 1715, 1675  $\text{cm}^{-1}$ ; MS  $m/z$  (ESI): 212.22 ( $M + H^+$ ); anal. calcd. for  $C_{10}H_{13}NO_4$  (211.08): C 56.86, H 6.20, N 6.63; found: C 56.98, H 6.16, N 6.66.

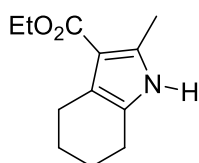

**Ethyl 2-methyl-4,5,6,7-tetrahydro-1H-indole-3-carboxylate (4k).**

The compound was obtained as pale yellow solid (68.4 mg, 66%); mp: 121–122 °C;  $^1\text{H}$  NMR (400 MHz,  $\text{CDCl}_3$ , 25 °C):  $\delta$  = 1.34 (t,  $J=7.2$  Hz, 3H,  $\text{OCH}_2\text{CH}_3$ ), 1.71–1.81

(m, 4H,  $\text{CH}_2\text{CH}_2\text{CH}_2\text{CH}_2$ ), 2.48–2.51 (m, 5H,  $\text{CH}_2\text{CH}_2\text{CH}_2\text{CH}_2$  and  $\text{CH}_3$ ), 2.70 (t,  $J=5.6$  Hz, 2H,  $\text{CH}_2\text{CH}_2\text{CH}_2\text{CH}_2$ ), 4.25 (q,  $J=7.2$  Hz, 2H,  $\text{OCH}_2\text{CH}_3$ ), 7.83 (brs, 1H,  $\text{NH}$ );  $^{13}\text{C}$  NMR (100 MHz,  $\text{CDCl}_3$ , 25 °C):  $\delta$  = 13.6 (q), 14.5 (q), 22.4 (t), 22.9 (t), 23.3 (t), 23.5 (t), 58.9 (t), 109.6 (s), 118.7 (s), 125.3 (s), 134.0 (s), 166.3 (s); IR (nujol):  $\nu_{\text{max}}$  = 3258, 1736, 1675  $\text{cm}^{-1}$ ; MS  $m/z$  (ESI): 208.38 ( $M + H^+$ ); anal. calcd. for  $C_{12}H_{17}NO_2$  (207.27): C 69.54, H 8.27, N 6.76; found: C 69.36, H 8.34, N 6.82.

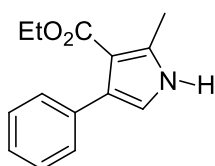

**Ethyl 2-methyl-4-phenyl-1H-indole-3-carboxylate (4l).**

The compound was obtained as pale yellow solid (61.1 mg, 53%); mp: 118–120 °C;  $^1\text{H}$  NMR (400 MHz,  $\text{CDCl}_3$ , 25 °C):  $\delta$  = 1.37 (t,  $J=7.2$  Hz, 3H,  $\text{OCH}_2\text{CH}_3$ ), 2.59 (s, 3H,  $\text{CH}_3$ ), 4.31 (q,  $J=7.2$  Hz, 2H,  $\text{OCH}_2\text{CH}_3$ ), 6.85 (d,  $J=2.8$  Hz, 1H,  $\text{CH}$ ), 7.22 (t,  $J=7.2$  Hz,

1H, Ar), 7.36 (t,  $J=8.0$  Hz, 2H, Ar), 7.47 (d,  $J=7.2$  Hz, 2H, Ar), 8.81 (brs, 1H,  $\text{NH}$ );  $^{13}\text{C}$  NMR (100 MHz,  $\text{CDCl}_3$ , 25 °C):  $\delta$  = 13.4 (q), 14.5 (q), 59.6 (t), 107.3 (d), 113.3 (d), 123.6 (d), 126.5 (d), 128.9 (d), 130.0 (s), 131.8 (s), 136.2 (s), 165.7 (s); IR (nujol):  $\nu_{\text{max}}$  = 3266, 1738, 1677  $\text{cm}^{-1}$ ; MS  $m/z$  (ESI): 230.31 ( $M + H^+$ ); anal. calcd. for  $C_{14}H_{15}NO_2$  (229.27): C 73.34, H 6.59, N 6.11; found: C 73.46, H 6.56, N 6.14.

7.  $^1\text{H}$  and  $^{13}\text{C}$  spectra of 1-amino-1*H*-pyrrole 6a and 1*H*-pyrroles 4a–l.

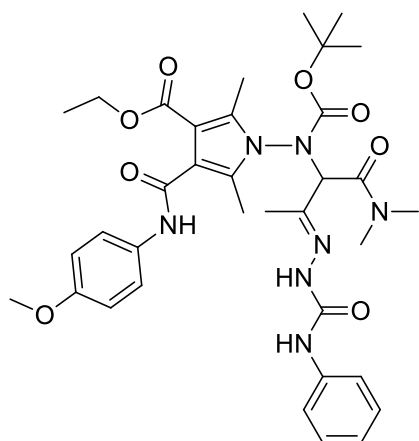

**Ethyl 1-((*tert*-butoxycarbonyl)(1-(dimethylamino)-1-oxo-3-(2-(4-methoxyphenyl)carbamoyl)hydrazono)butan-2-yl)amino)-4-((4-methoxyphenyl)carbamoyl)-2,5-dimethyl-1*H*-pyrrole-3-carboxylate (6a).**

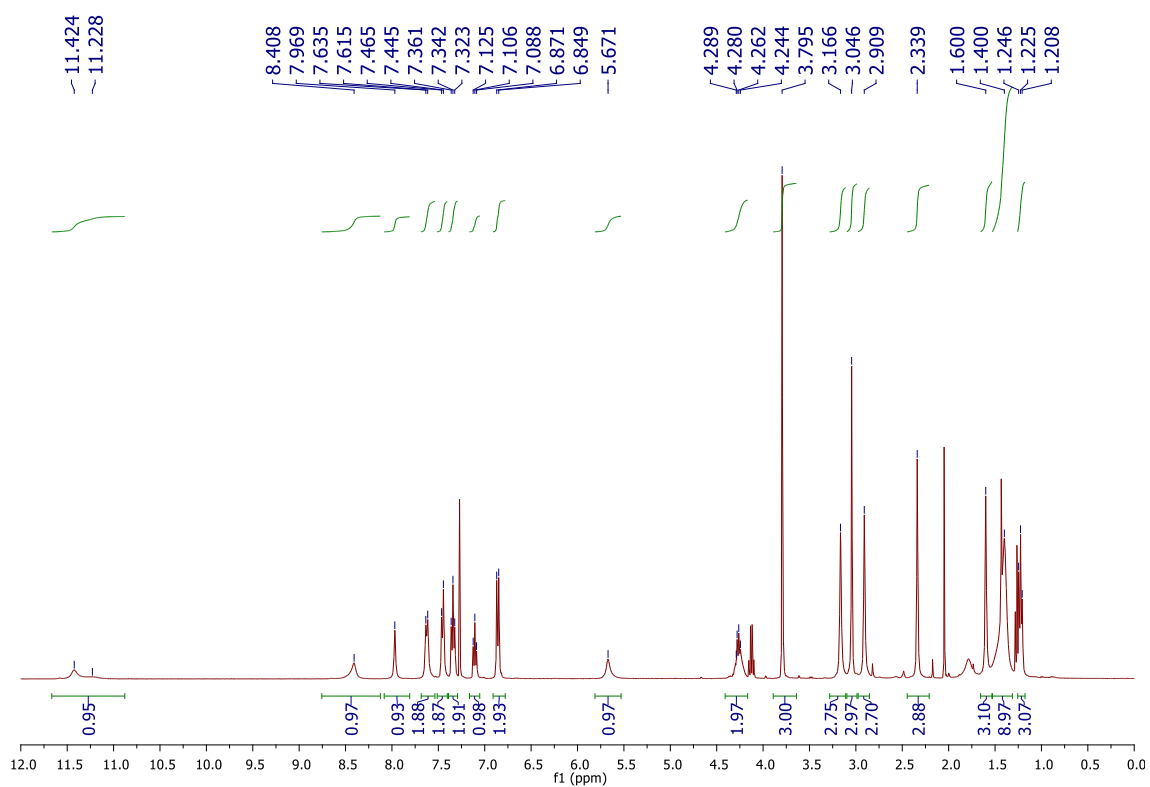

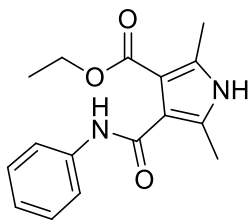

**Ethyl 2,5-dimethyl-4-(phenylcarbamoyl)-1H-pyrrole-3-carboxylate (4a).**

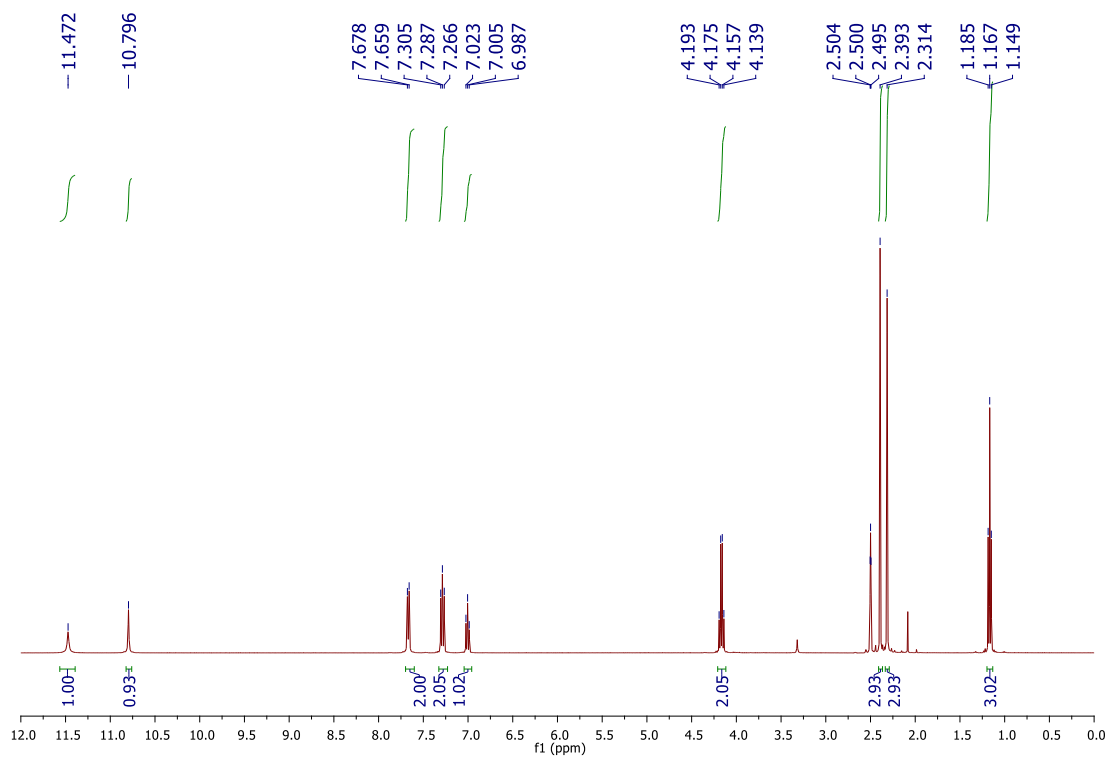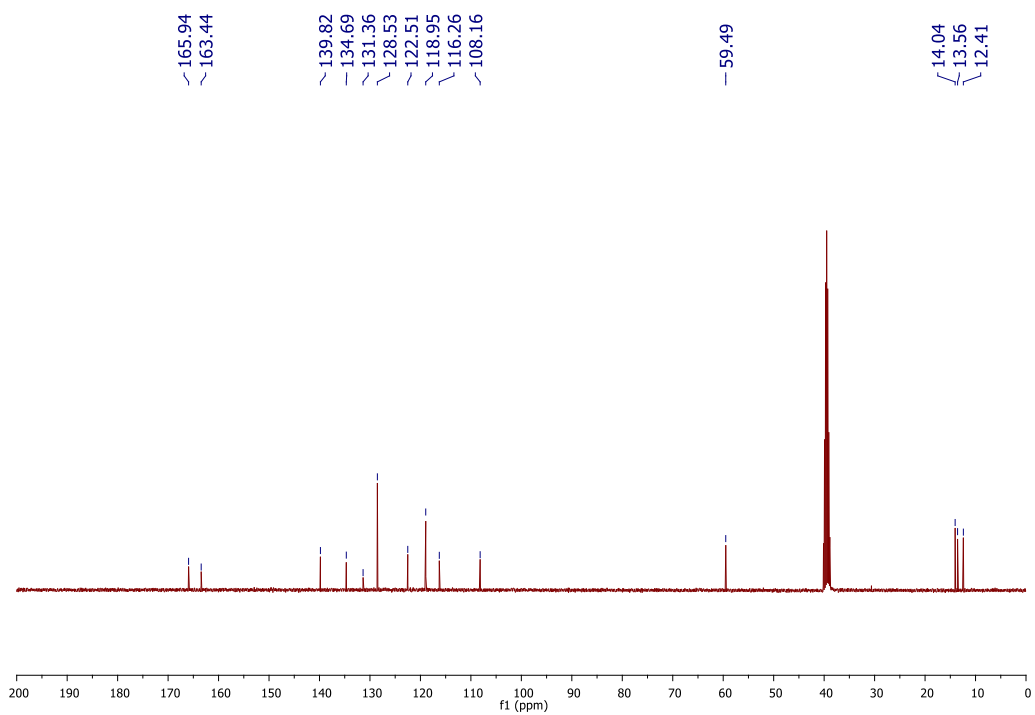



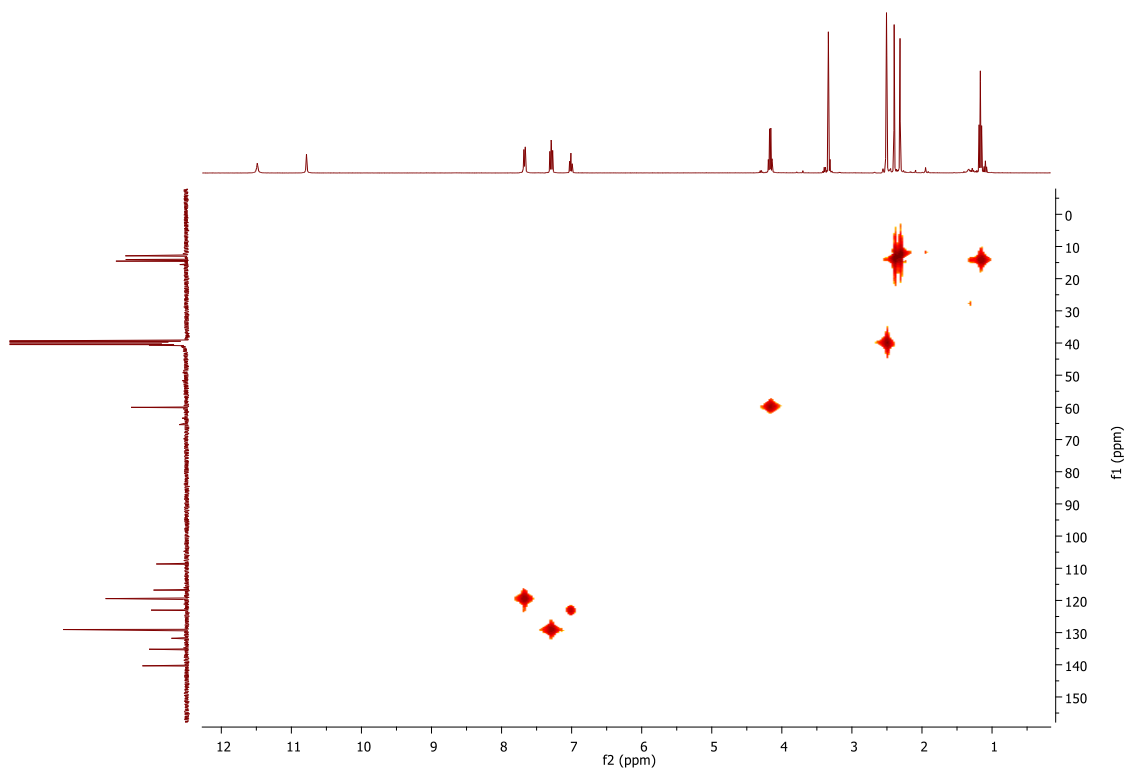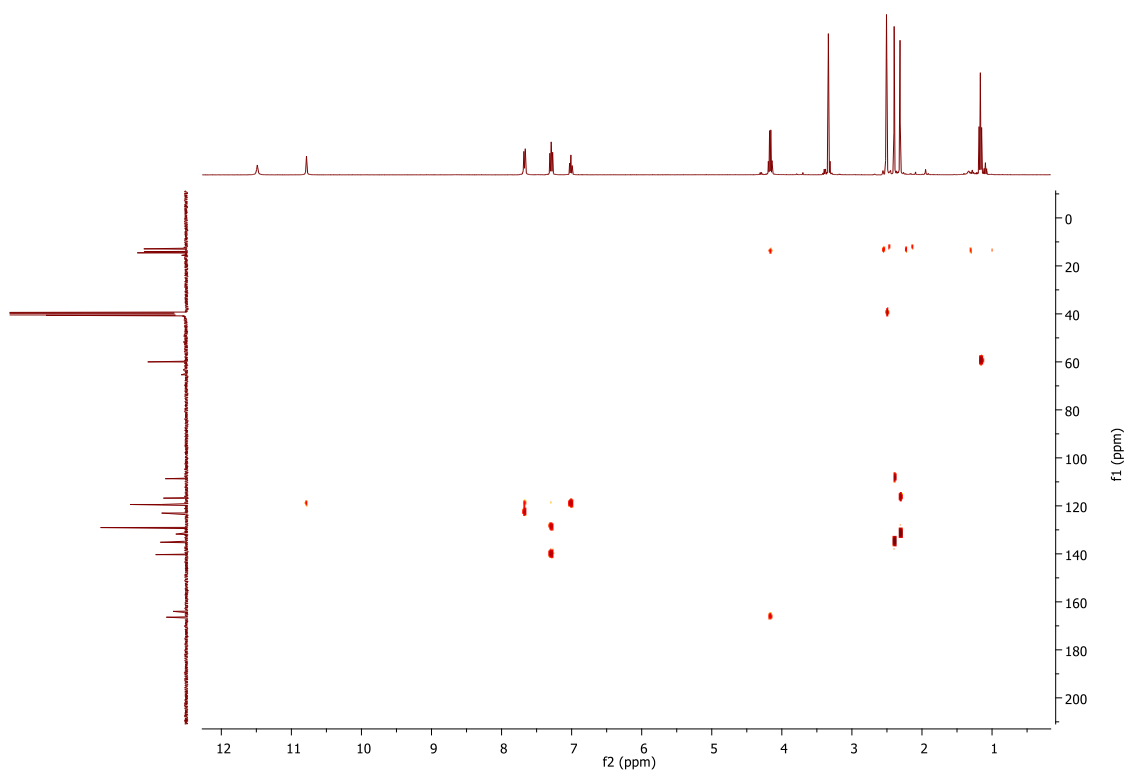

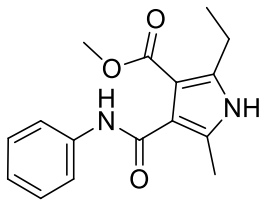

**Methyl 2-ethyl-5-methyl-4-(phenylcarbamoyl)-1H-pyrrole-3-carboxylate (4b).**

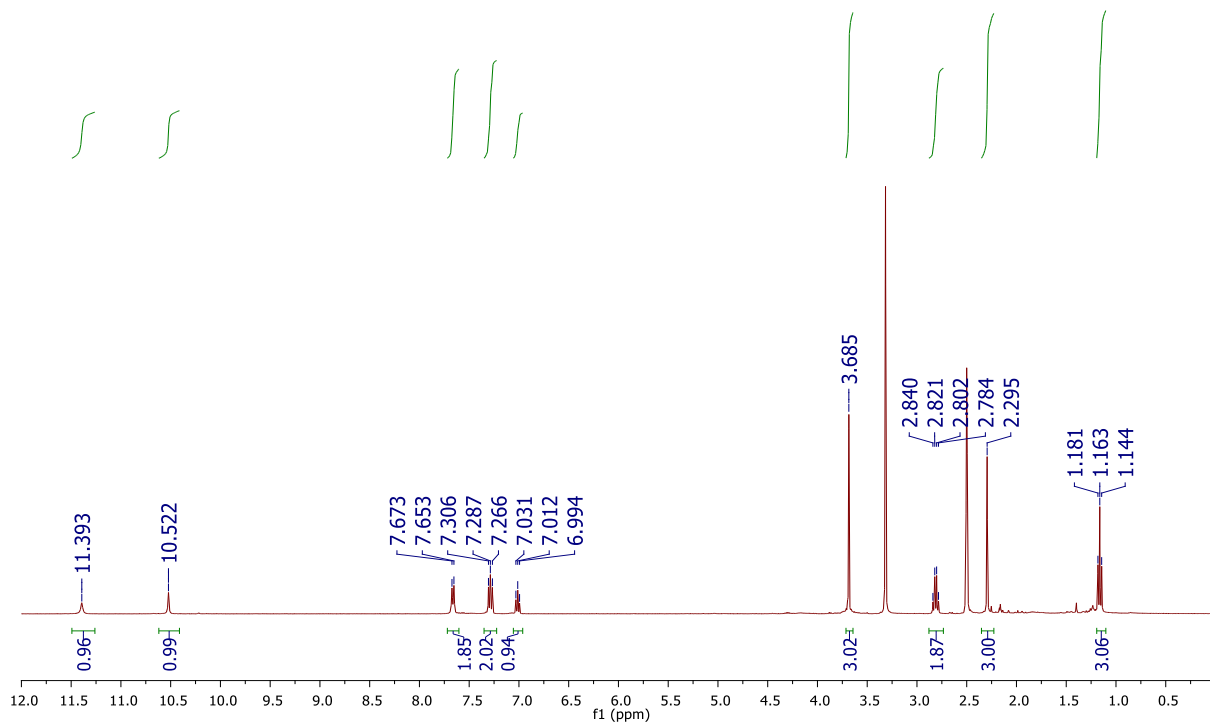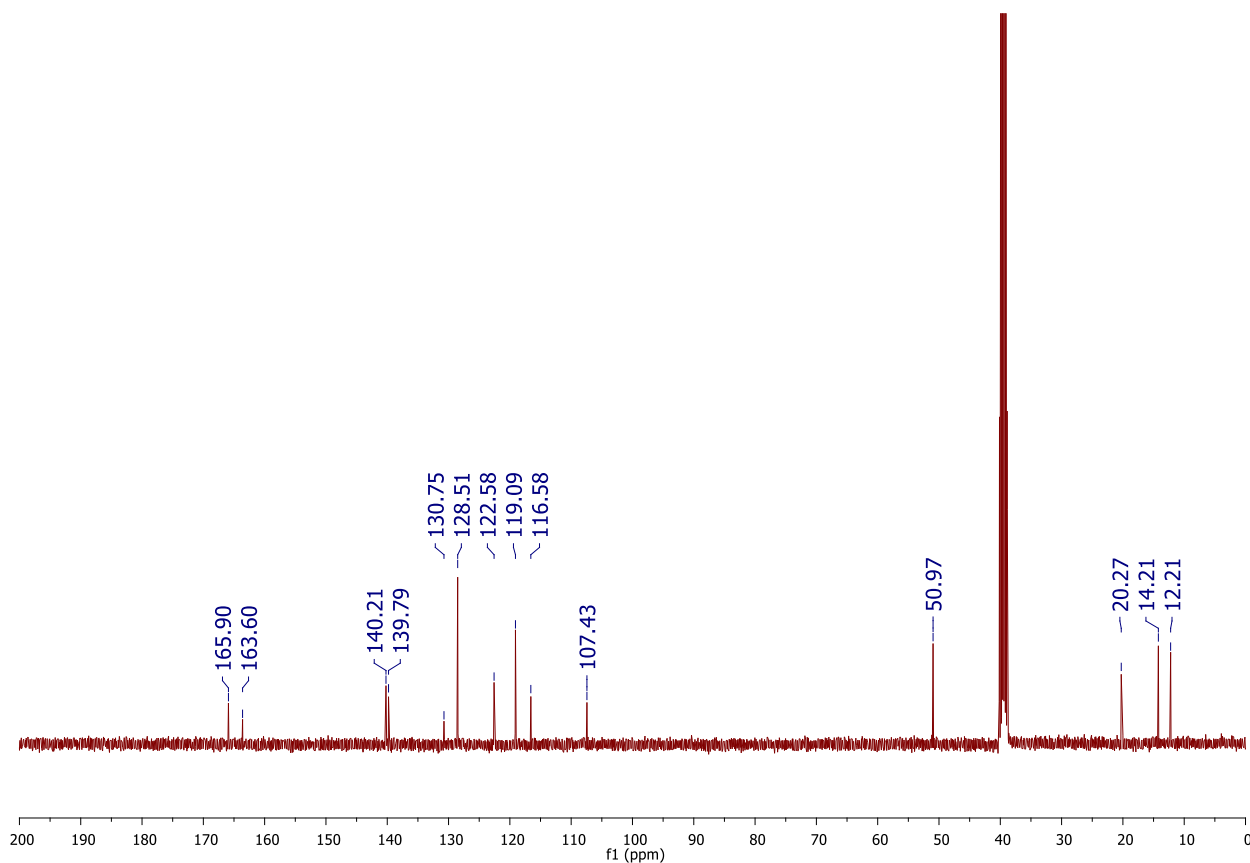

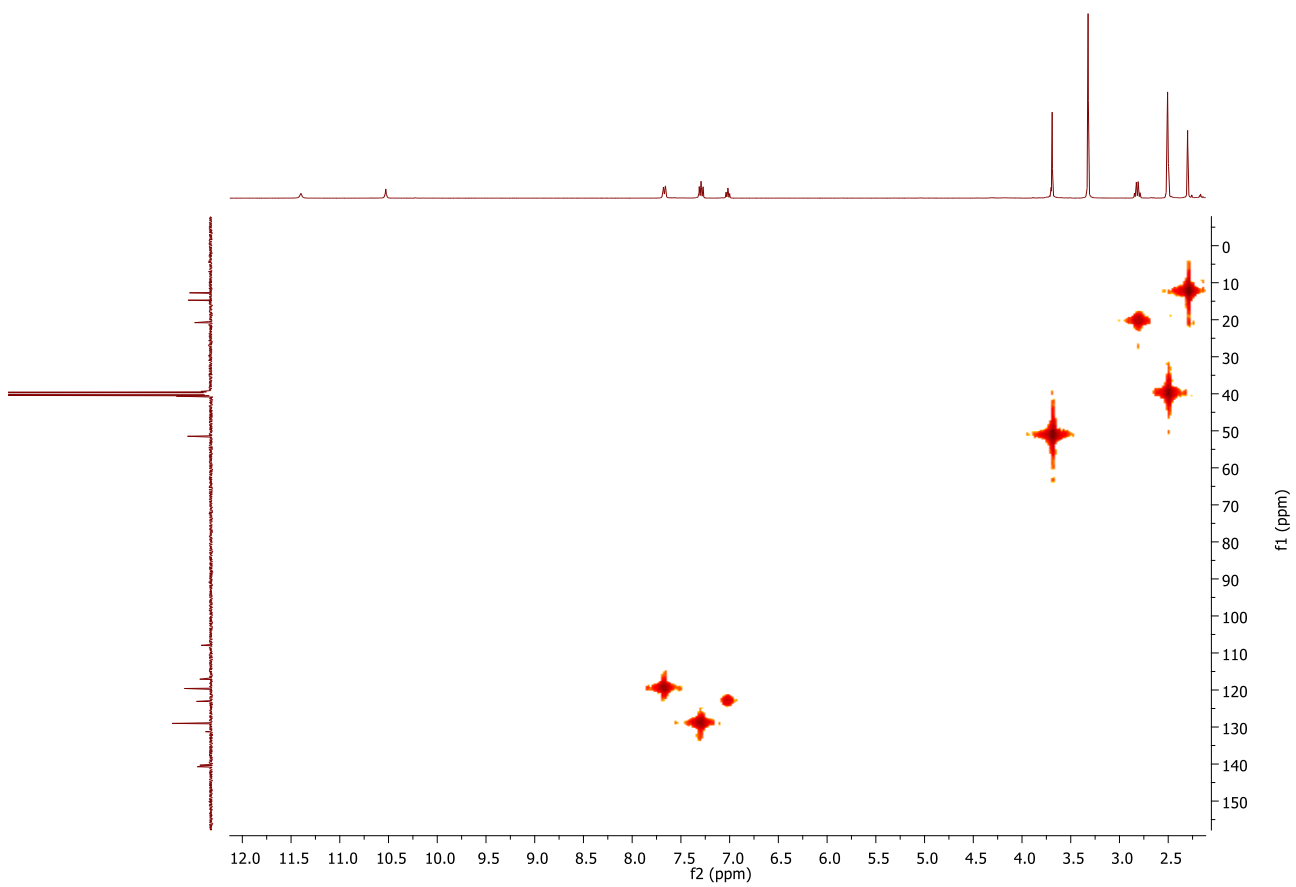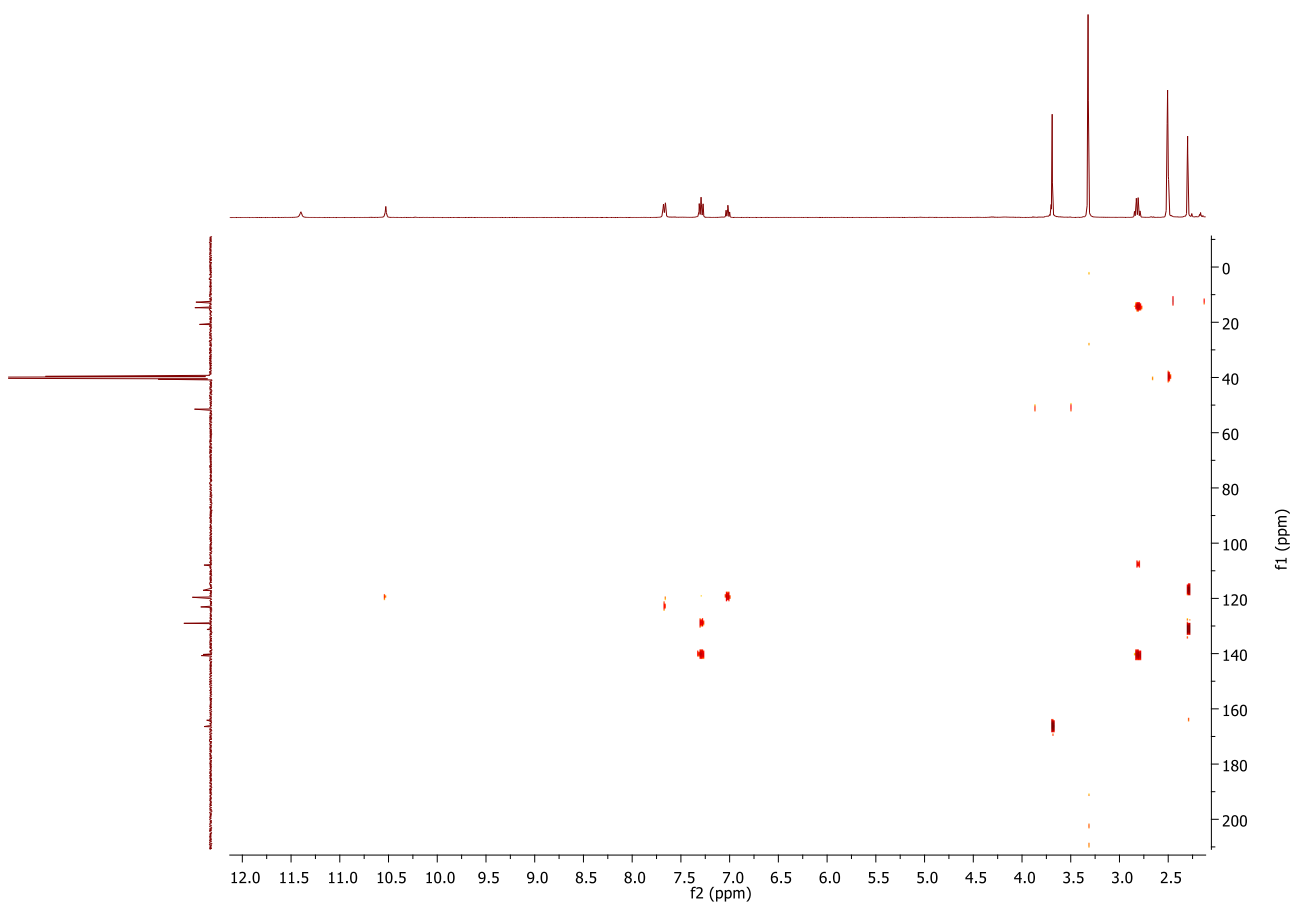

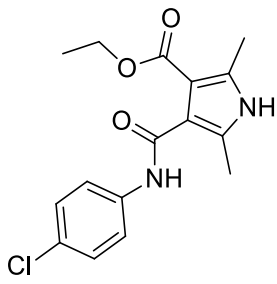

**Ethyl 4-((4-chlorophenyl)carbamoyl)-2,5-dimethyl-1H-pyrrole-3-carboxylate (4c).**

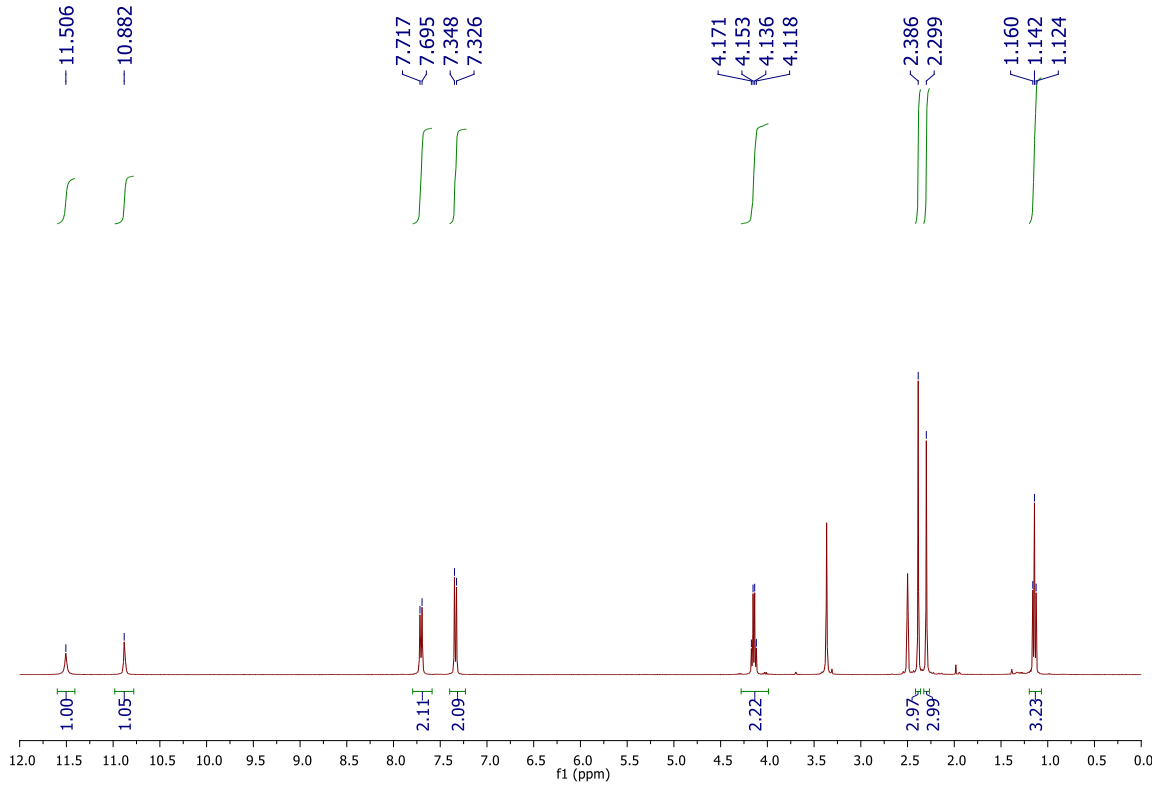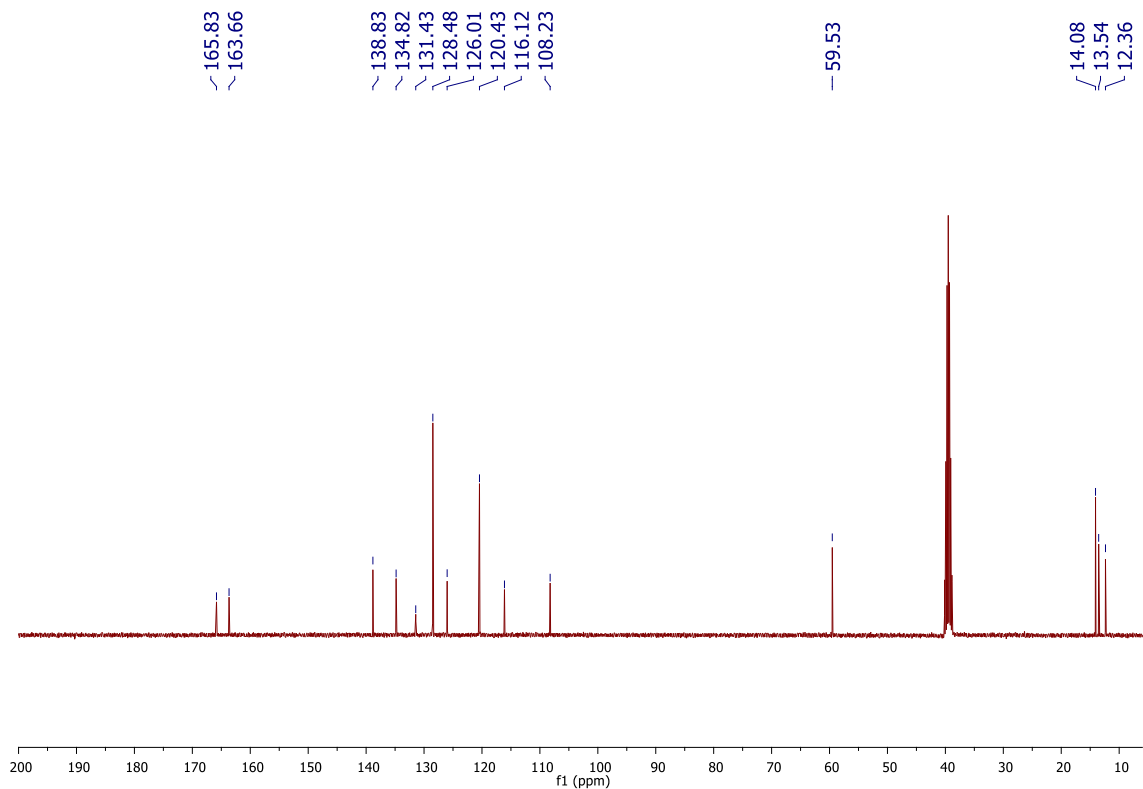

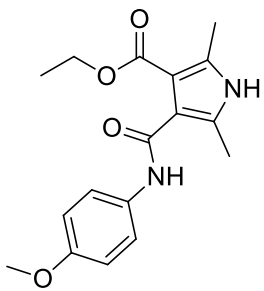

**Ethyl 4-((4-methoxyphenyl)carbamoyl)-2,5-dimethyl-1H-pyrrole-3-carboxylate (4d).**

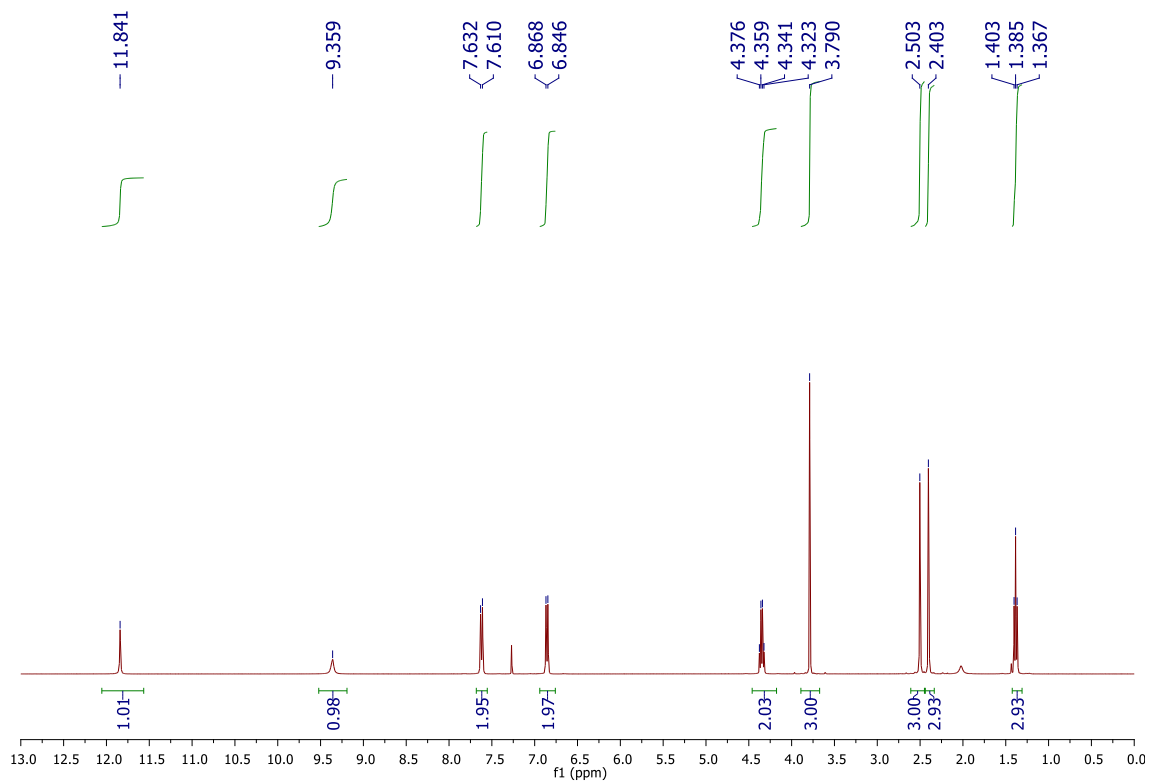

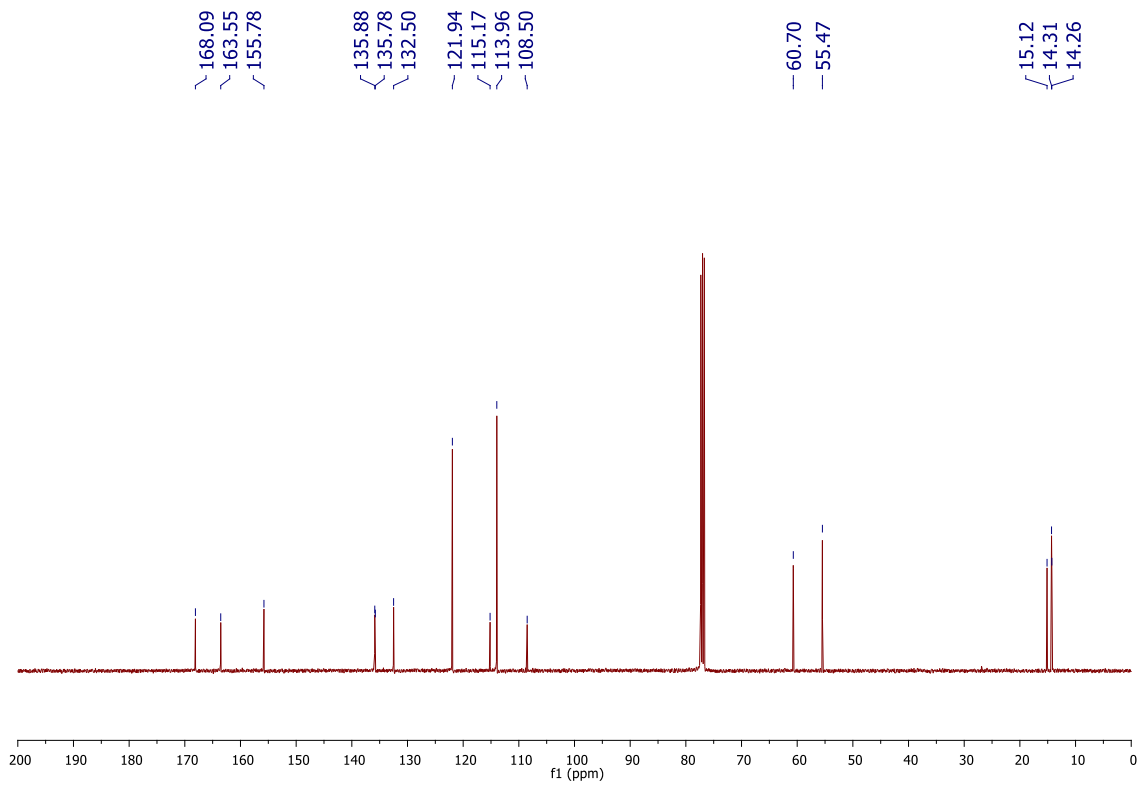

# Ethyl 4-(diethylcarbamoyl)-2,5-dimethyl-1H-pyrrole-3-carboxylate (4e).

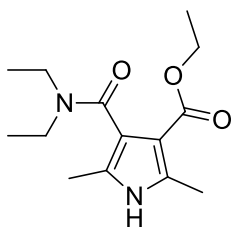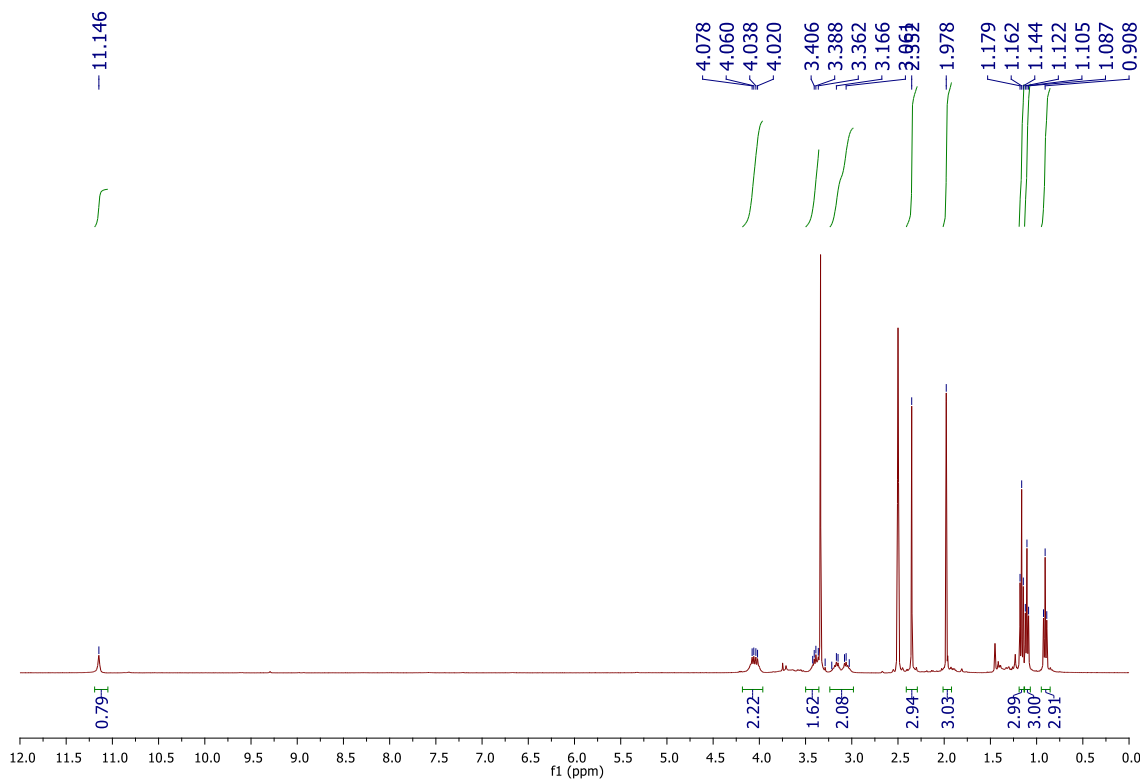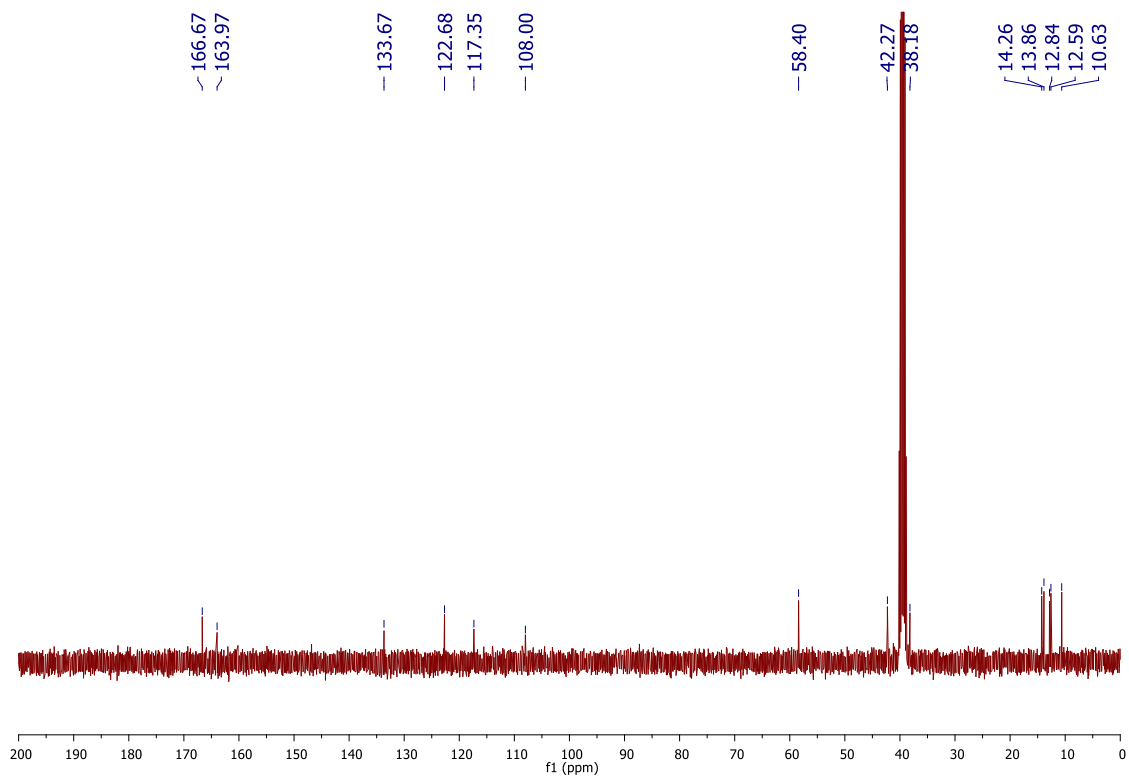

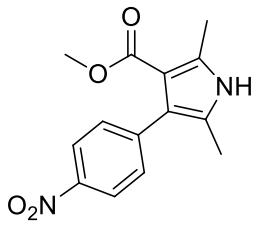

Methyl 2,5-dimethyl-4-(4-nitrophenyl)-1H-pyrrole-3-carboxylate (4f).

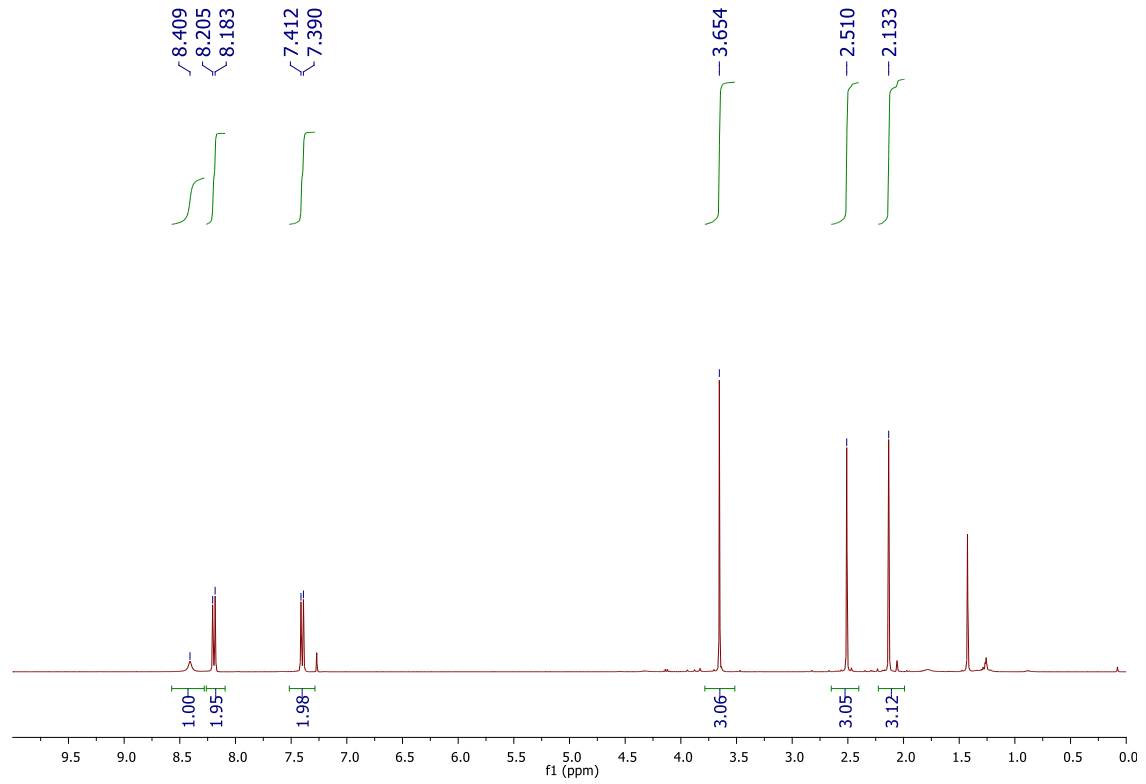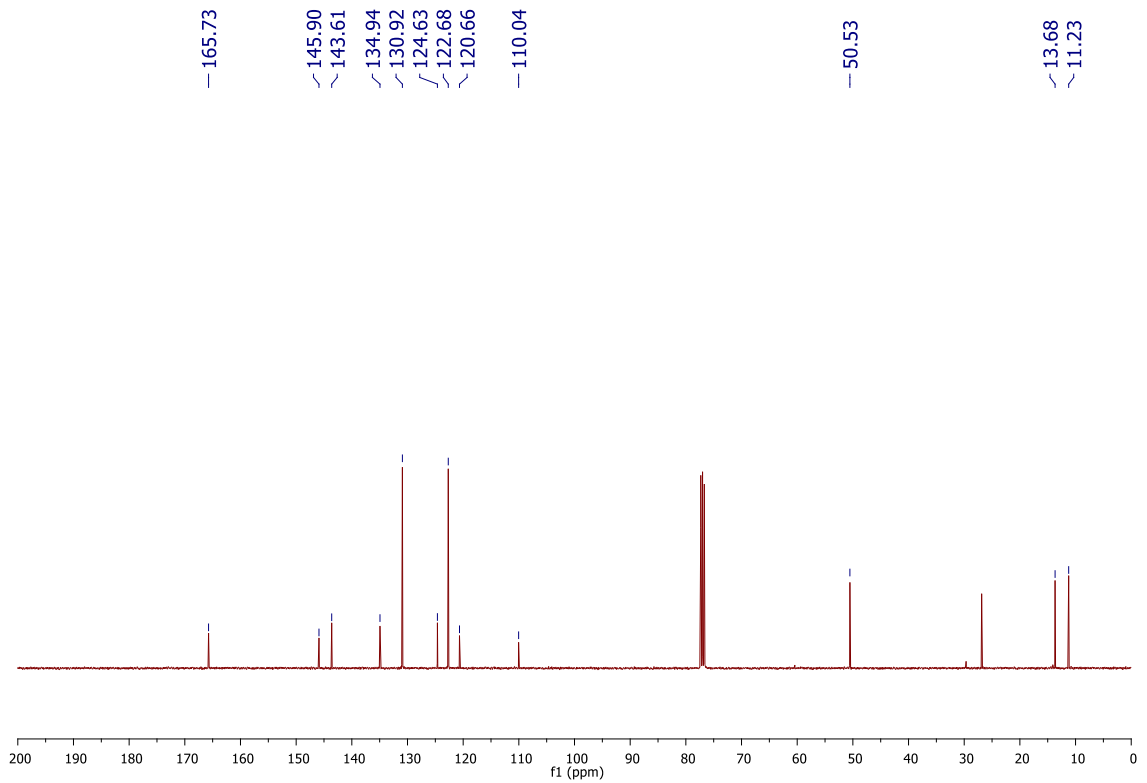



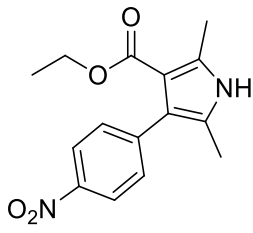

**Ethyl 2,5-dimethyl-4-(4-nitrophenyl)-1H-pyrrole-3-carboxylate (4g).<sup>3</sup>**

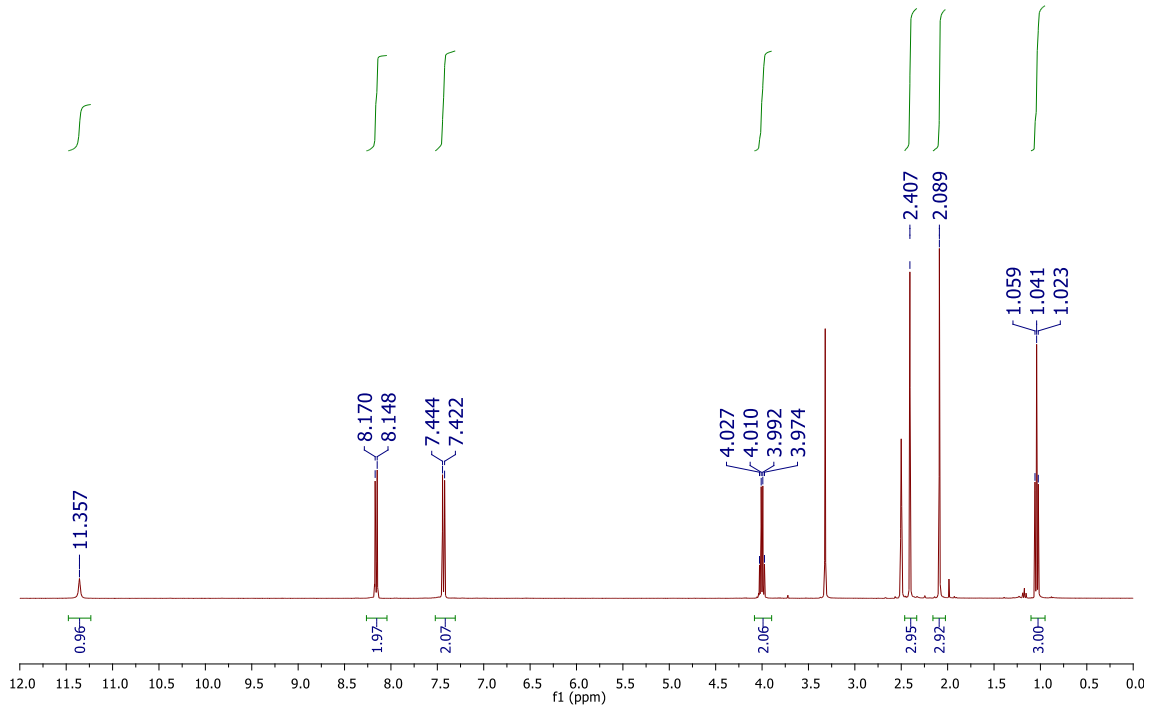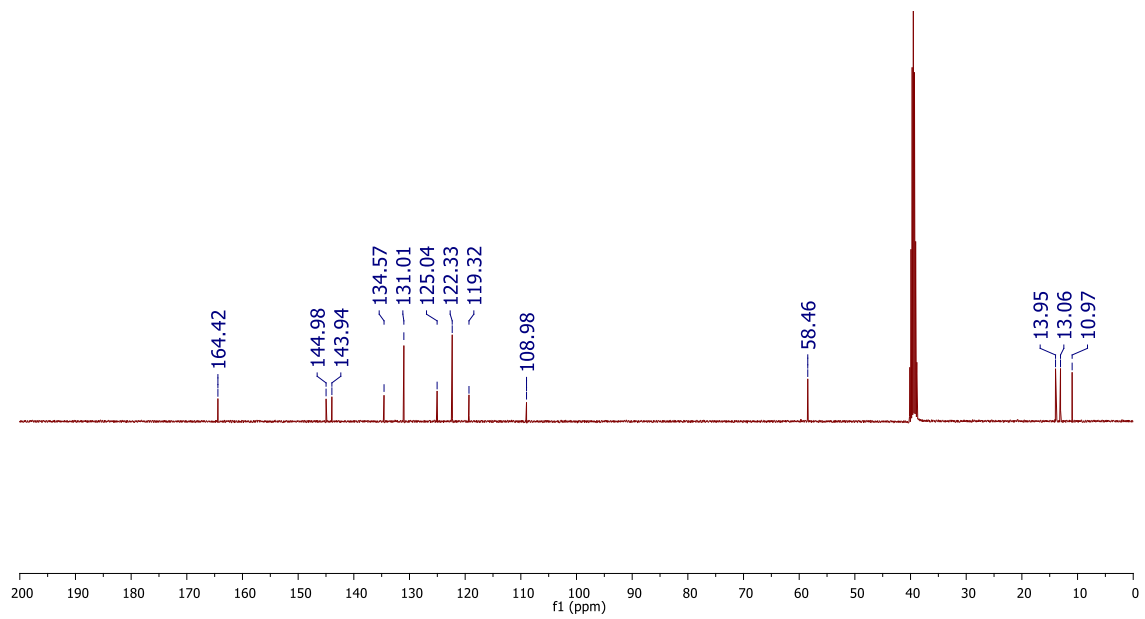

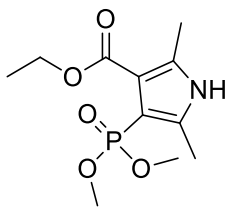

**Ethyl 4-(dimethoxyphosphoryl)-2,5-dimethyl-1H-pyrrole-3-carboxylate (4h).**

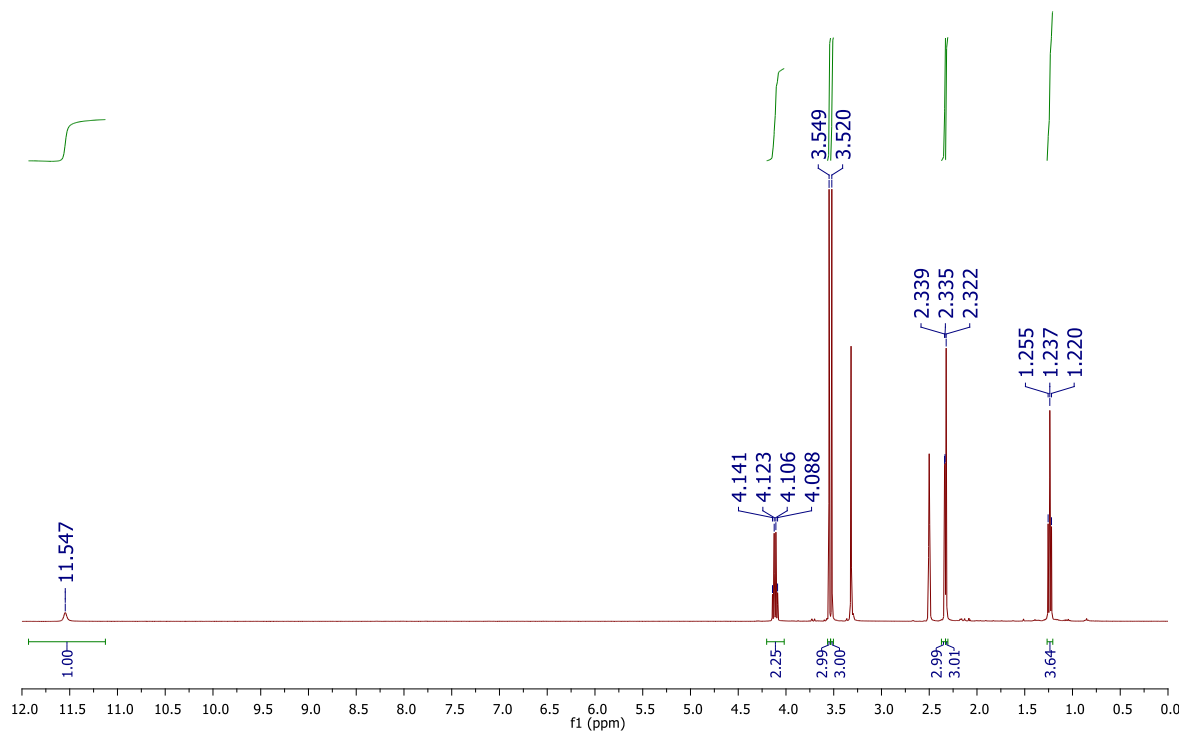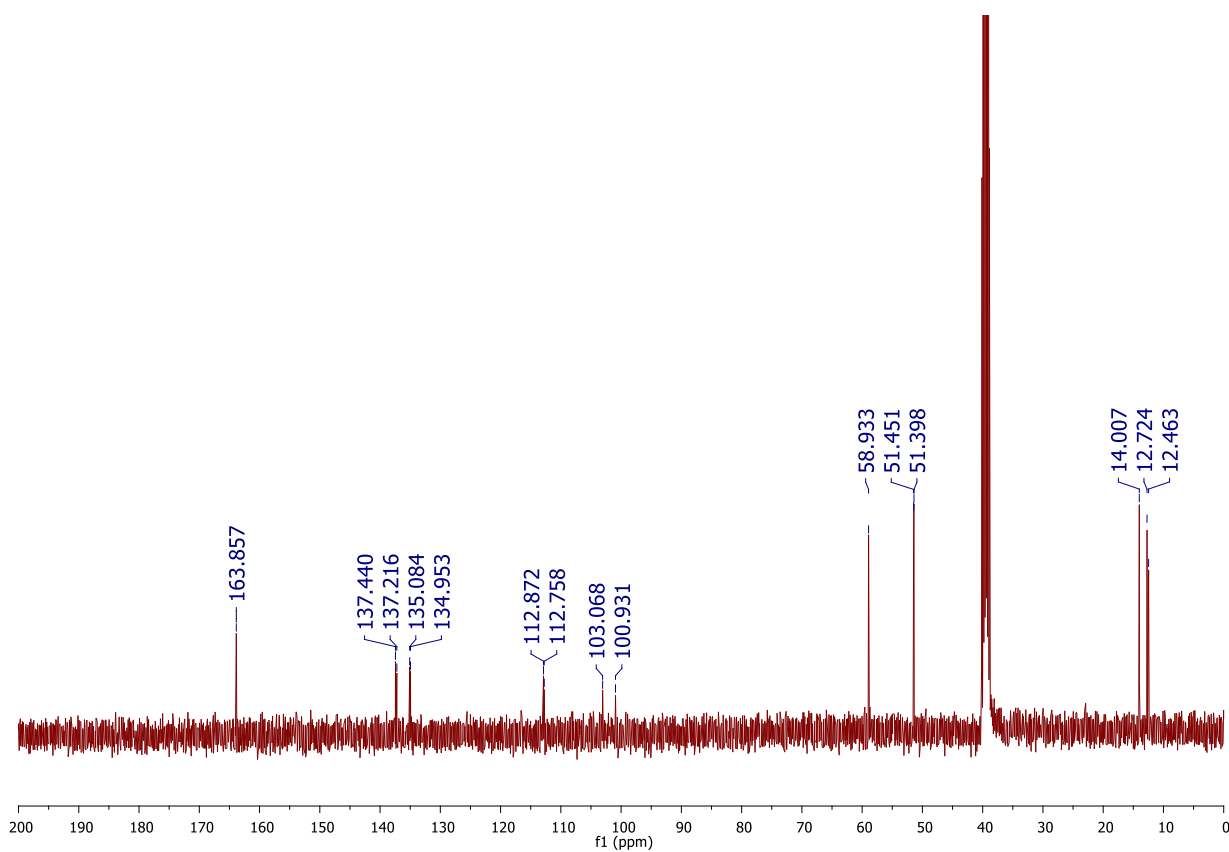

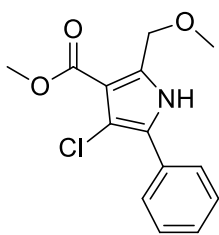

Methyl 4-chloro-2-(methoxymethyl)-5-phenyl-1H-pyrrole-3-carboxylate (4i).

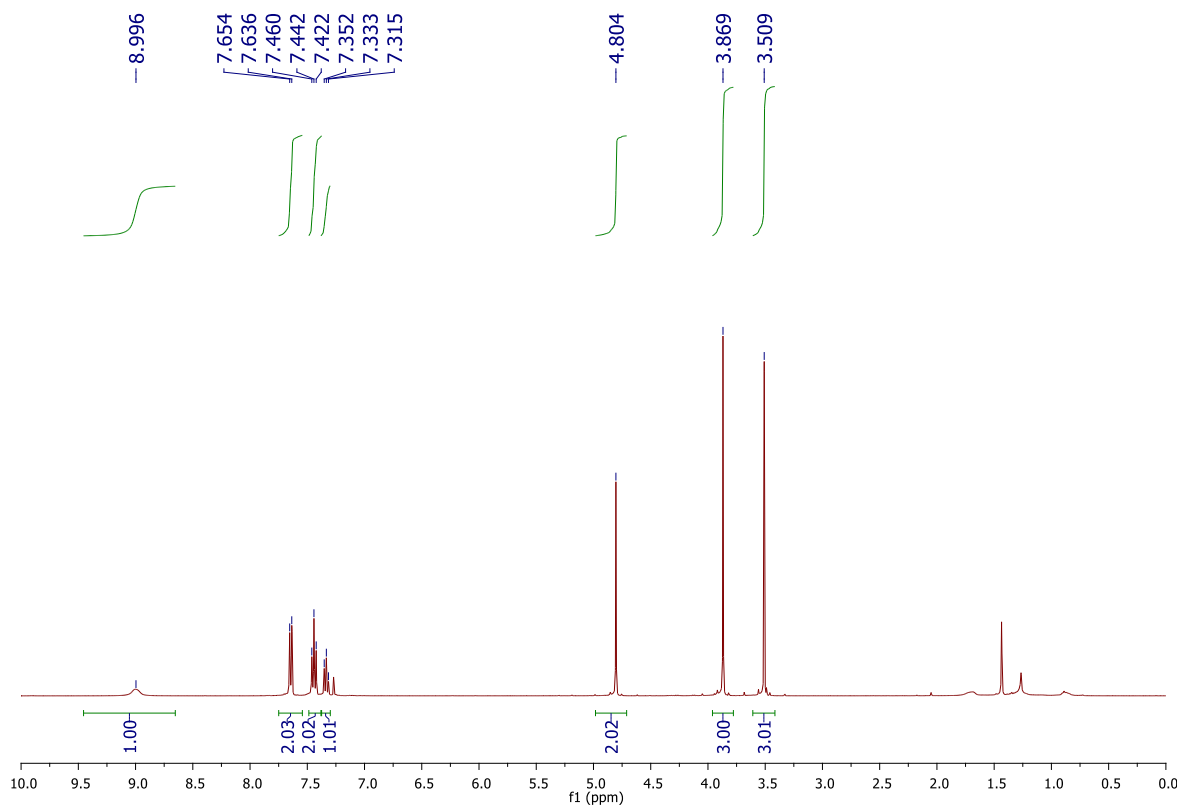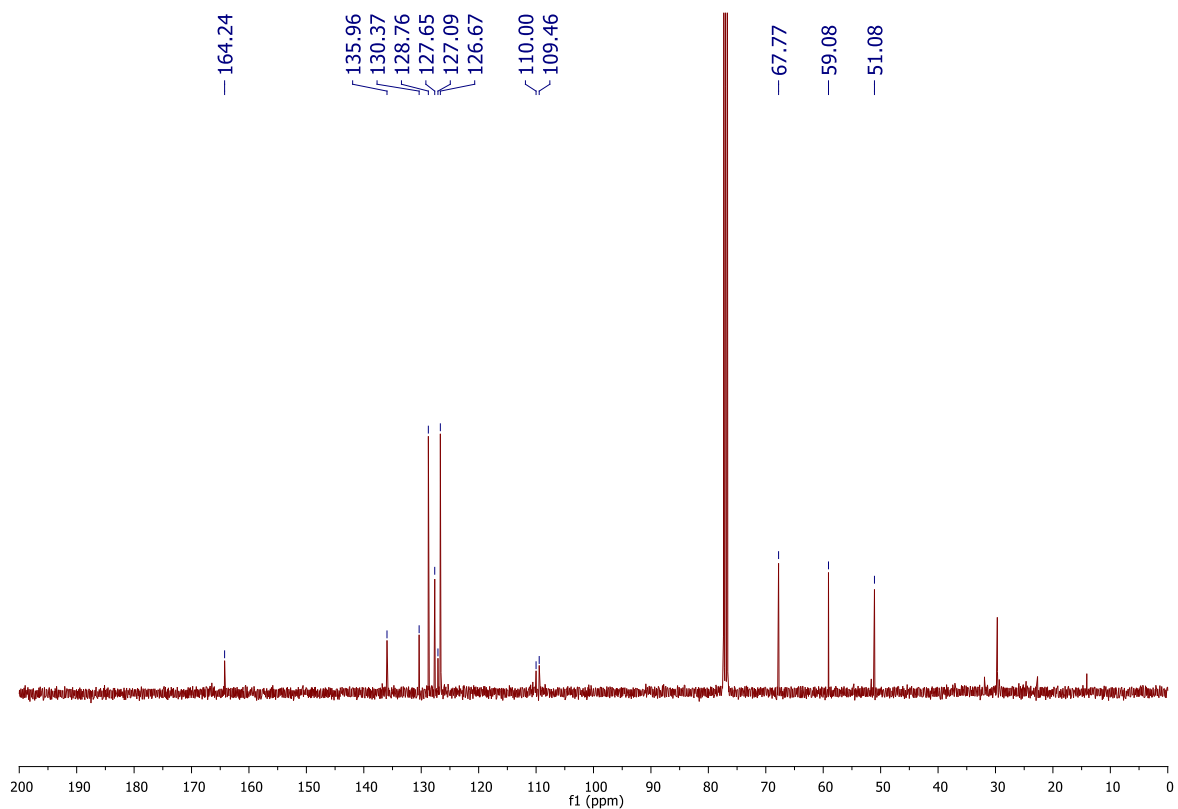

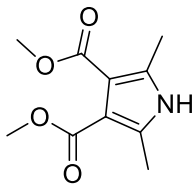

Dimethyl 2,5-dimethyl-1H-pyrrole-3,4-dicarboxylate (4j).<sup>4</sup>

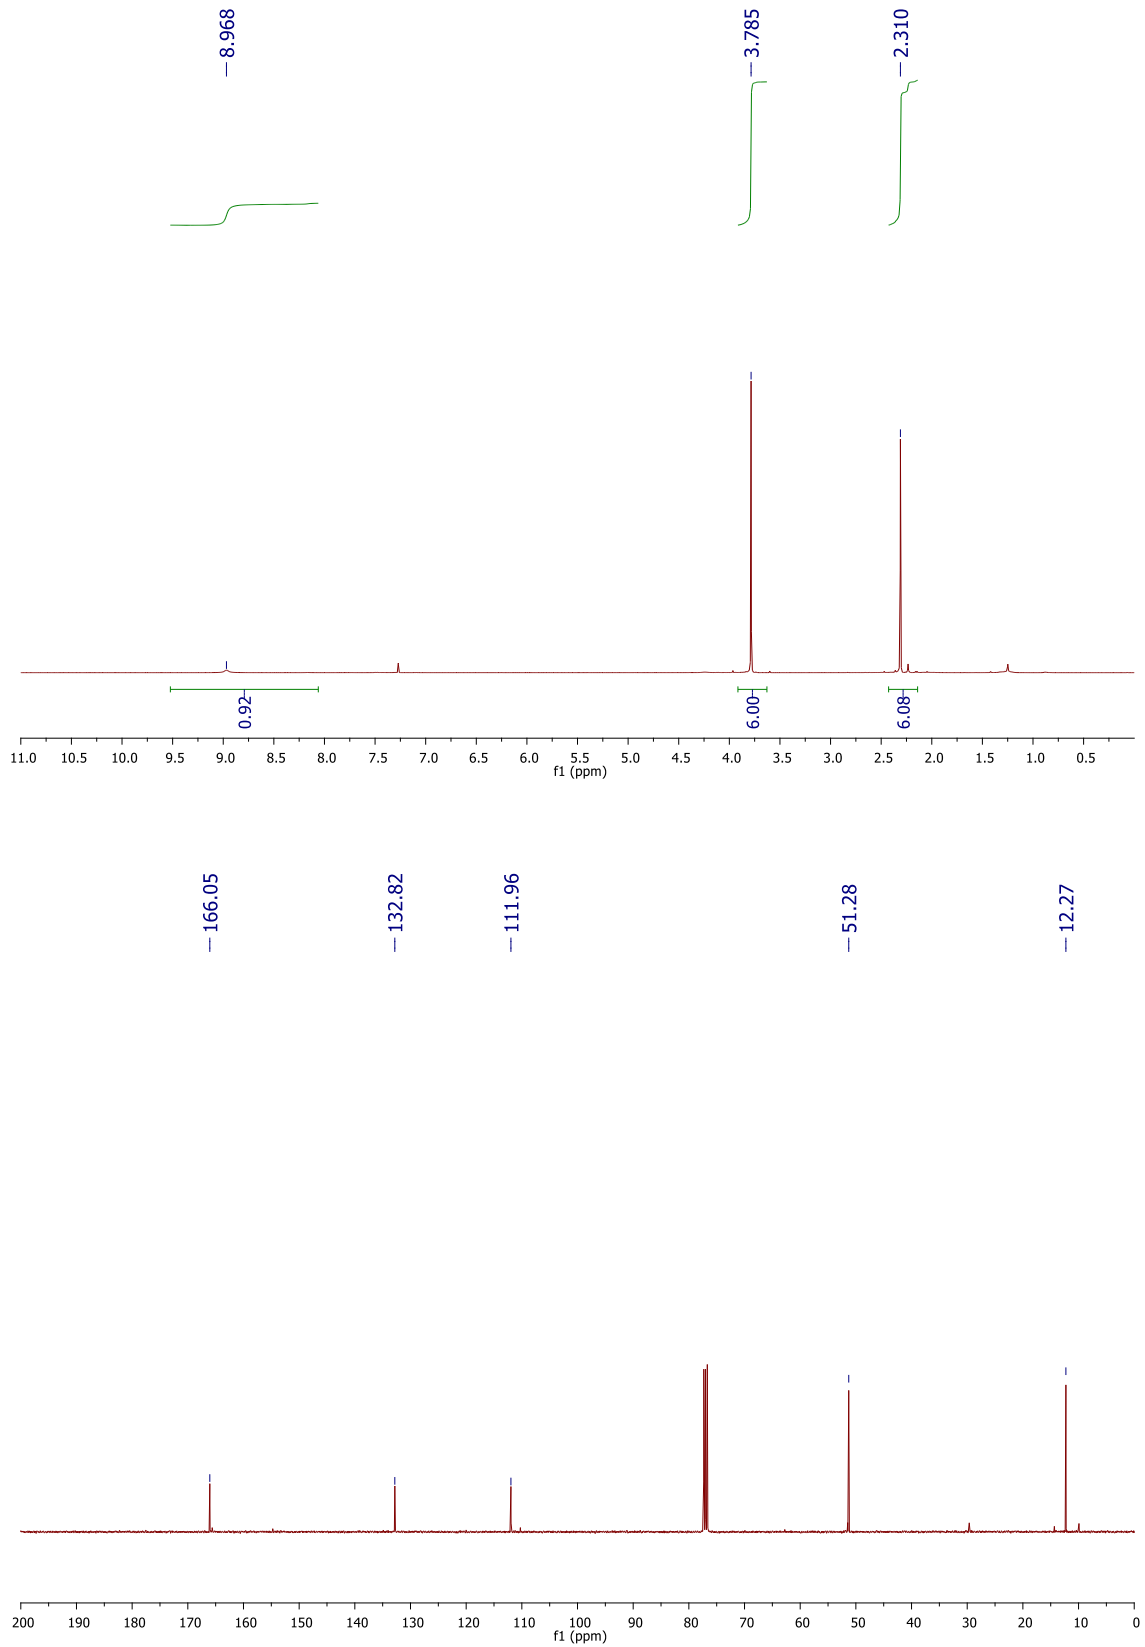

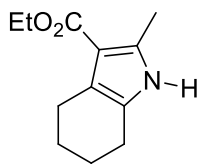

**Ethyl 2-methyl-4,5,6,7-tetrahydro-1H-indole-3-carboxylate (4k).**

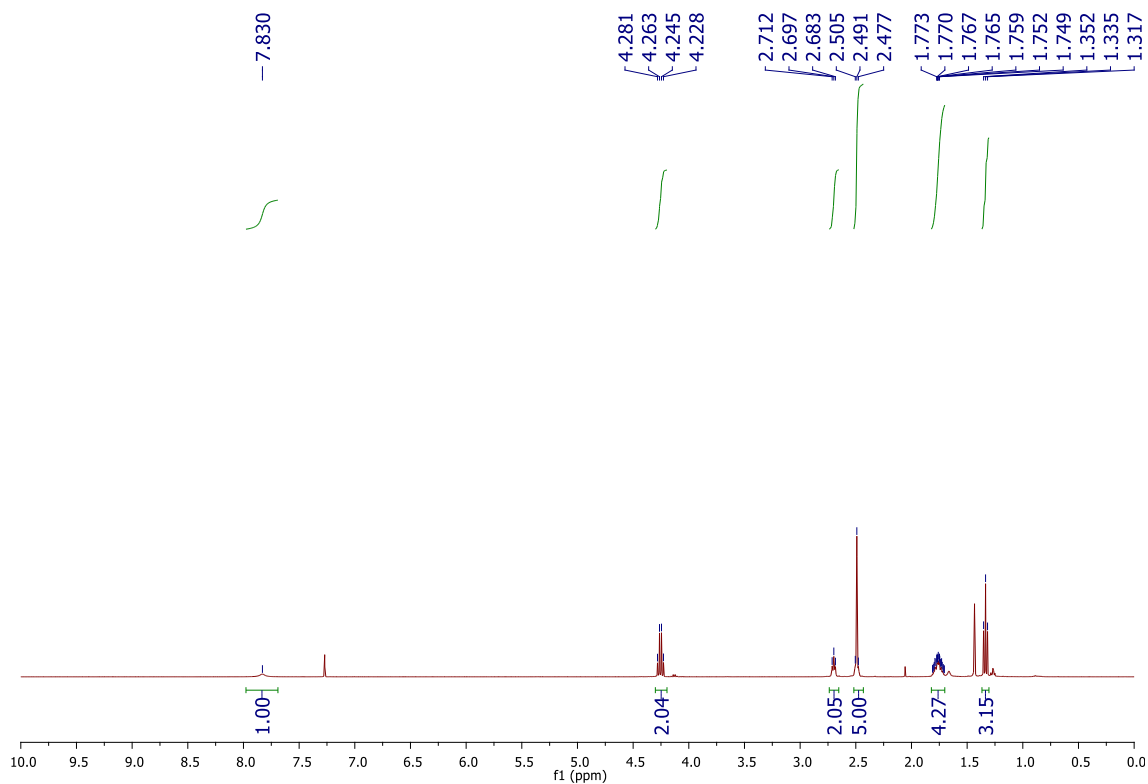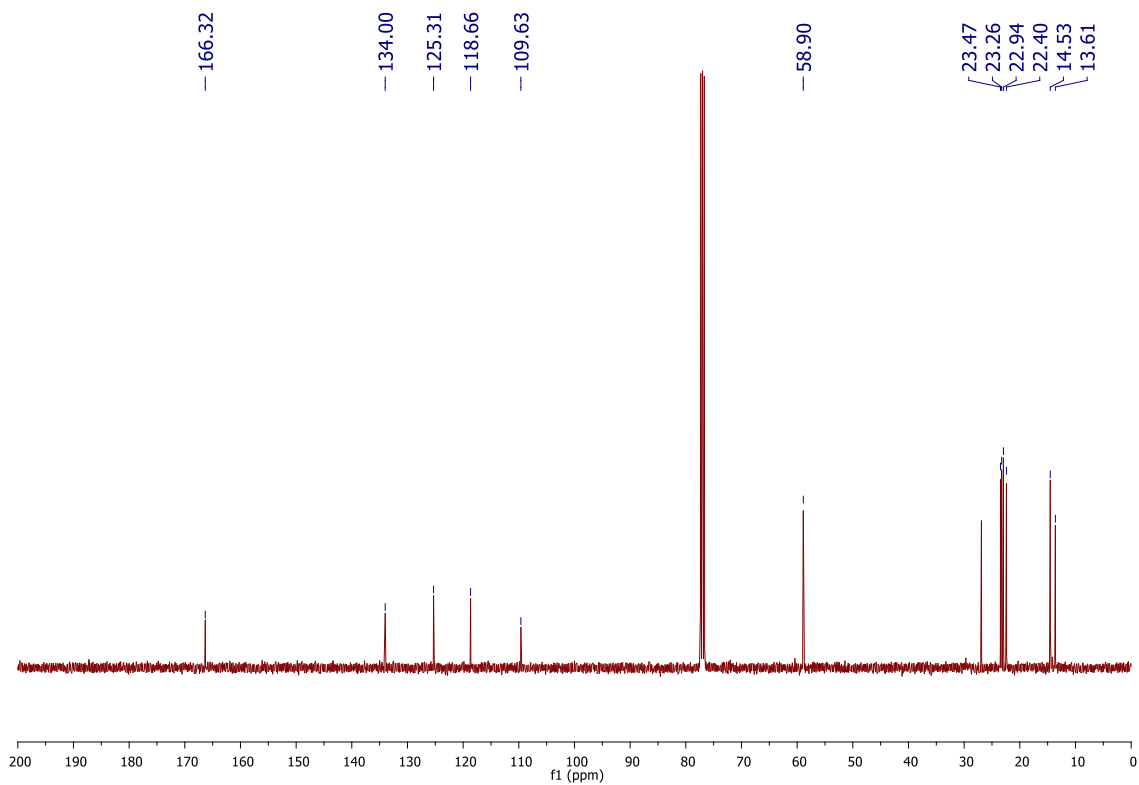

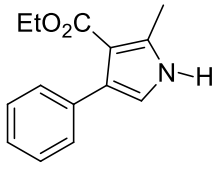

**Ethyl 2-methyl-4-phenyl-1H-indole-3-carboxylate (4l).**

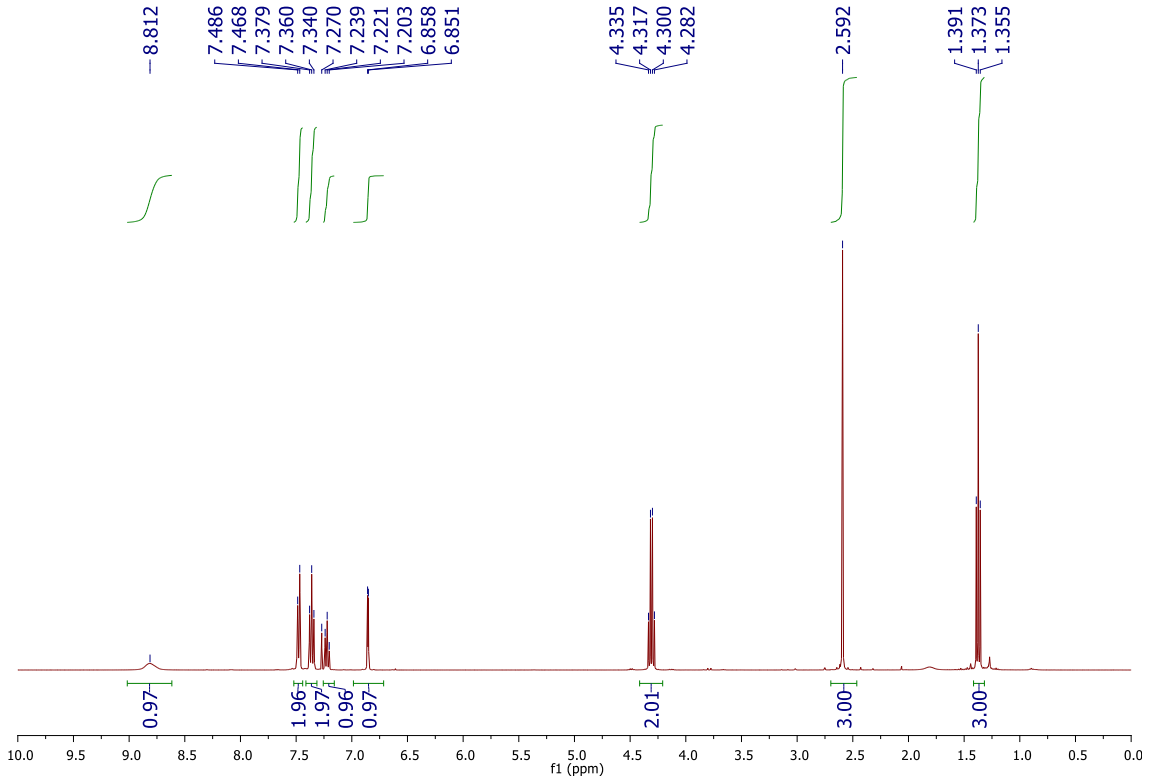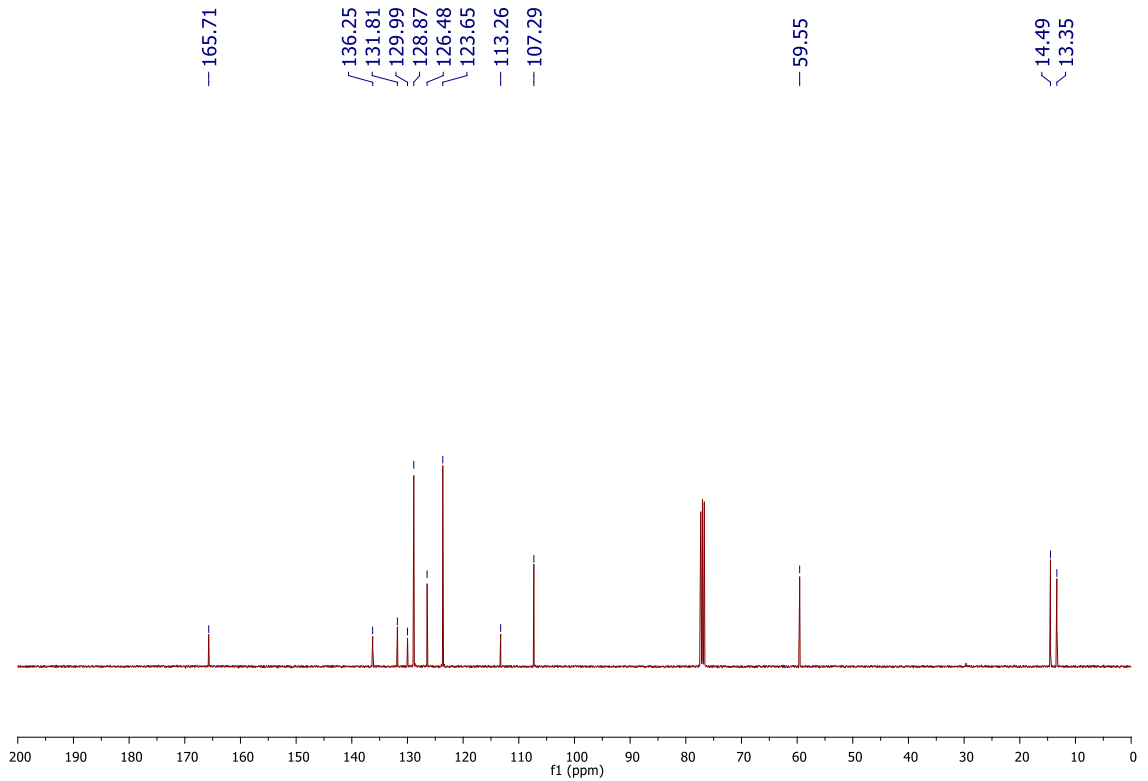

**8. General procedure for the synthesis of 1*H*-pyrrol-2-ones 10a–e by basic treatment of 1-amino-1*H*-pyrrol-2-ones 9a–e and DD 2a.** To a magnetically stirred solution of 1-amino-1*H*-pyrrol-2-ones **9a–e** (0.5 mmol) in MeCN (10 mL), DD **2a** (1.0 mmol) and K<sub>2</sub>CO<sub>3</sub> (1.5 mmol) were added and then the reaction mixture was refluxed for 1 hour, until the TLC analysis revealed the disappearance of the starting reagent **9** and the formation of 1*H*-pyrrol-2-ones **10a–e**. After the filtration of K<sub>2</sub>CO<sub>3</sub>, the solvent was removed in vacuo; the so-formed products **10** were purified by silica gel column chromatography using cyclohexane/ethyl acetate mixtures as eluent and then were crystallized from ethyl acetate/petroleum ether.

**9. Spectral data of 1*H*-pyrrol-2-ones 10a–e.**

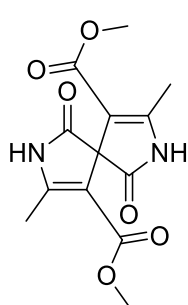

**Dimethyl 3,8-dimethyl-1,6-dioxo-2,7-diazaspiro[4.4]nona-3,8-diene-4,9-dicarboxylate (10a).** The compound was obtained as yellow solid (92.5 mg, 63%); mp: 140–142 °C; <sup>1</sup>H NMR (400 MHz, DMSO-*d*<sub>6</sub>, 25 °C): δ = 2.32 (s, 6H, 2CH<sub>3</sub>), 3.54 (s, 6H, 2OCH<sub>3</sub>), 10.64 (s, 2H, NH); <sup>13</sup>C NMR (100 MHz, CDCl<sub>3</sub>, 25 °C): δ = 13.4 (q), 50.7 (q), 64.8 (s), 105.6 (s), 156.3 (s), 162.8 (s), 173.2 (s); IR (nujol): ν<sub>max</sub> = 3313, 3252, 1760, 1739, 1713, 1704 cm<sup>-1</sup>; MS *m/z* (ESI): 295.11 (M + H<sup>+</sup>); anal. calcd. for C<sub>13</sub>H<sub>14</sub>N<sub>2</sub>O<sub>6</sub> (294.08): C 53.06, H 4.80, N 9.52; found: C 53.18, H 4.75, N 9.44.

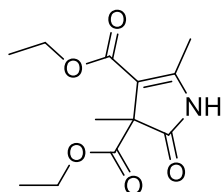

**Diethyl 3,5-dimethyl-2-oxo-2,3-dihydro-1*H*-pyrrole-3,4-dicarboxylate (10b).**<sup>5</sup> The compound was obtained as white solid (117.3 mg, 92%); mp: 104–105 °C; <sup>1</sup>H NMR (400 MHz, DMSO-*d*<sub>6</sub>, 25 °C): δ = 1.09 (t, *J*=7.2 Hz, 3H, OCH<sub>2</sub>CH<sub>3</sub>), 1.16 (t, *J*=7.2 Hz, 3H, OCH<sub>2</sub>CH<sub>3</sub>), 1.41 (s, 3H, CH<sub>3</sub>), 2.30 (s, 3H, CH<sub>3</sub>), 4.00–4.11 (m, 4H, 2OCH<sub>2</sub>CH<sub>3</sub>), 10.62 (s, 1H, NH); <sup>13</sup>C NMR (100 MHz, CDCl<sub>3</sub>, 25 °C): δ = 13.0 (q), 13.9 (q), 14.1 (q), 19.0 (q), 56.3 (s), 59.0 (t), 60.9 (t), 109.7 (s), 154.3 (s), 162.6 (s), 168.2 (s), 176.3 (s); IR (nujol): ν<sub>max</sub> = 3142, 1723, 1645, 1634 cm<sup>-1</sup>; MS *m/z* (ESI): 256.44 (M + H<sup>+</sup>); anal. calcd. for C<sub>12</sub>H<sub>17</sub>NO<sub>5</sub> (255.27): C 56.46, H 6.71, N 5.49; found: C 56.62, H 6.77, N 5.41.

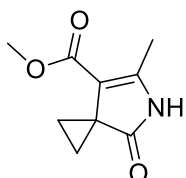

**Methyl 6-methyl-4-oxo-5-azaspiro[2.4]hept-6-ene-7-carboxylate (10c).** The compound was obtained as white solid (48.2 mg, 53%); mp: 142–144 °C; <sup>1</sup>H NMR (400 MHz, CDCl<sub>3</sub>, 25 °C): δ = 1.42–1.45 (m, 2H, CH<sub>2</sub>CH<sub>2</sub>), 1.88–1.91 (m, 2H, CH<sub>2</sub>CH<sub>2</sub>), 2.44 (s, 3H, CH<sub>3</sub>), 3.70 (s, 3H, OCH<sub>3</sub>), 9.20 (brs, 1H, NH); <sup>13</sup>C NMR (100 MHz, CDCl<sub>3</sub>, 25 °C): δ = 14.4 (q), 18.2 (t), 29.9 (s), 50.7 (q), 107.6 (s), 149.5 (s), 163.9 (s), 180.9 (s); IR (nujol): ν<sub>max</sub> = 3180, 1713, 1683 cm<sup>-1</sup>; MS *m/z* (ESI): 182.31 (M + H<sup>+</sup>); anal. calcd. for C<sub>9</sub>H<sub>11</sub>NO<sub>3</sub> (181.19): C 59.66, H 6.12, N 7.73; found: C 59.77, H 6.07, N 7.65.

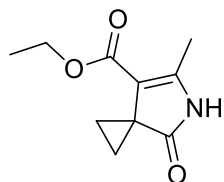

**Ethyl 6-methyl-4-oxo-5-azaspiro[2.4]hept-6-ene-7-carboxylate (10d).** The

compound was obtained as white solid (46.6 mg, 48%); mp: 130–132 °C; <sup>1</sup>H

NMR (400 MHz, DMSO-*d*<sub>6</sub>, 25 °C): δ = 1.13–1.16 (m, 2H, CH<sub>2</sub>CH<sub>2</sub>), 1.19 (t,

*J*=7.2 Hz, 3H, OCH<sub>2</sub>CH<sub>3</sub>), 1.66–1.69 (m, 2H, CH<sub>2</sub>CH<sub>2</sub>), 2.32 (s, 3H, CH<sub>3</sub>), 4.05

(q, *J*=7.2 Hz, 2H, OCH<sub>2</sub>CH<sub>3</sub>), 10.53 (s, 1H, NH); <sup>13</sup>C NMR (100 MHz, CDCl<sub>3</sub>, 25 °C): δ = 13.8 (q),

14.1 (q), 16.3 (t), 28.8 (s), 58.8 (t), 105.1 (s), 151.3 (s), 162.7 (s), 178.7 (s); IR (nujol): ν<sub>max</sub> = 3190,

1719, 1693 cm<sup>-1</sup>; MS *m/z* (ESI): 196.42 (M + H<sup>+</sup>); anal. calcd. for C<sub>10</sub>H<sub>13</sub>NO<sub>3</sub> (195.21): C 61.53, H

6.71, N 7.18; found: C 61.38, H 6.75, N 7.13.

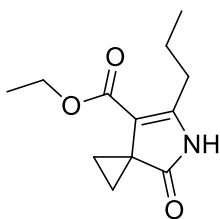

**Ethyl 4-oxo-6-propyl-5-azaspiro[2.4]hept-6-ene-7-carboxylate (10e).** The

compound was obtained as white solid (60.4 mg, 54%); mp: 70–72 °C; <sup>1</sup>H NMR

(400 MHz, CDCl<sub>3</sub>, 25 °C): δ = 1.00 (t, *J*=7.6 Hz, 3H, CH<sub>2</sub>CH<sub>2</sub>CH<sub>3</sub>), 1.28 (t, *J*=7.2

Hz, 3H, OCH<sub>2</sub>CH<sub>3</sub>), 1.42–1.45 (m, 2H, CH<sub>2</sub>CH<sub>2</sub>), 1.66 (sex, *J*=7.6 Hz, 2H,

CH<sub>2</sub>CH<sub>2</sub>CH<sub>3</sub>), 1.90–1.93 (m, 2H, CH<sub>2</sub>CH<sub>2</sub>), 2.85 (t, *J*=7.6 Hz, 2H, CH<sub>2</sub>CH<sub>2</sub>CH<sub>3</sub>),

4.16 (q, *J*=7.2 Hz, 2H, OCH<sub>2</sub>CH<sub>3</sub>), 9.13 (s, 1H, NH); <sup>13</sup>C NMR (100 MHz, CDCl<sub>3</sub>, 25 °C): δ = 13.8

(q), 14.2 (q), 18.3 (t), 21.2 (t), 29.7 (s), 29.7 (t), 29.9 (t), 59.4 (t), 107.4 (s), 153.6 (s), 163.4 (s), 180.9

(s); IR (nujol): ν<sub>max</sub> = 3160, 1688, 1634 cm<sup>-1</sup>; MS *m/z* (ESI): 224.77 (M + H<sup>+</sup>); anal. calcd. for

C<sub>12</sub>H<sub>17</sub>NO<sub>3</sub> (223.27): C 64.55, H 7.67, N 6.27; found: C 64.68, H 7.69, N 6.21.



10.  $^1\text{H}$  and  $^{13}\text{C}$  spectra of 1*H*-pyrrol-2-ones 10a–e.

Dimethyl 3,8-dimethyl-1,6-dioxo-2,7-diazaspiro[4.4]nona-3,8-diene-4,9-dicarboxylate (10a).

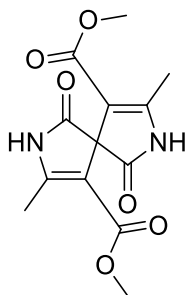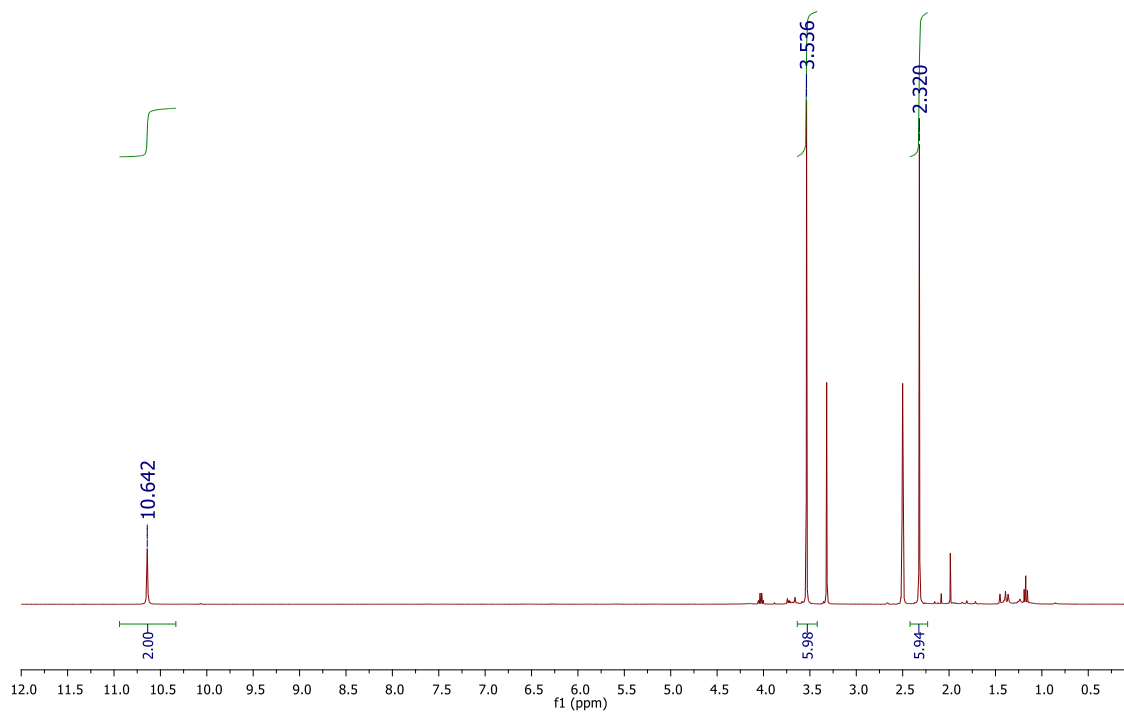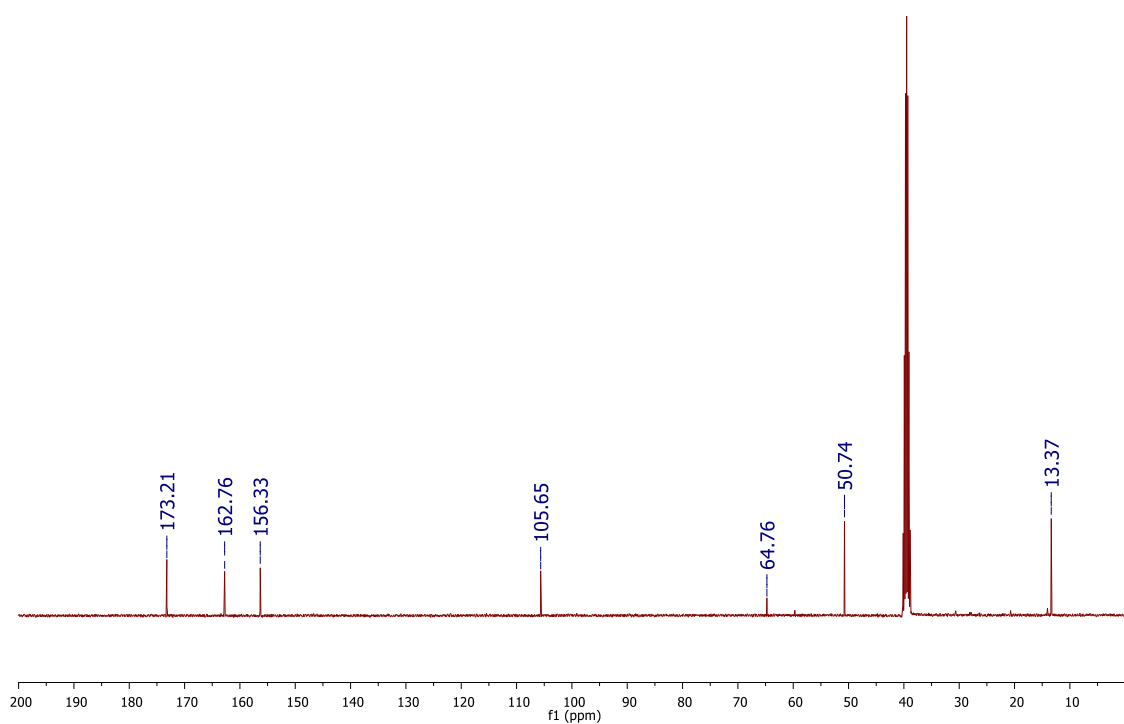

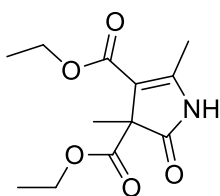

**Diethyl 3,5-dimethyl-2-oxo-2,3-dihydro-1H-pyrrole-3,4-dicarboxylate (10b).**

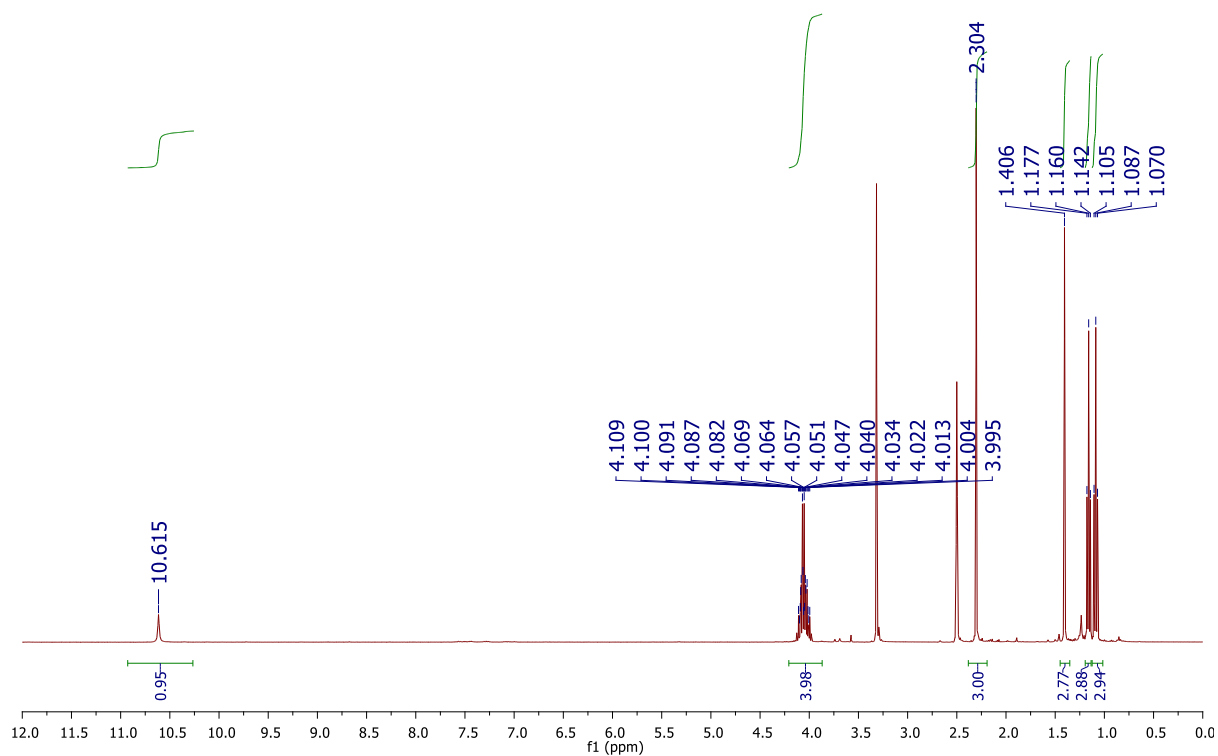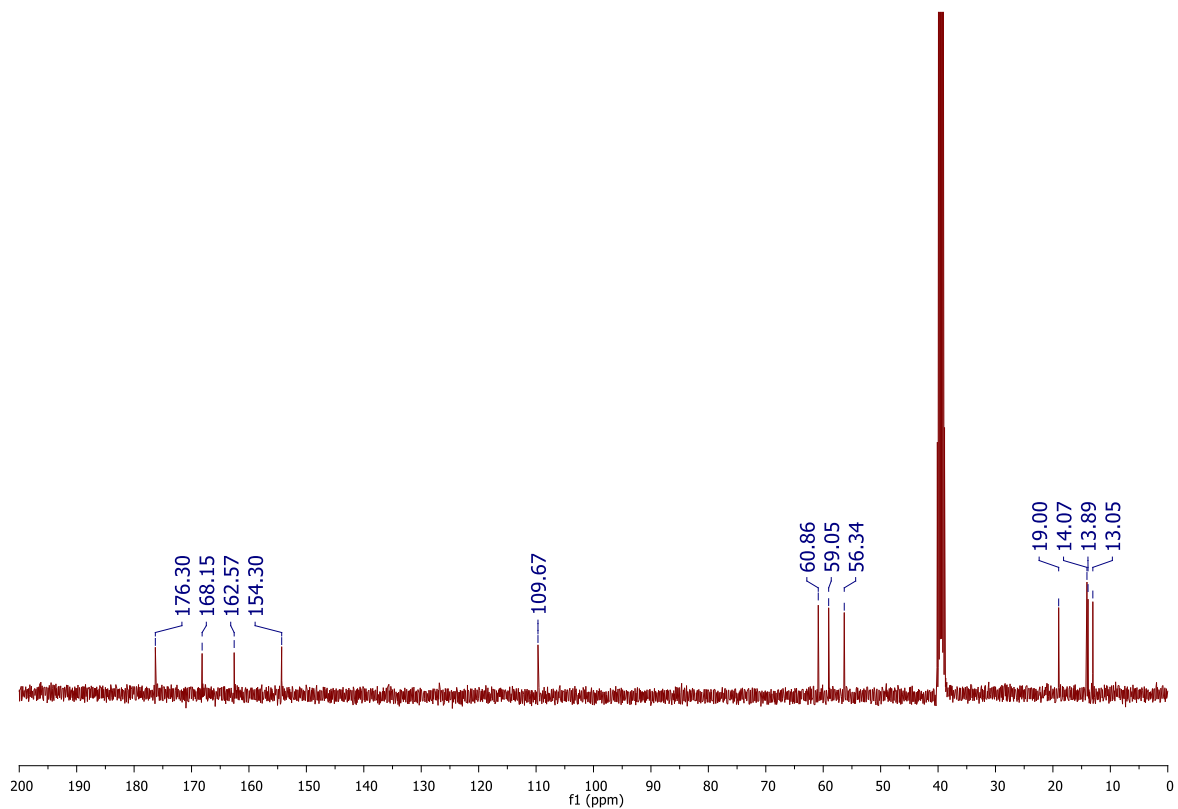

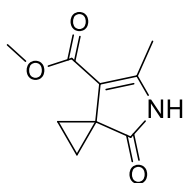

Methyl 6-methyl-4-oxo-5-azaspiro[2.4]hept-6-ene-7-carboxylate (10c).

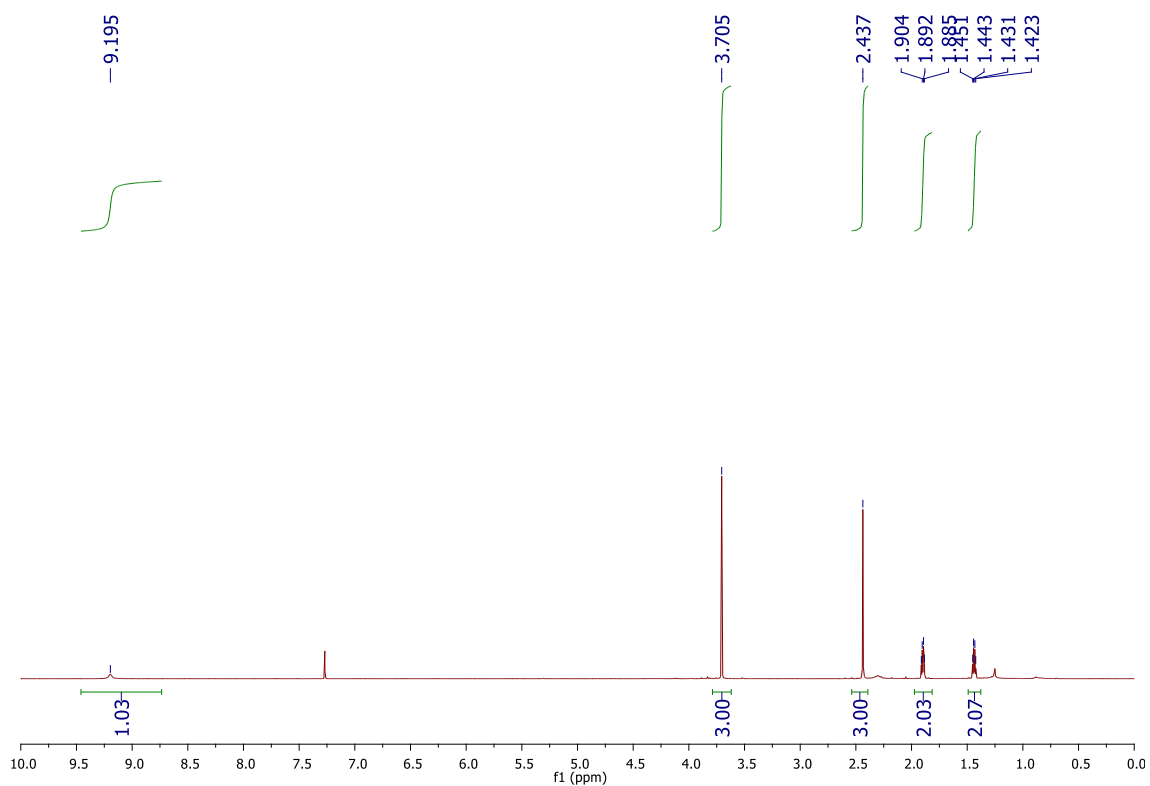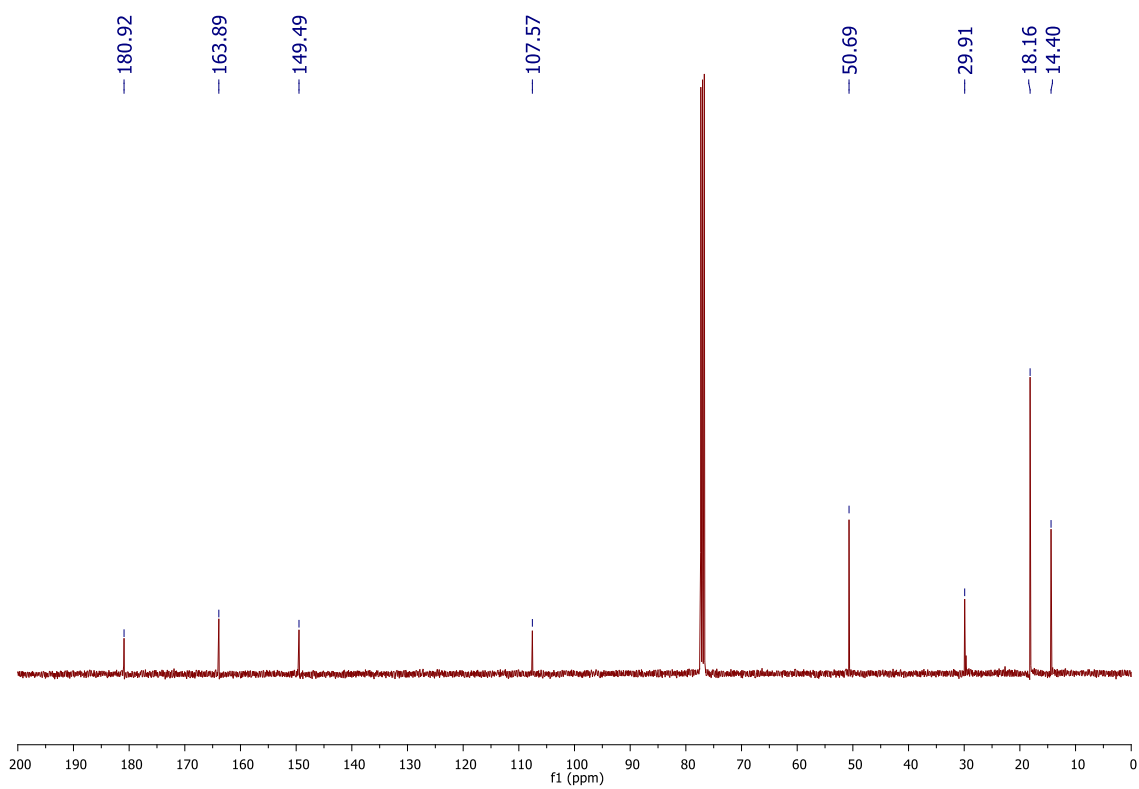

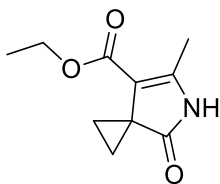

**Ethyl 6-methyl-4-oxo-5-azaspiro[2.4]hept-6-ene-7-carboxylate (10d).**

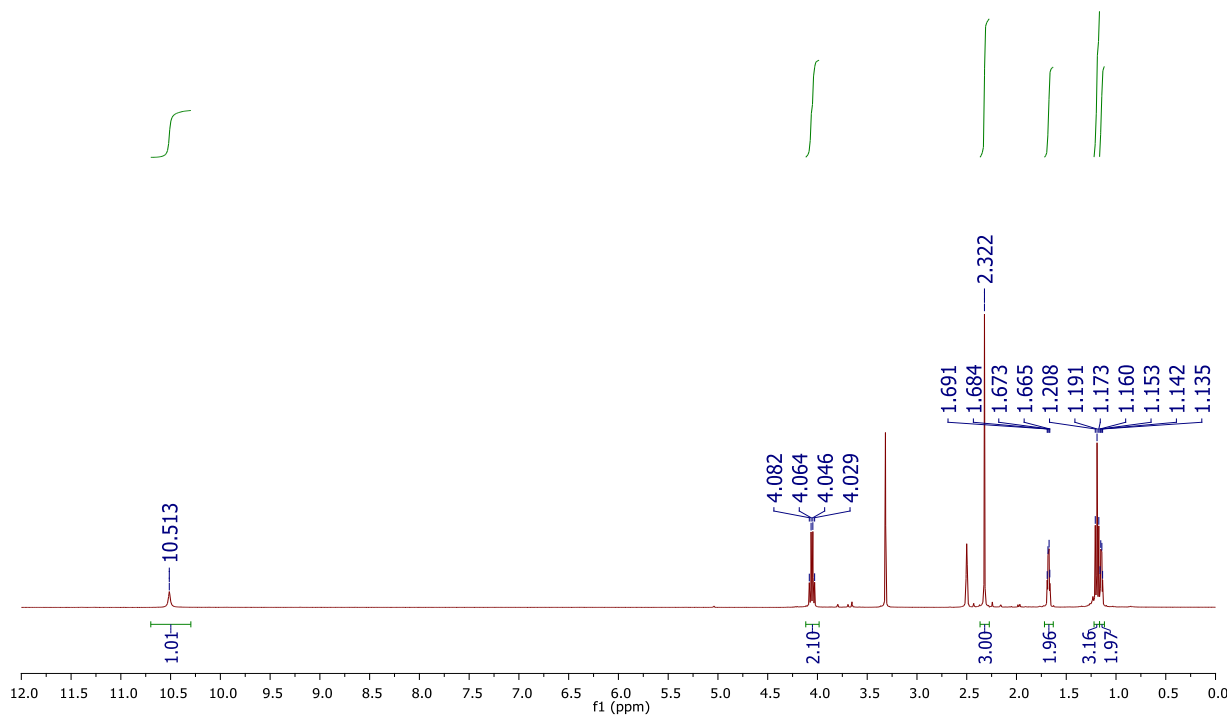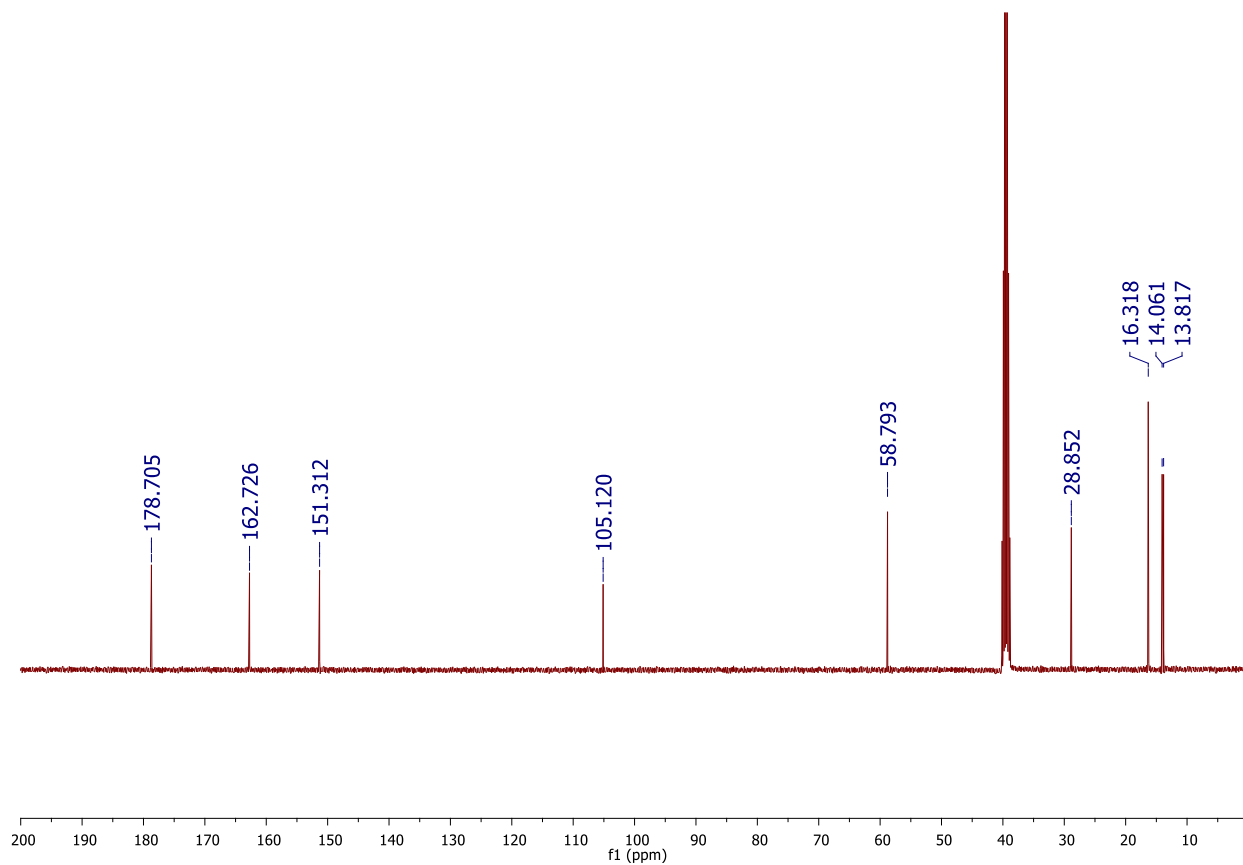

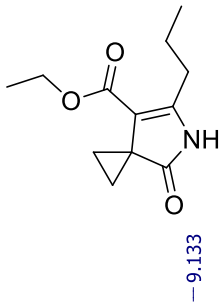

**Ethyl 4-oxo-6-propyl-5-azaspiro[2.4]hept-6-ene-7-carboxylate (10e).**

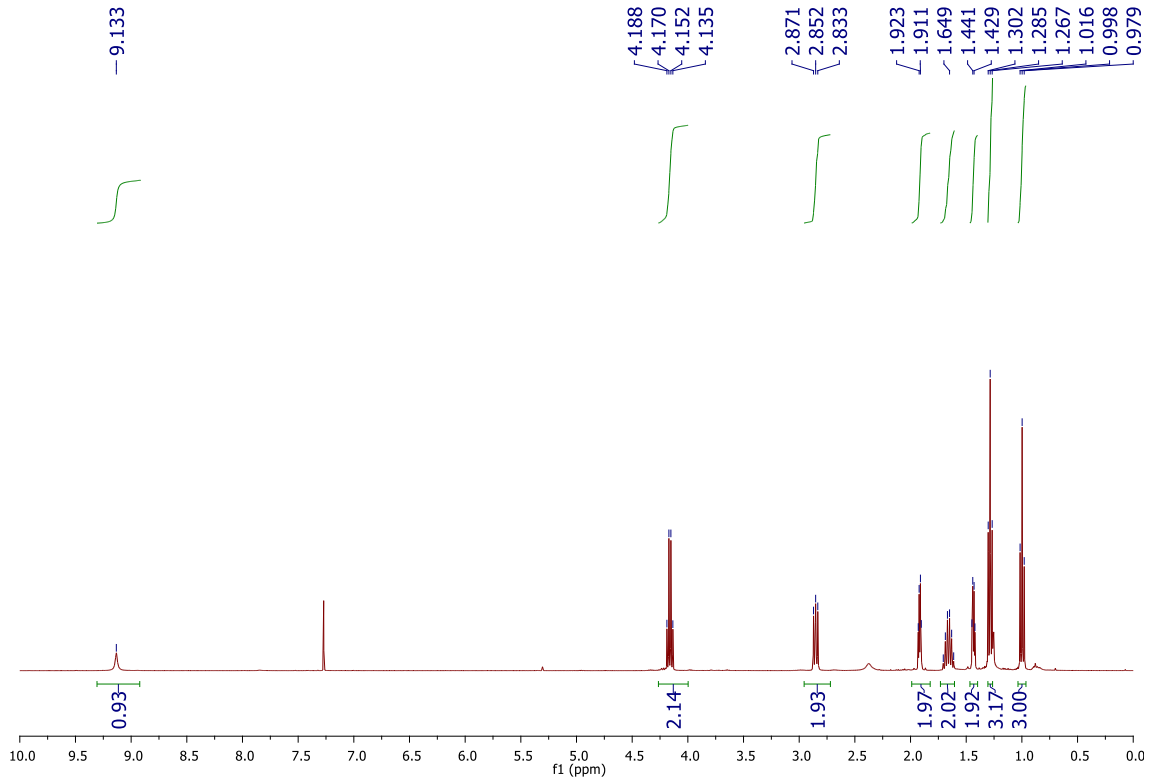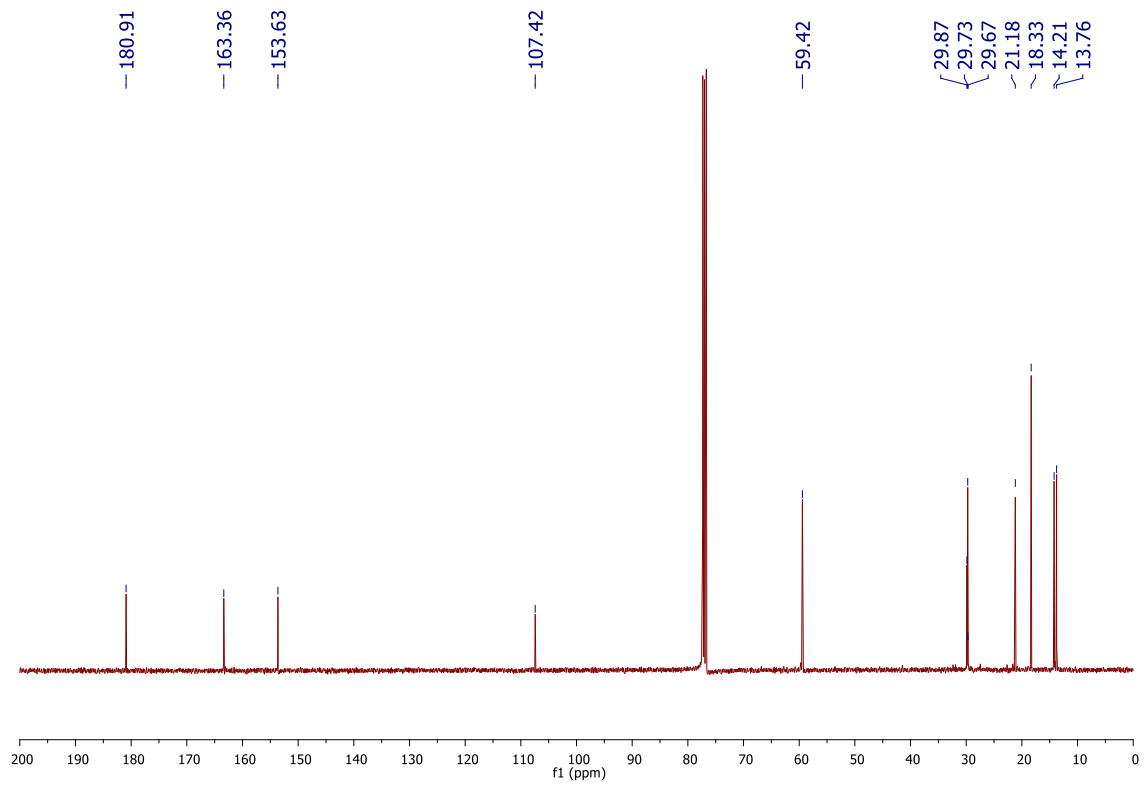

**11. General procedure for the synthesis of 1*H*-imidazoles 12a–c by basic treatment of 1-amino-1*H*-imidazoles 11a–c and DD 2a.** To a magnetically stirred solution of 1-amino-1*H*-imidazoles **11a–c** (0.5 mmol) in MeCN (10 mL), the DD **2a** (1.0 mmol) and K<sub>2</sub>CO<sub>3</sub> (1.5 mmol) were added and then the reaction mixture was refluxed for 1 hour, until the TLC analysis revealed the disappearance of the starting reagent **11** and the formation of 1*H*-imidazoles **12a–c**. After the filtration of K<sub>2</sub>CO<sub>3</sub>, the solvent was removed in vacuo; the so-formed products **12** were purified by silica gel column chromatography using cyclohexane/ethyl acetate mixtures as eluent and then were crystallized from ethyl acetate/petroleum ether.

**12. Spectral data of 1*H*-imidazoles 12a–c.**

**Methyl 5-methyl-2-phenyl-1*H*-imidazole-4-carboxylate (12a).** The compound was obtained as white solid (103.6 mg, 96%); mp: 154–156 °C; <sup>1</sup>H NMR (400 MHz, CDCl<sub>3</sub>, 25 °C): δ = 2.55 (s, 3H, CH<sub>3</sub>), 3.84 (s, 3H, OCH<sub>3</sub>), 7.34–7.36 (m, 3H<sub>ar</sub>), 7.41 (brs, 1H, NH), 7.90–7.92 (m, 2H<sub>ar</sub>); <sup>13</sup>C NMR (100 MHz, CDCl<sub>3</sub>, 25 °C): δ = 12.9 (q), 51.6 (q), 123.2 (s), 125.9 (d), 128.6 (s), 128.9 (d), 129.7 (d), 142.1 (s), 146.7 (s), 162.6 (s); IR (nujol): ν<sub>max</sub> = 3313, 1693, 1653 cm<sup>-1</sup>; MS *m/z* (ESI): 217.38 (M + H<sup>+</sup>); anal. calcd. for C<sub>12</sub>H<sub>12</sub>N<sub>2</sub>O<sub>2</sub> (216.24): C 66.65, H 5.59, N 12.96; found: C 66.73, H 5.64, N 12.89.

**Ethyl 5-methyl-2-phenyl-1*H*-imidazole-4-carboxylate (12b).** The compound was obtained as white solid (96.6 mg, 84%); mp: 183–185 °C; <sup>1</sup>H NMR (400 MHz, CDCl<sub>3</sub>, 25 °C): δ = 1.31 (t, *J*=7.2 Hz, 3H, OCH<sub>2</sub>CH<sub>3</sub>), 2.55 (s, 3H, CH<sub>3</sub>), 4.33 (q, *J*=7.2 Hz, 2H, OCH<sub>2</sub>CH<sub>3</sub>), 7.34–7.36 (m, 3H<sub>ar</sub>), 7.90–7.93 (m, 2H<sub>ar</sub>), 9.48 (brs, 1H, NH); <sup>13</sup>C NMR (100 MHz, CDCl<sub>3</sub>, 25 °C): δ = 12.7 (q), 14.3 (q), 60.8 (t), 122.8 (s), 126.2 (d), 127.8 (s), 128.9 (d), 130.0 (d), 141.7 (s), 146.4 (s), 161.6 (s); IR (nujol): ν<sub>max</sub> = 3328, 1729, 1644 cm<sup>-1</sup>; MS *m/z* (ESI): 231.44 (M + H<sup>+</sup>); anal. calcd. for C<sub>13</sub>H<sub>14</sub>N<sub>2</sub>O<sub>2</sub> (230.26): C 67.81, H 6.13, N 12.17; found: C 67.67, H 6.16, N 12.08.

**Methyl 5-ethyl-2-phenyl-1*H*-imidazole-4-carboxylate (12c).** The compound was obtained as white solid (112.6 mg, 98%); mp: 172–174 °C; <sup>1</sup>H NMR (400 MHz, CDCl<sub>3</sub>, 25 °C): δ = 1.31 (t, *J*=7.6 Hz, 3H, CH<sub>2</sub>CH<sub>3</sub>), 3.03 (q, *J*=7.6 Hz, 2H, CH<sub>2</sub>CH<sub>3</sub>), 3.88 (s, 3H, OCH<sub>3</sub>), 4.64 (brs, 1H, NH), 7.37–7.39 (m, 2H<sub>ar</sub>), 7.97–7.99 (m, 3H<sub>ar</sub>); <sup>13</sup>C NMR (100 MHz, CDCl<sub>3</sub>, 25 °C): δ = 13.9 (q), 20.1 (t), 51.8 (q), 126.4 (d), 128.7 (s), 129.0 (d), 130.4 (d), 146.2 (s), 147.2 (s), 160.2 (s), 161.5 (s); IR (nujol): ν<sub>max</sub> = 3314, 1739, 1634 cm<sup>-1</sup>; MS *m/z* (ESI): 231.08 (M + H<sup>+</sup>); anal. calcd. for C<sub>13</sub>H<sub>14</sub>N<sub>2</sub>O<sub>4</sub> (230.26): C 67.81, H 6.13, N 12.17; found: C 67.73, H 6.09, N 12.24.

13.  $^1\text{H}$  and  $^{13}\text{C}$  spectra of 1*H*-imidazoles 12a–c.

Methyl 5-methyl-2-phenyl-1*H*-imidazole-4-carboxylate (12a).

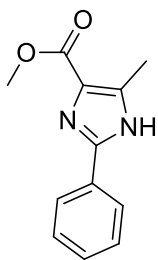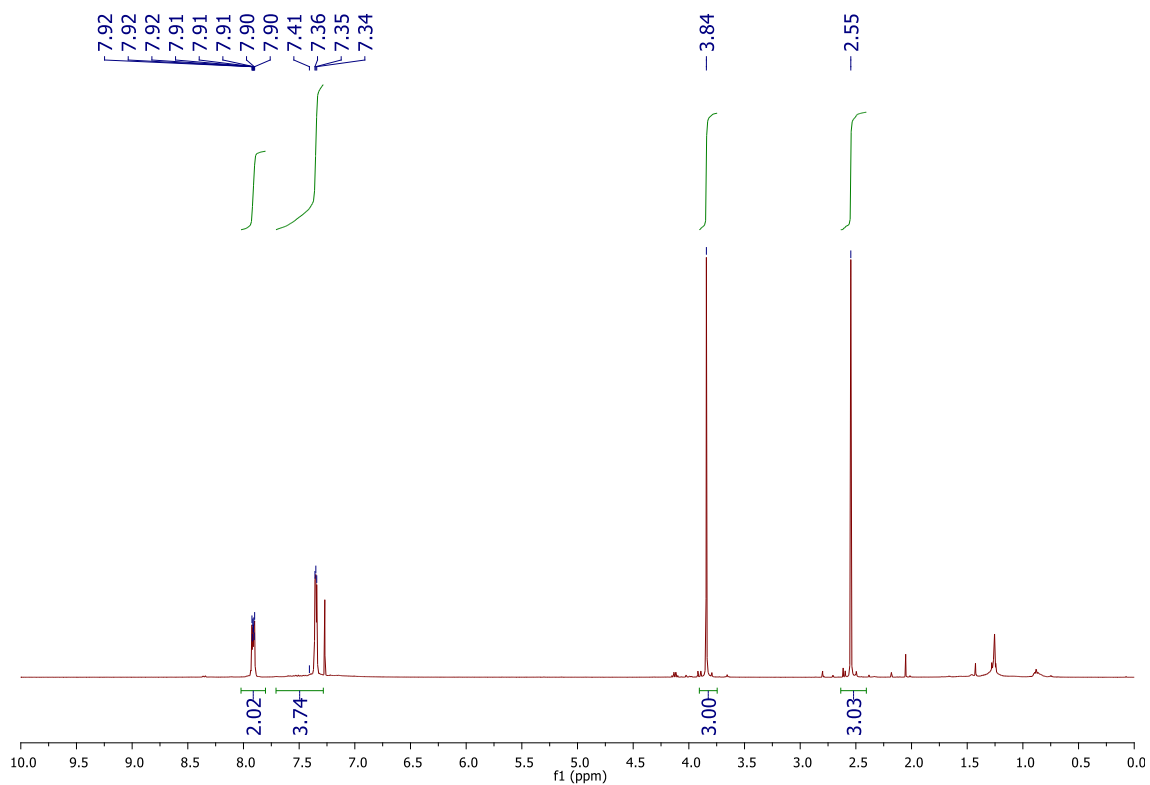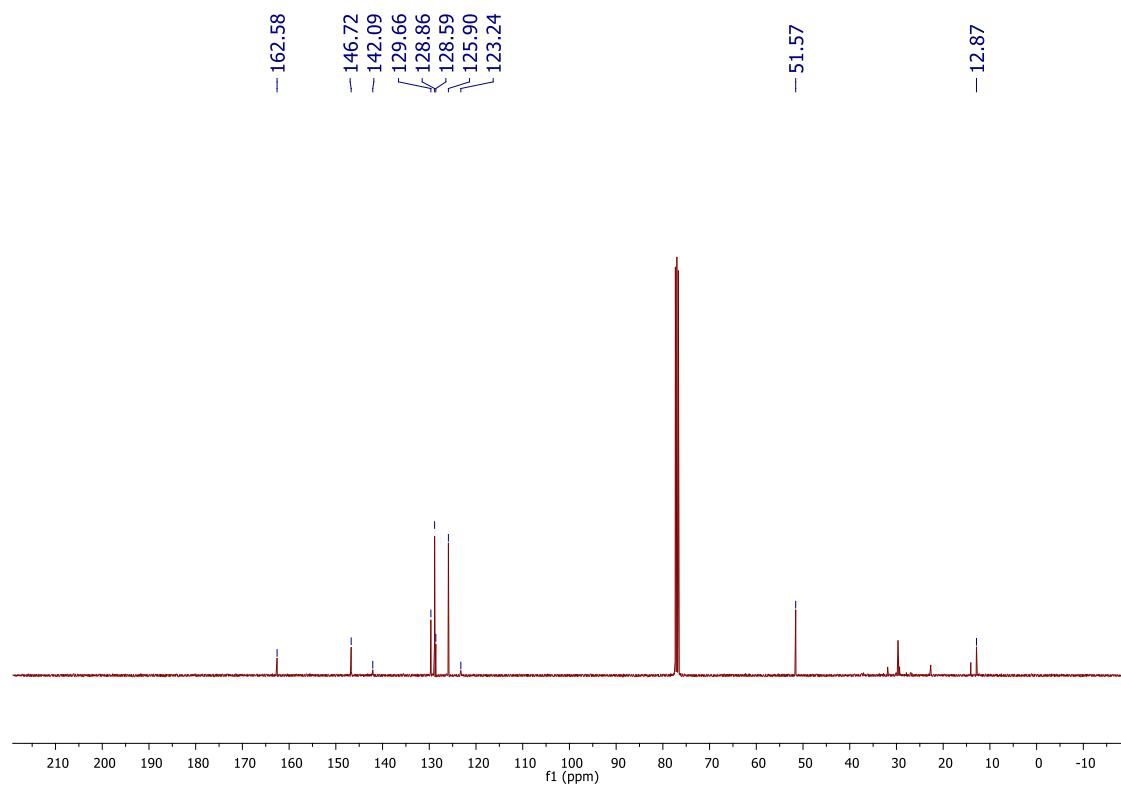

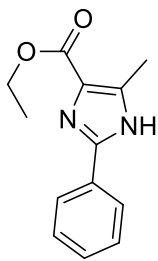

**Ethyl 5-methyl-2-phenyl-1*H*-imidazole-4-carboxylate (12b).**

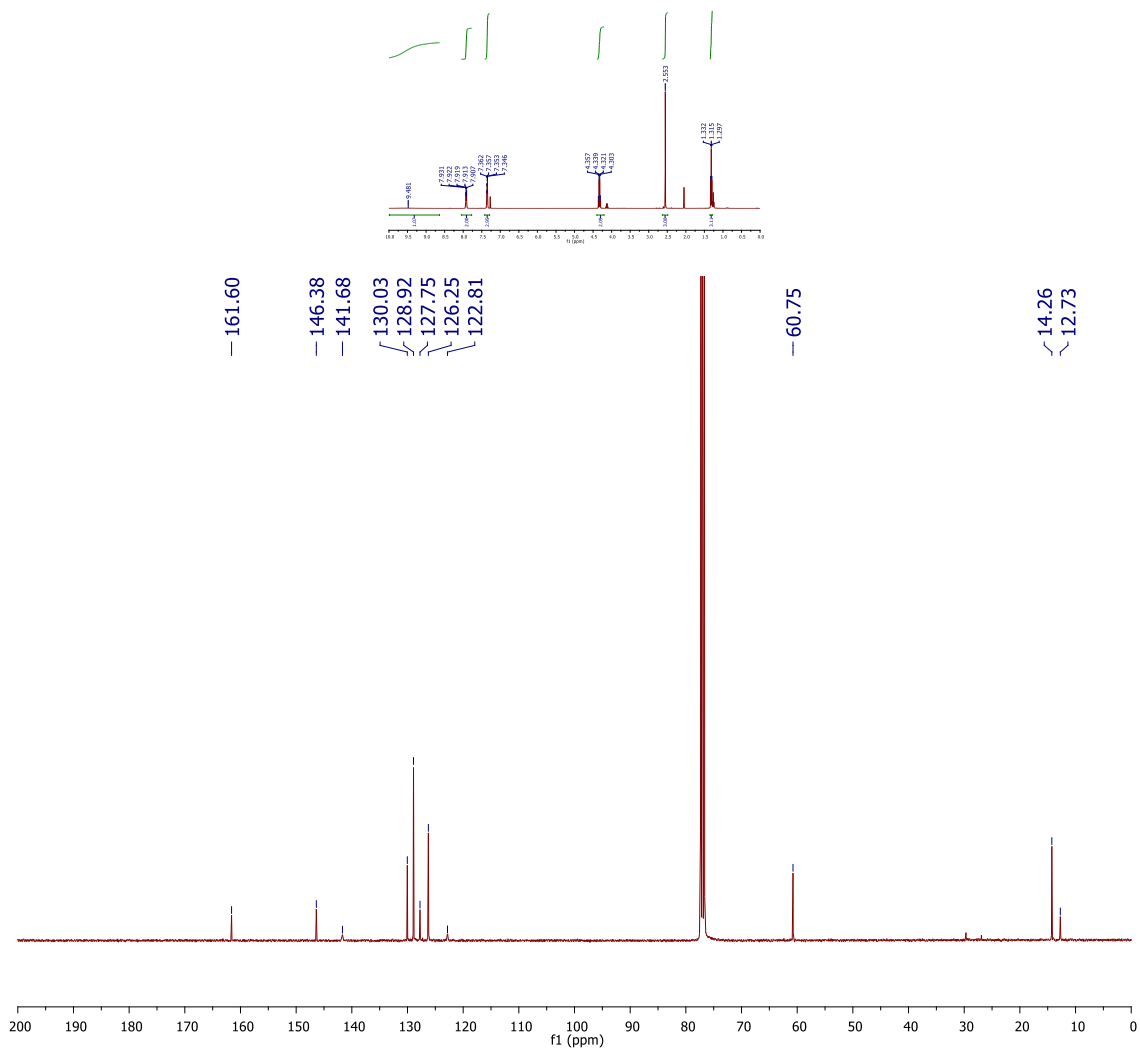



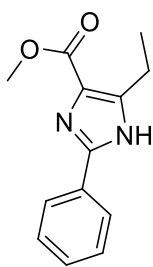

Methyl 5-ethyl-2-phenyl-1H-imidazole-4-carboxylate (12c).

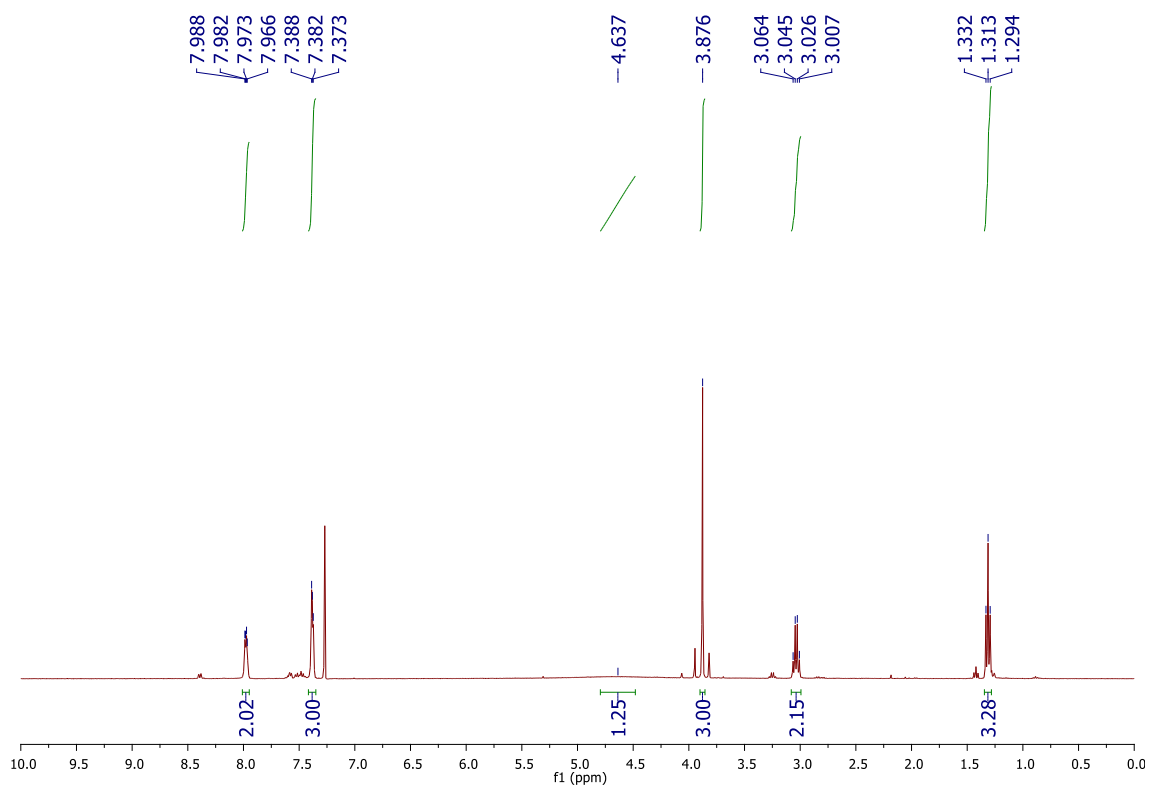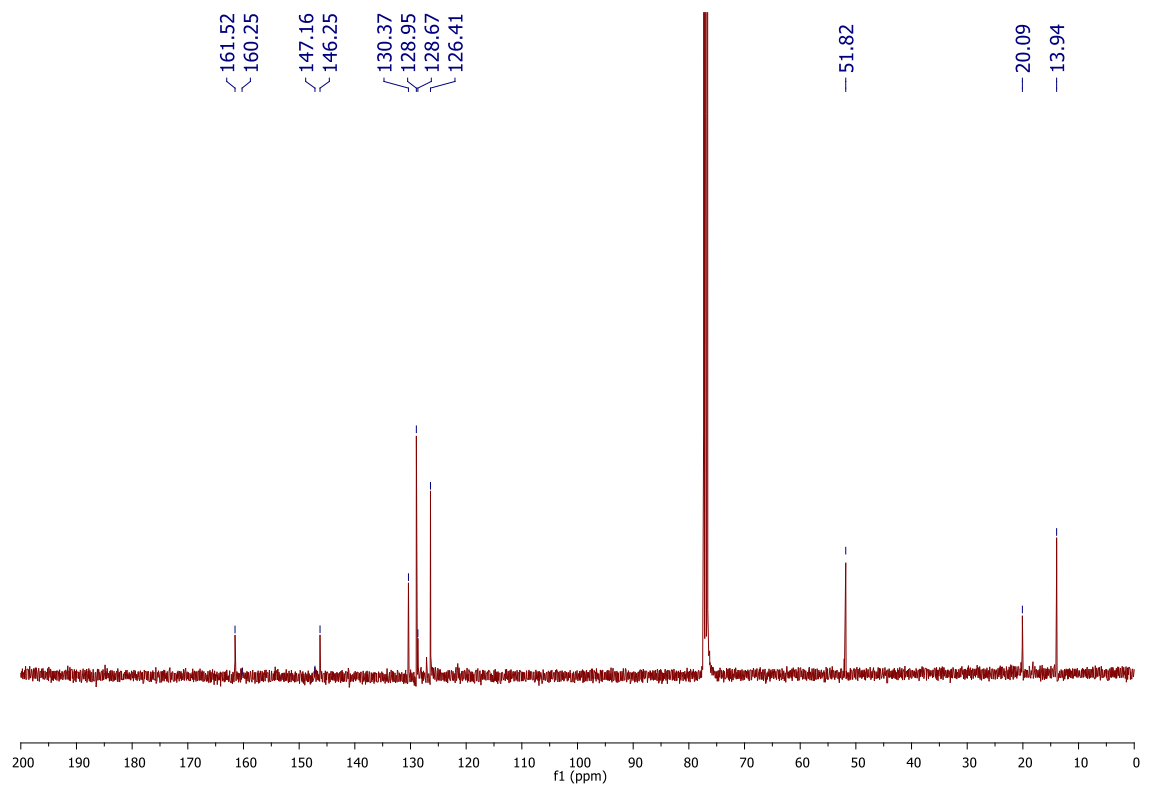

**14. General procedure for the synthesis of thiazoles 14a–d by basic treatment of 3-amino-2,3-dihydrothiazoles 13a–d and DD 2a.** To a magnetically stirred solution of 3-amino-2,3-dihydrothiazoles **13a–d** (0.5 mmol) in MeCN (10 mL), DD **2a** (1.0 mmol) and K<sub>2</sub>CO<sub>3</sub> (1.5 mmol) were added and then the reaction mixture was refluxed for 1 hour, until the TLC analysis revealed the disappearance of the starting reagent **13** and the formation of thiazoles **14a–d**. After the filtration of K<sub>2</sub>CO<sub>3</sub>, the solvent was removed in vacuo; the so-formed products **14** were purified by silica gel column chromatography using cyclohexane/ethyl acetate mixtures as eluent and then were crystallized from ethyl acetate/petroleum ether.

**15. Spectral data of thiazoles 14a–d.**

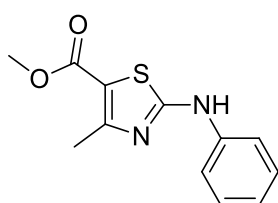

**Methyl 4-methyl-2-(phenylamino)thiazole-5-carboxylate (14a).**<sup>6</sup> The compound was obtained as white solid (101.6 mg, 82%); mp: 96–98 °C; <sup>1</sup>H NMR (400 MHz, CDCl<sub>3</sub>, 25 °C): δ = 2.52 (s, 3H, CH<sub>3</sub>), 3.73 (s, 3H, OCH<sub>3</sub>), 7.03 (t, *J*=7.2 Hz, 1H<sub>ar</sub>), 7.34 (t, *J*=8.0 Hz, 2H<sub>ar</sub>), 7.60 (d, *J*=8.0 Hz, 2H<sub>ar</sub>), 10.68 (s, 1H, NH); <sup>13</sup>C NMR (100 MHz, CDCl<sub>3</sub>, 25 °C): δ = 17.2 (q), 51.1 (q), 108.4 (s), 118.0 (d), 122.5 (d), 129.0 (d), 140.0 (s), 158.8 (s), 162.2 (s), 165.0 (s); IR (nujol): ν<sub>max</sub> = 3232, 1653, 1634 cm<sup>-1</sup>; MS *m/z* (ESI): 249.03 (M + H<sup>+</sup>); anal. calcd. for C<sub>12</sub>H<sub>12</sub>N<sub>2</sub>O<sub>2</sub>S (248.30): C 58.05, H 4.87, N 11.28; found: C 57.91, H 4.91, N 11.35.

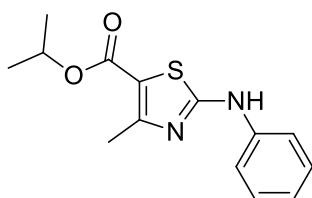

**Methyl 4-methyl-2-(phenylamino)thiazole-5-carboxylate (14b).** The compound was obtained as white solid (109.2 mg, 79%); mp: 101–103 °C; <sup>1</sup>H NMR (400 MHz, CDCl<sub>3</sub>, 25 °C): δ = <sup>1</sup>H NMR (400 MHz, CDCl<sub>3</sub>, 25 °C): δ = 1.31 (d, *J*=6.4 Hz, 6H, OCH(CH<sub>3</sub>)<sub>2</sub>), 2.53 (s, 3H, CH<sub>3</sub>), 5.15 (ep, *J*=6.4 Hz, 1H, OCH(CH<sub>3</sub>)<sub>2</sub>), 7.18 (t, *J*=7.2 Hz, 1H<sub>ar</sub>), 7.34–7.43 (m, 4H<sub>ar</sub>), 8.29 (brs, 1H, NH); <sup>13</sup>C NMR (100 MHz, CDCl<sub>3</sub>, 25 °C): δ = 17.2 (q), 22.0 (q), 68.2 (d), 110.1 (s), 120.3 (d), 124.8 (d), 129.7 (d), 139.2 (s), 157.6 (s), 162.0 (s), 167.8 (s); IR (nujol): ν<sub>max</sub> = 3175, 1657, 1634 cm<sup>-1</sup>; MS *m/z* (ESI): 277.41 (M + H<sup>+</sup>); anal. calcd. for C<sub>14</sub>H<sub>16</sub>N<sub>2</sub>O<sub>2</sub>S (276.35): C 60.85, H 5.84, N 11.58; found: C 60.94, H 5.80, N 11.63.

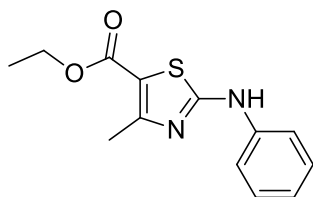

**Ethyl 4-methyl-2-(phenylamino)thiazole-5-carboxylate (14c).**<sup>7</sup> The compound was obtained as white solid (85.3 mg, 65%); mp: 134–136 °C; <sup>1</sup>H NMR (400 MHz, CDCl<sub>3</sub>, 25 °C): δ = 1.34 (t, *J*=7.2 Hz, 3H, OCH<sub>2</sub>CH<sub>3</sub>), 2.56 (s, 3H, CH<sub>3</sub>), 4.28 (q, *J*=7.2 Hz, 2H, OCH<sub>2</sub>CH<sub>3</sub>), 6.96 (brs, 1H, NH), 7.17–7.21 (m, 1H<sub>ar</sub>), 7.33–7.36 (m, 2H<sub>ar</sub>), 7.39–7.43 (m, 2H<sub>ar</sub>); <sup>13</sup>C NMR (100 MHz, CDCl<sub>3</sub>, 25 °C): δ = 14.4 (q), 17.2 (q), 60.7 (t), 109.6 (s), 120.2 (d), 124.8 (d), 129.7 (d), 139.1 (s), 158.0 (s), 162.4 (s), 167.8 (s); IR (nujol): ν<sub>max</sub> = 3200, 3166, 1698 cm<sup>-1</sup>; MS *m/z* (ESI):

263.21 ( $M + H^+$ ); anal. calcd. for  $C_{13}H_{14}N_2O_2S$  (262.33): C 59.52, H 5.38, N 10.68; found: C 59.38, H 5.41, N 10.59.

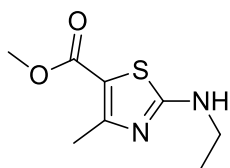

**Methyl 2-(ethylamino)-4-methylthiazole-5-carboxylate (14d).** The compound was obtained as white solid (51.2 mg, 51%); mp: 105–107 °C;  $^1H$  NMR (400 MHz,  $DMSO-d_6$ , 25 °C):  $\delta$  = 1.14 (t,  $J=7.2$  Hz, 3H,  $OCH_2CH_3$ ), 2.40 (s, 3H,  $CH_3$ ), 3.23 (dq,  $J=7.2$  Hz,  $J=5.2$  Hz, 2H,  $CH_2$ ), 3.68 (s, 3H,  $OCH_3$ ), 8.32 (t,  $J=5.2$  Hz, 1H,  $NH$ );  $^{13}C$  NMR (100 MHz,  $CDCl_3$ , 25 °C):  $\delta$  = 14.0 (q), 17.2 (q), 40.0 (t), 51.2 (q), 106.3 (s), 159.8 (s), 162.3 (s), 169.7 (s); IR (nujol):  $\nu_{max}$  = 3221, 1709, 1639  $cm^{-1}$ ; MS  $m/z$  (ESI): 201.27 ( $M + H^+$ ); anal. calcd. for  $C_8H_{12}N_2O_2S$  (200.06): C 47.98, H 6.04, N 13.99; found: C 48.06, H 5.98, N 13.92.

16.  $^1\text{H}$  and  $^{13}\text{C}$  spectra of thiazoles 14a–d.

Methyl 4-methyl-2-(phenylamino)thiazole-5-carboxylate (14a).<sup>6</sup>

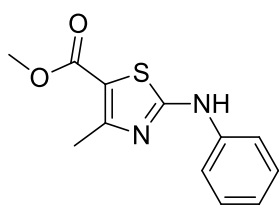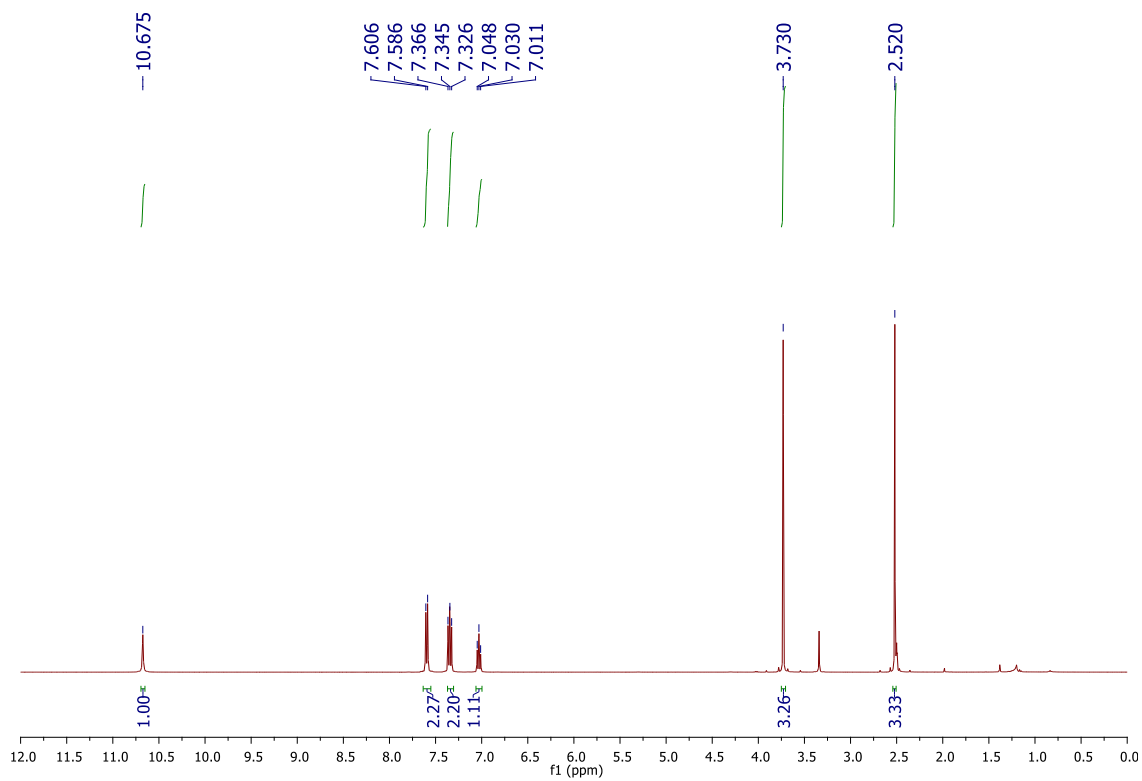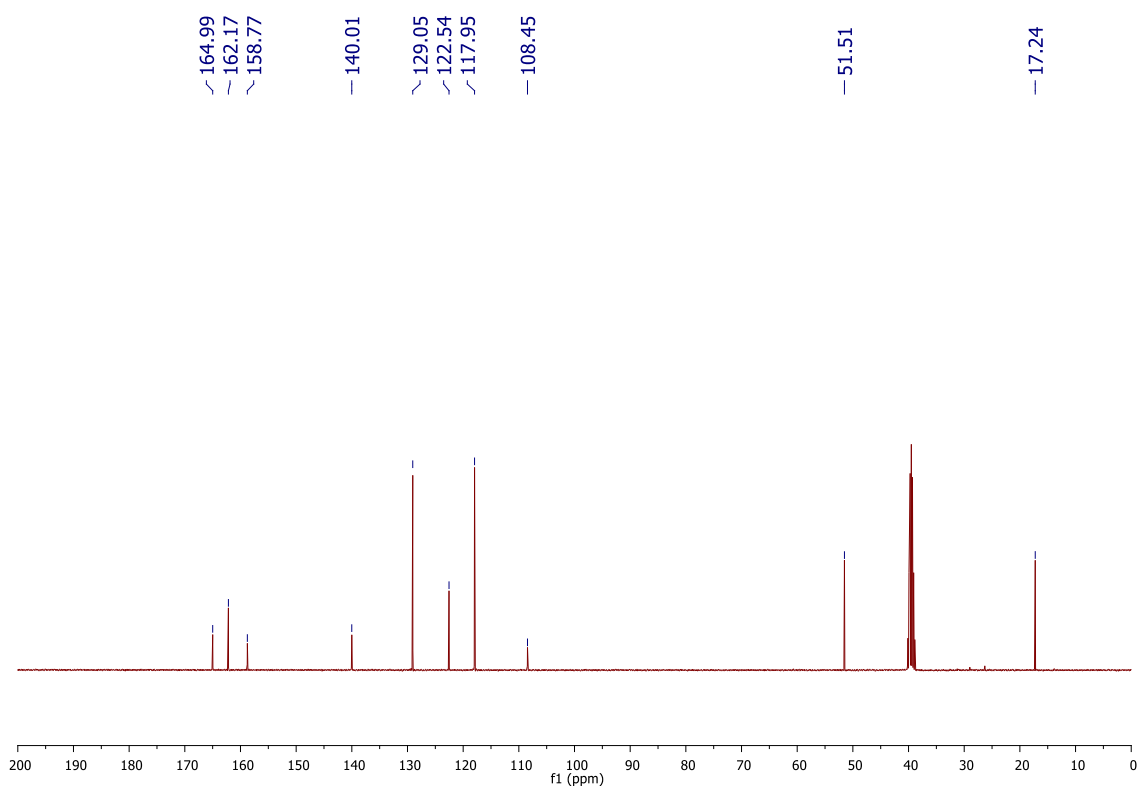

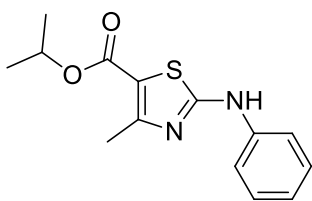

Methyl 4-methyl-2-(phenylamino)thiazole-5-carboxylate (14b).

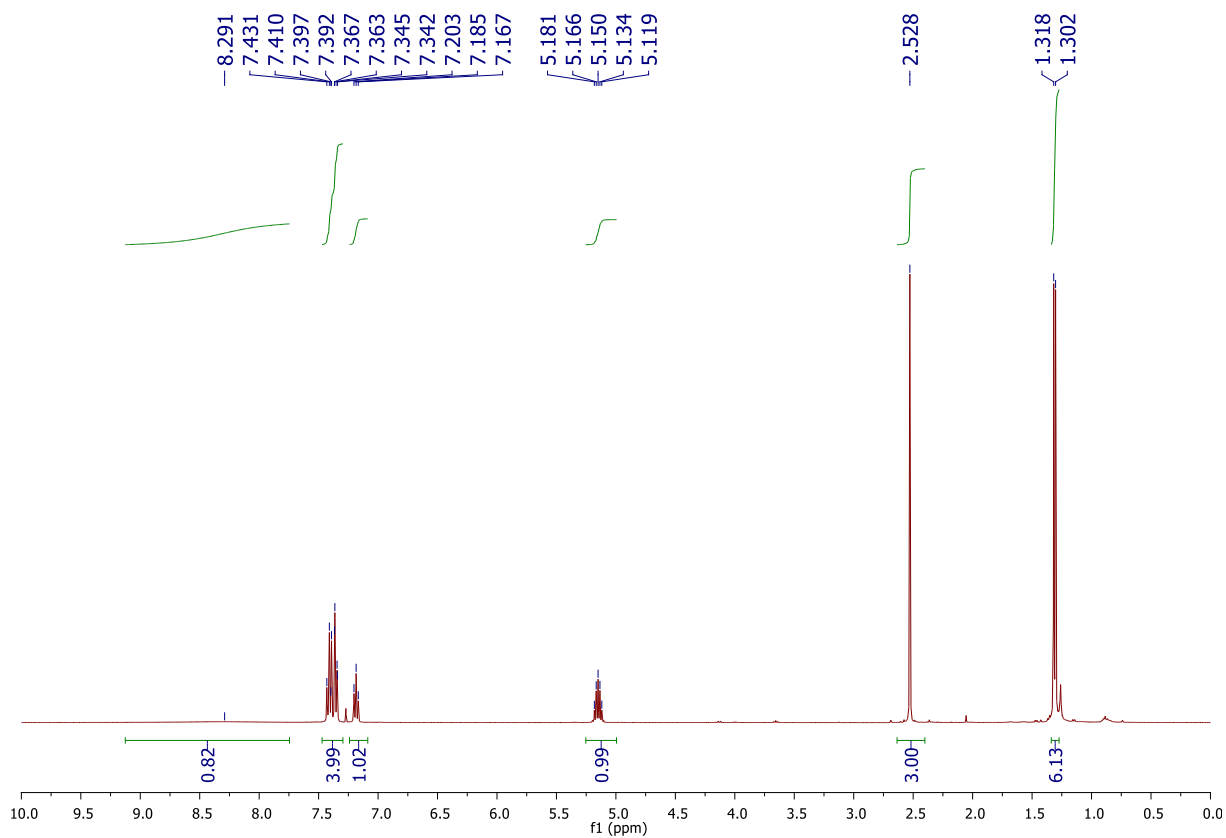

~167.81  
~162.01  
~157.61

— 139.22  
~129.68  
~124.84  
~120.29

— 110.09

— 68.23

— 21.99  
— 17.17

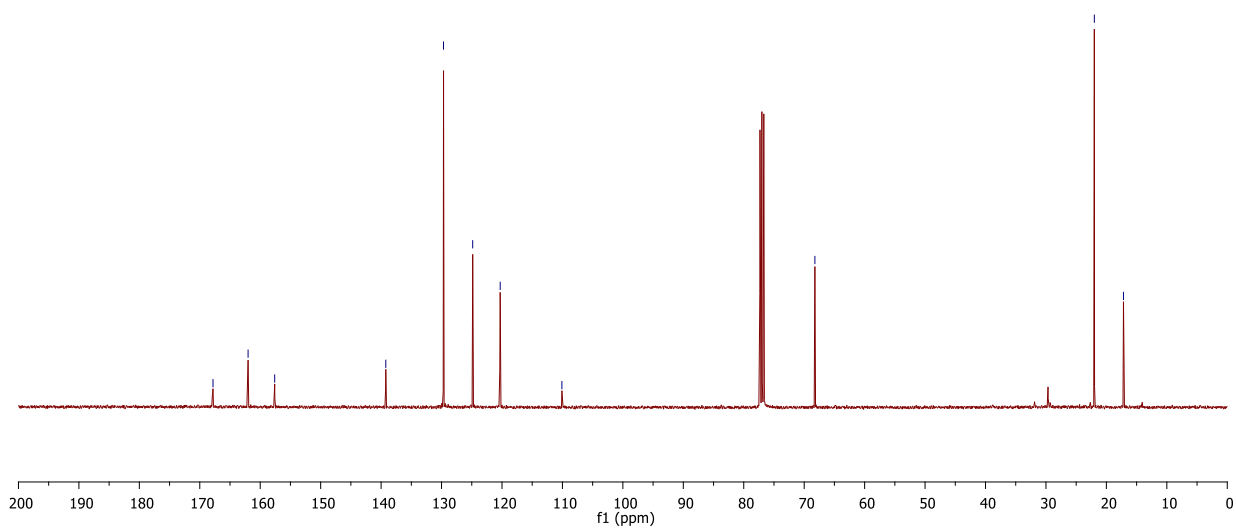

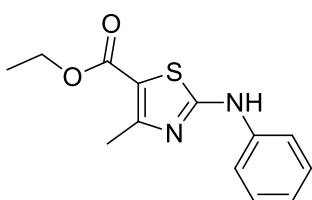

**Ethyl 4-methyl-2-(phenylamino)thiazole-5-carboxylate (14c).<sup>7</sup>**

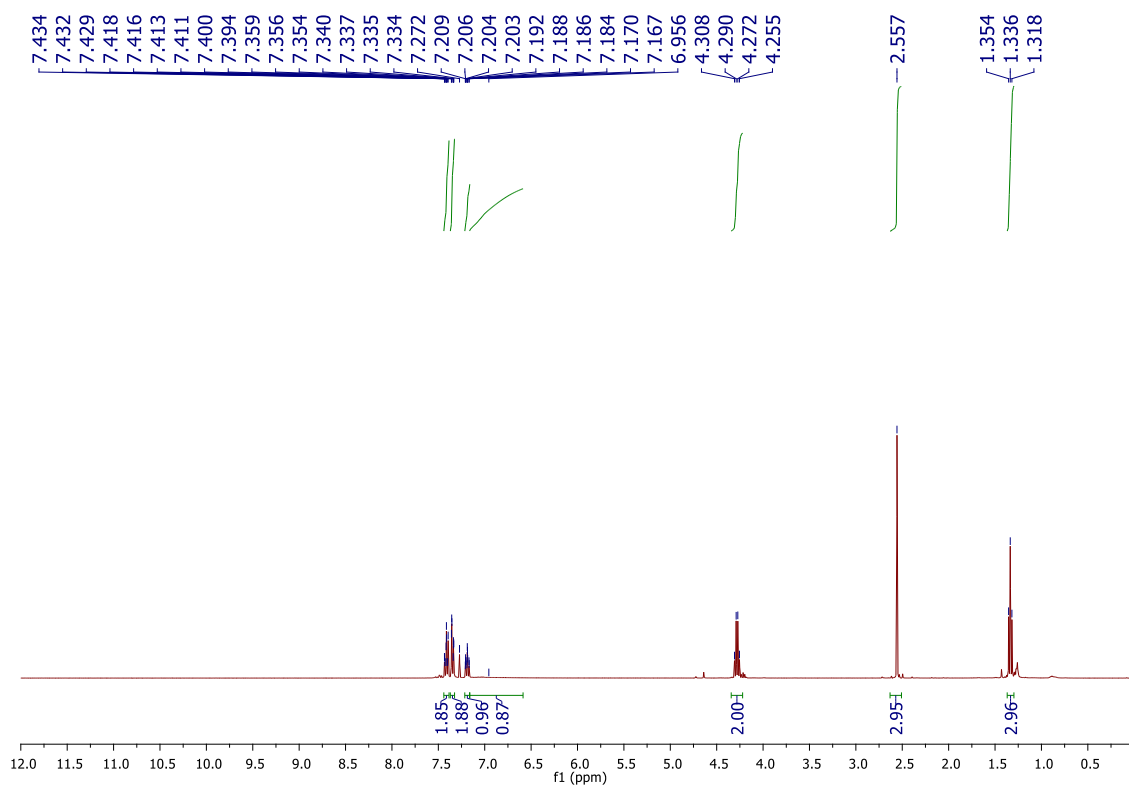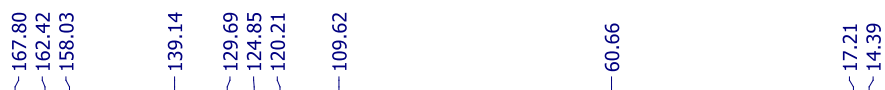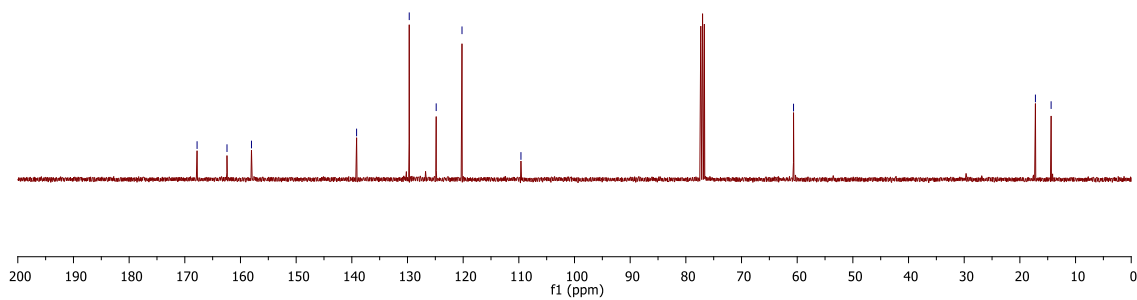

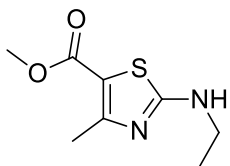

Methyl 2-(ethylamino)-4-methylthiazole-5-carboxylate (14d).

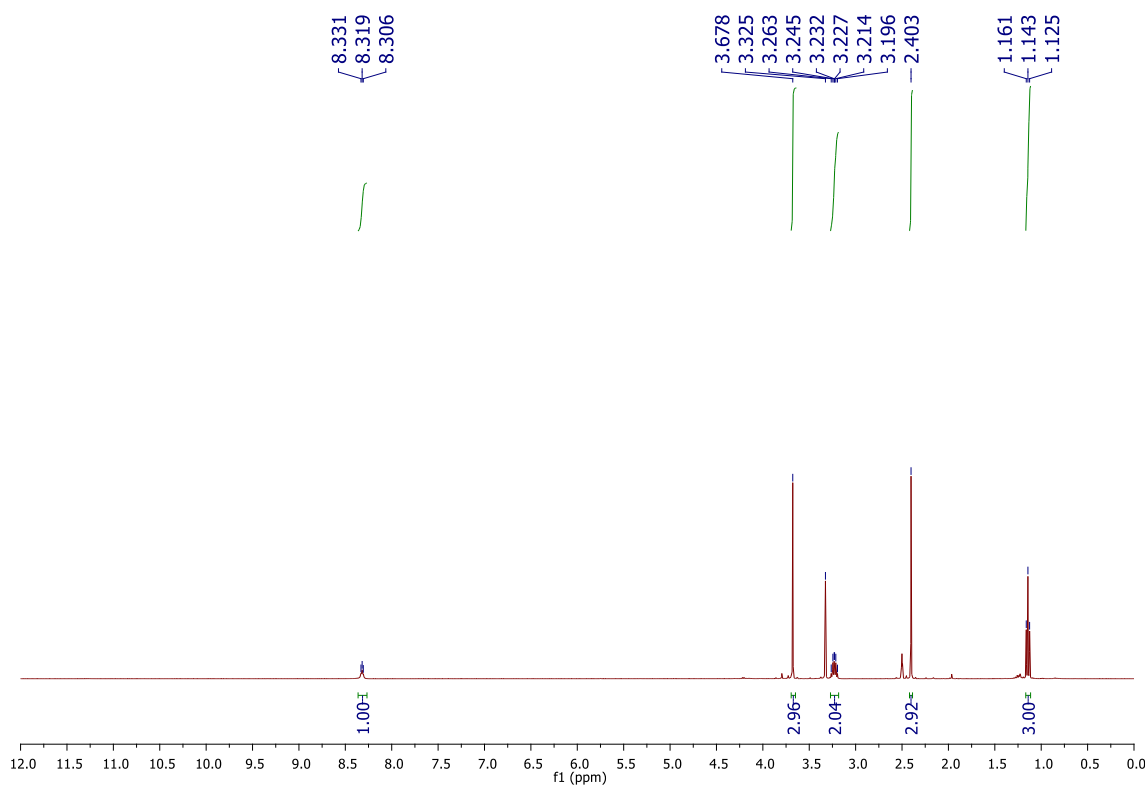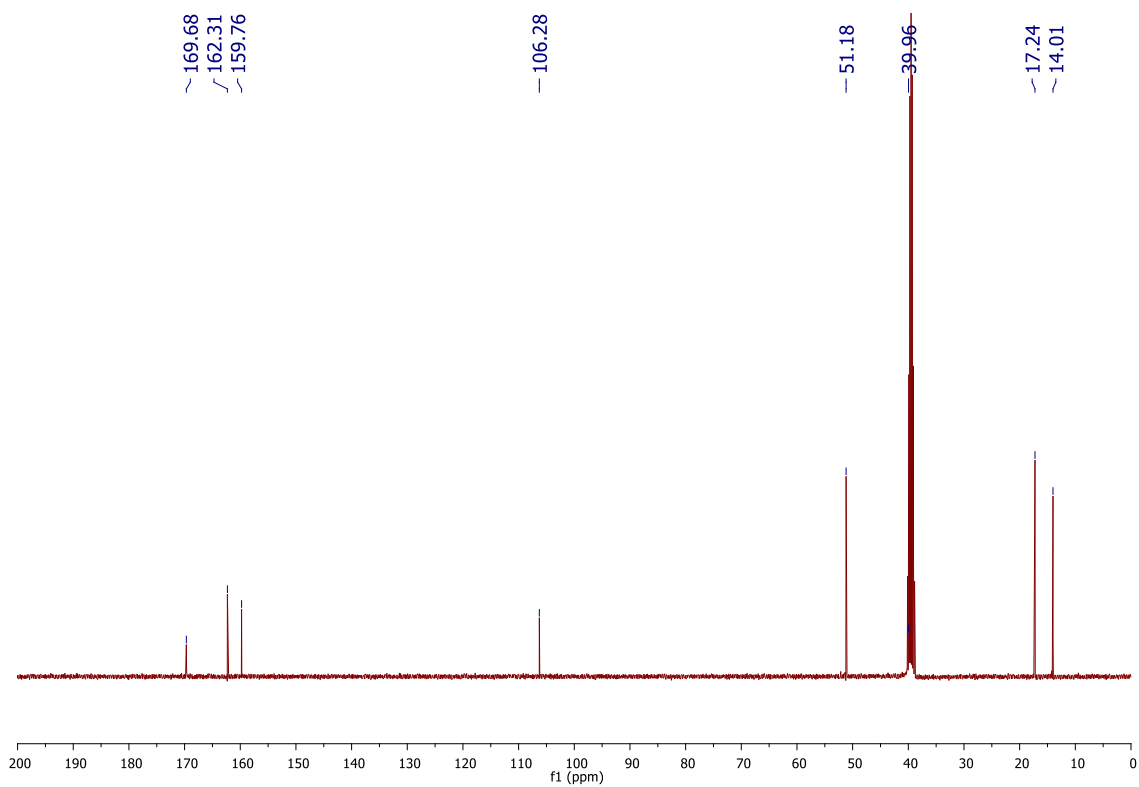

**17. Synthesis of *N*-dialkylated 1-amino-1*H*-bis-pyrrol-2-one **15a** by treatment of 1-amino-1*H*-bis-pyrrole **9a** under Magnus' conditions (see Section 2)**

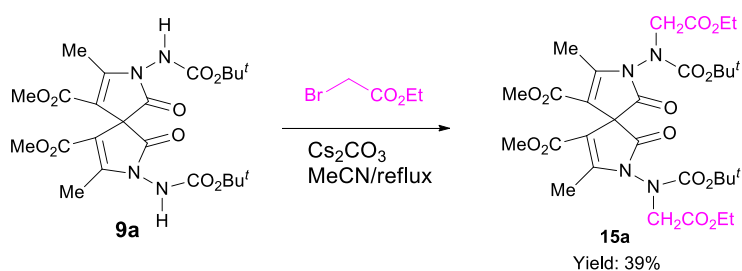

**Scheme 1:** Synthesis of *N*-dialkylated 1-amino-1*H*-bis-pyrrol-2-one **15a** by treatment of 1-amino-1*H*-bis-pyrrole **9a** under Magnus' conditions.

**18. Spectral data of *N*-dialkylated 1-amino-1*H*-bis-pyrrol-2-one **15a**.**

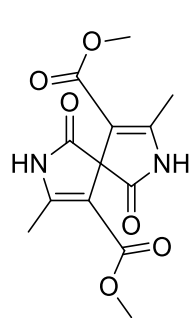

**Dimethyl 3,8-dimethyl-1,6-dioxo-2,7-diazaspiro[4.4]nona-3,8-diene-4,9-dicarboxylate (15a).** The compound was obtained as yellow solid (92.5 mg, 63%); mp: 140–142 °C;  $^1\text{H}$  NMR (400 MHz,  $\text{DMSO-}d_6$ , 25 °C):  $\delta$  = 2.32 (s, 6H, 2 $\text{CH}_3$ ), 3.54 (s, 6H, 2 $\text{OCH}_3$ ), 10.64 (s, 2H,  $\text{NH}$ );  $^{13}\text{C}$  NMR (100 MHz,  $\text{CDCl}_3$ , 25 °C):  $\delta$  = 13.4 (q), 50.7 (q), 64.8 (s), 105.6 (s), 156.3 (s), 162.8 (s), 173.2 (s); IR (nujol):  $\nu_{\text{max}}$  = 3313, 3252, 1760, 1739, 1713, 1704  $\text{cm}^{-1}$ ; MS  $m/z$  (ESI): 295.11 ( $\text{M} + \text{H}^+$ ); anal.

calcd. for  $\text{C}_{13}\text{H}_{14}\text{N}_2\text{O}_6$  (294.08): C 53.06, H 4.80, N 9.52; found: C 53.18, H 4.75, N 9.44.



19.  $^1\text{H}$  and  $^{13}\text{C}$  spectra of of *N*-dialkylated 1-amino-1*H*-bis-pyrrol-2-one 15a.

Dimethyl 3,8-dimethyl-1,6-dioxo-2,7-diazaspiro[4.4]nona-3,8-diene-4,9-dicarboxylate (15a).

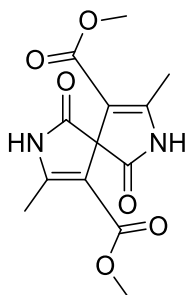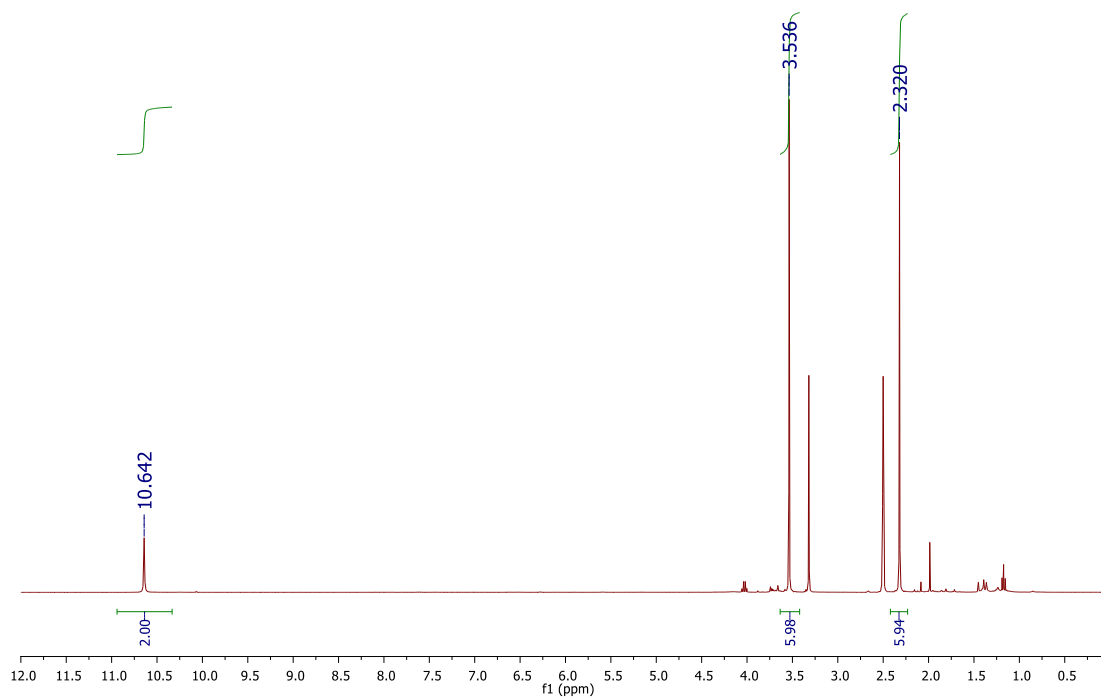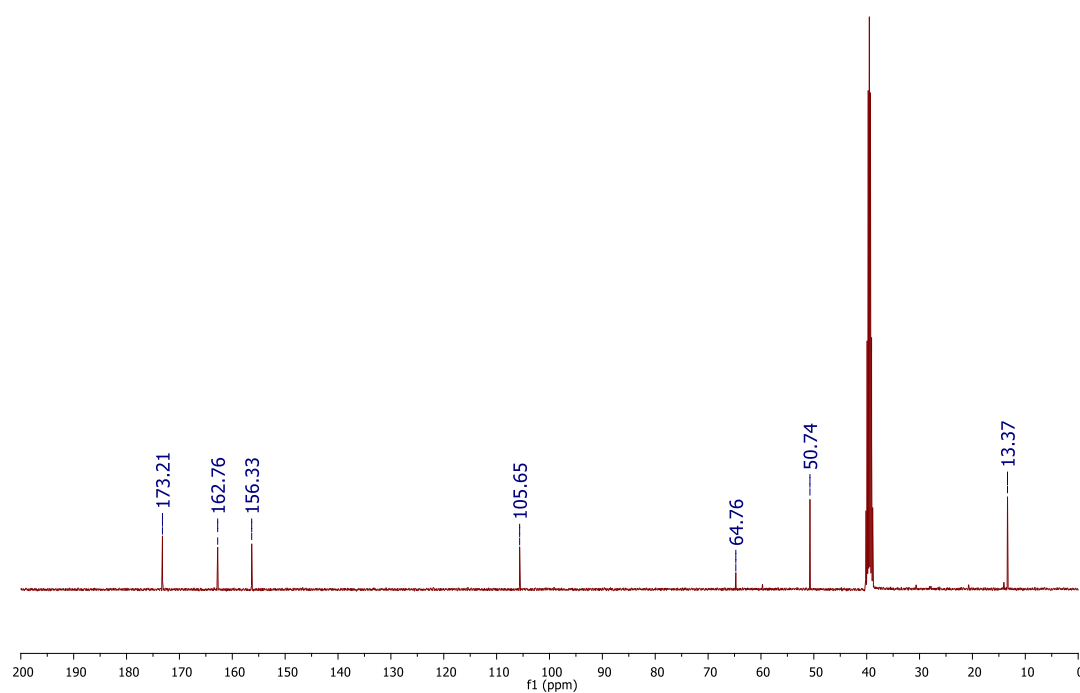

**20. Synthesis of 1*H*-imidazole 12a, by treatment of 1-amino-1*H*-imidazole 11a under Magnus' conditions (see Section 2)**

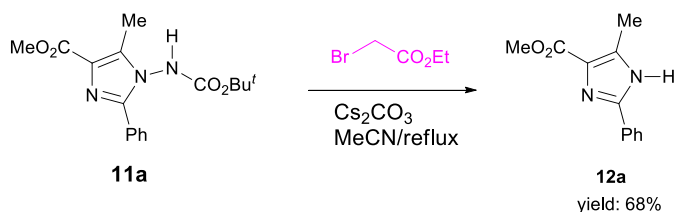

**Scheme 2.** Synthesis of 1*H*-imidazole **12a**, by treatment of 1-amino-1*H*-imidazole **11a** under Magnus' conditions.

**21. Synthesis of *N*-alkylated 2,3-dihydrothiazole 16a and of *N*-alkylated 2-aminothiazole 17a, by treatment of 3-amino-2,3-dihydrothiazole 13a under Magnus' conditions.**

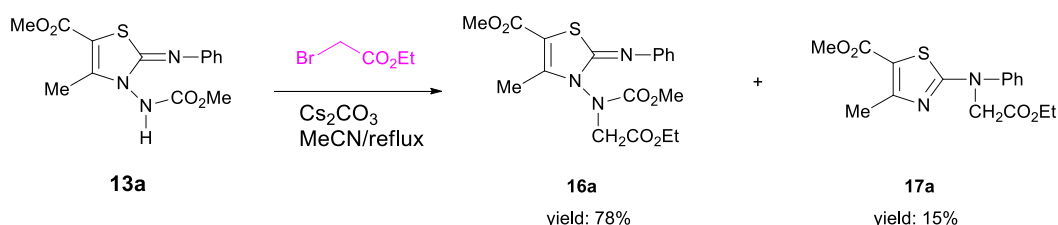

**Scheme 3.** Synthesis of *N*-alkylated 2,3-dihydrothiazole **16a** and of *N*-alkylated 2-aminothiazole **17a**, by treatment of 3-amino-2,3-dihydrothiazole **13a** under Magnus' conditions.

**22. Spectral data of *N*-alkylated 2,3-dihydrothiazole 16a and of *N*-alkylated 2-aminothiazole 17a.**

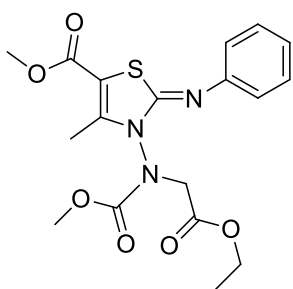

**Methyl 3-((2-ethoxy-2-oxoethyl)(methoxycarbonyl)amino)-4-methyl-2-(phenylimino)-2,3-dihydrothiazole-5-carboxylate (16a).** The compound was obtained as colorless oil (158.8 mg, 78%);  $^1\text{H}$  NMR (400 MHz,  $\text{CDCl}_3$ , 25 °C):  $\delta$  = 1.28–1.33 (m, 3H,  $\text{OCH}_2\text{CH}_3$ ), 2.67 (s, 3H,  $\text{CH}_3$ ), 3.77, 3.79, 3.80 and 3.88 (4brs, 6H,  $2\text{OCH}_3$ ), 4.17–4.31 (m, 3H,  $\text{OCH}_2\text{CO}$  and  $\text{OCH}_2\text{CH}_3$ ), 4.89–5.05 (m, 1H,  $\text{OCH}_2\text{CO}$ ), 7.02–7.11 (m,  $3\text{H}_{\text{ar}}$ ), 7.34 (t,  $J=8.0$  Hz,  $2\text{H}_{\text{ar}}$ );  $^{13}\text{C}$  NMR (100 MHz,  $\text{CDCl}_3$ , 25 °C):  $\delta$  = 12.6 (q), 14.1 (q), 51.4 (q), 51.9 (q), 54.5 (t), 54.6 (t), 61.5 (t), 61.6 (t), 97.5 (s), 121.2 (d), 121.3 (d), 124.1 (d), 124.3 (d), 129.3 (d), 129.5 (d), 147.7 (s), 148.0 (s), 148.5 (s), 152.4 (s), 155.3 (s), 156.4 (s), 162.0 (s), 168.4 (s); IR (nujol):  $\nu_{\text{max}}$  = 1749, 1734, 1653, 1637  $\text{cm}^{-1}$ ; MS  $m/z$  (ESI): 408.09 ( $\text{M} + \text{H}^+$ ); anal. calcd. for  $\text{C}_{18}\text{H}_{21}\text{N}_3\text{O}_6\text{S}$  (407.12): C 53.06, H 5.20, N 10.31; found: C 52.94, H 5.24, N 10.27.

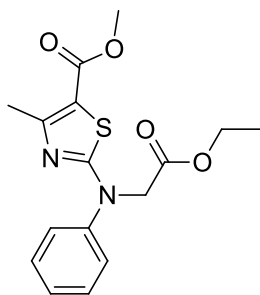

**Methyl 2-((2-ethoxy-2-oxoethyl)(phenyl)amino)-4-methylthiazole-5-carboxylate (17a).**

The compound was obtained as white solid (25.2 mg, 15%); mp: 112–114 °C;  $^1\text{H}$  NMR (400 MHz,  $\text{CDCl}_3$ , 25 °C):  $\delta$  = 1.28 (t,  $J=7.6$  Hz, 3H,  $\text{OCH}_2\text{CH}_3$ ), 2.56 (s, 3H,  $\text{CH}_3$ ), 3.74 (s, 3H,  $\text{OCH}_3$ ), 4.23 (q,  $J=7.6$  Hz, 2H,  $\text{OCH}_2\text{CH}_3$ ), 4.64 (s, 2H,  $\text{CH}_2\text{CO}$ ), 7.36–7.40 (m, 1 $\text{H}_{\text{ar}}$ ), 7.44–7.53 (m, 4 $\text{H}_{\text{ar}}$ );  $^{13}\text{C}$  NMR (100 MHz,  $\text{CDCl}_3$ , 25 °C):  $\delta$  = 14.2 (q), 17.5 (q), 51.4 (q), 53.6 (t), 61.4 (t), 110.6 (s), 126.8 (d), 128.4 (d), 130.2 (d), 144.3 (s), 160.0 (s), 163.0 (s), 169.1 (s), 170.6 (s); IR (nujol):  $\nu_{\text{max}}$  = 1723, 1653, 1644  $\text{cm}^{-1}$ ; MS  $m/z$  (ESI): 335.27 ( $\text{M} + \text{H}^+$ ); anal. calcd. for  $\text{C}_{16}\text{H}_{18}\text{N}_2\text{O}_4\text{S}$  (334.39): C 57.47, H 5.43, N 8.38; found: C 57.34, H 5.48, N 8.47.

23.  $^1\text{H}$  and  $^{13}\text{C}$  spectra of *N*-alkylated 2,3-dihydrothiazole 16a and of *N*-alkylated 2-aminothiazole 17a.

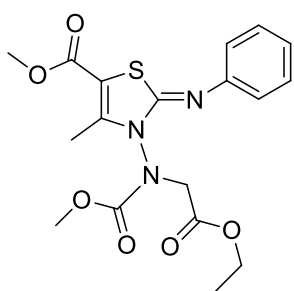

Methyl 3-((2-ethoxy-2-oxoethyl)(methoxycarbonyl)amino)-4-methyl-2-(phenylimino)-2,3-dihydrothiazole-5-carboxylate (16a).

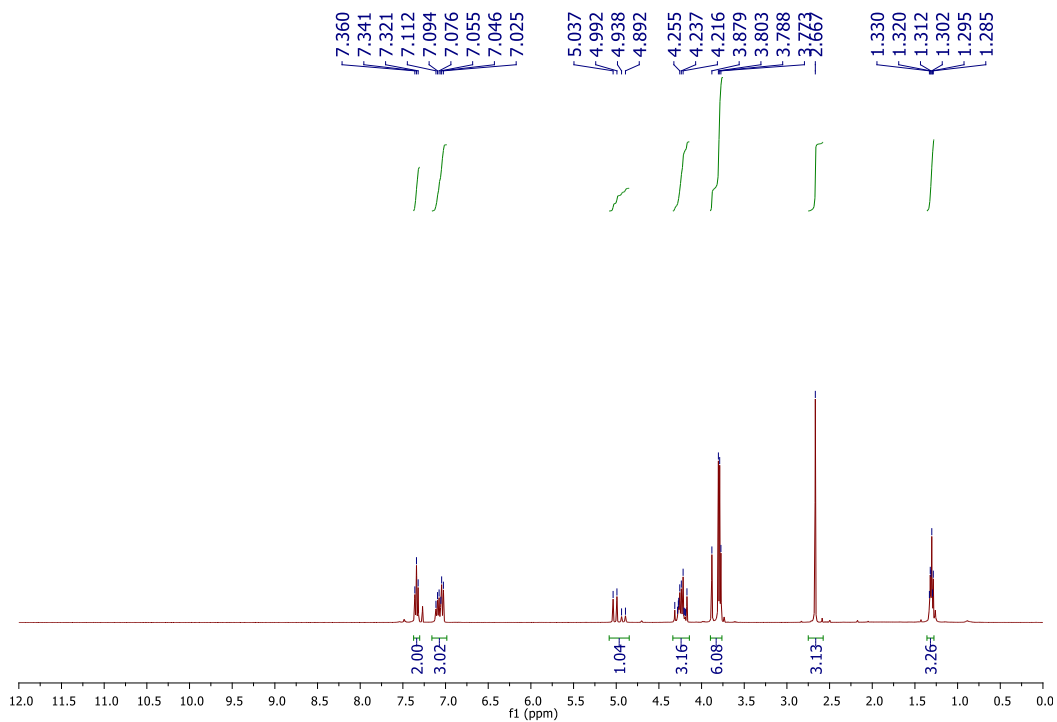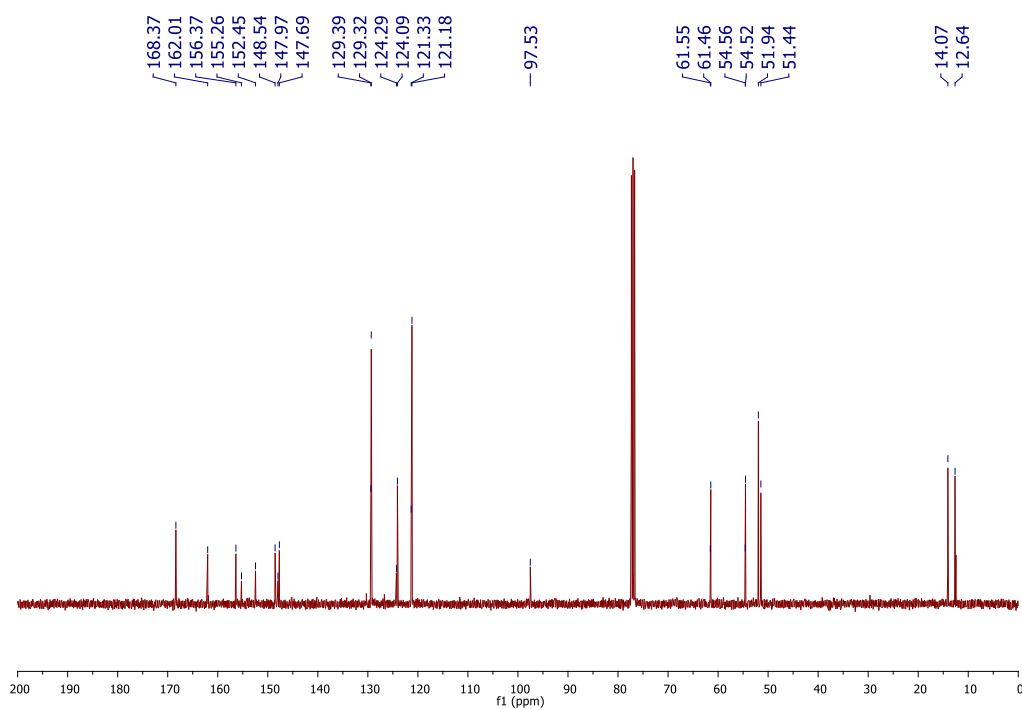

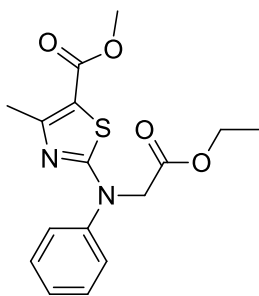

**Methyl 2-((2-ethoxy-2-oxoethyl)(phenyl)amino)-4-methylthiazole-5-carboxylate (17a).**

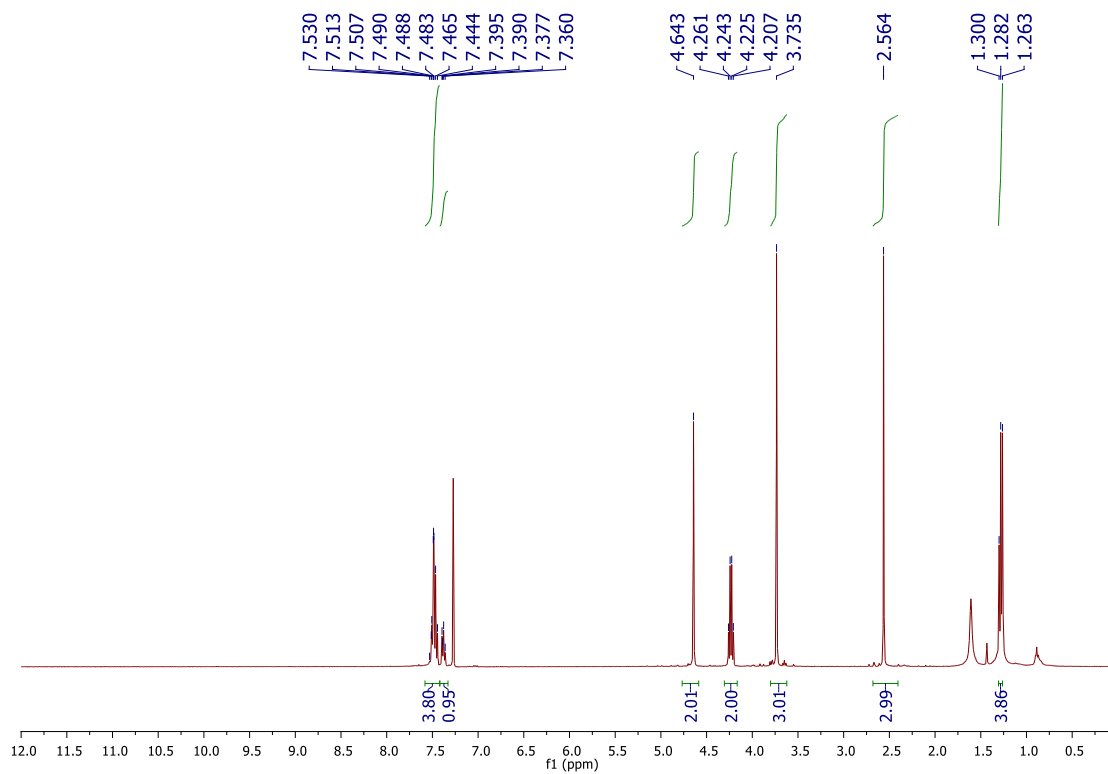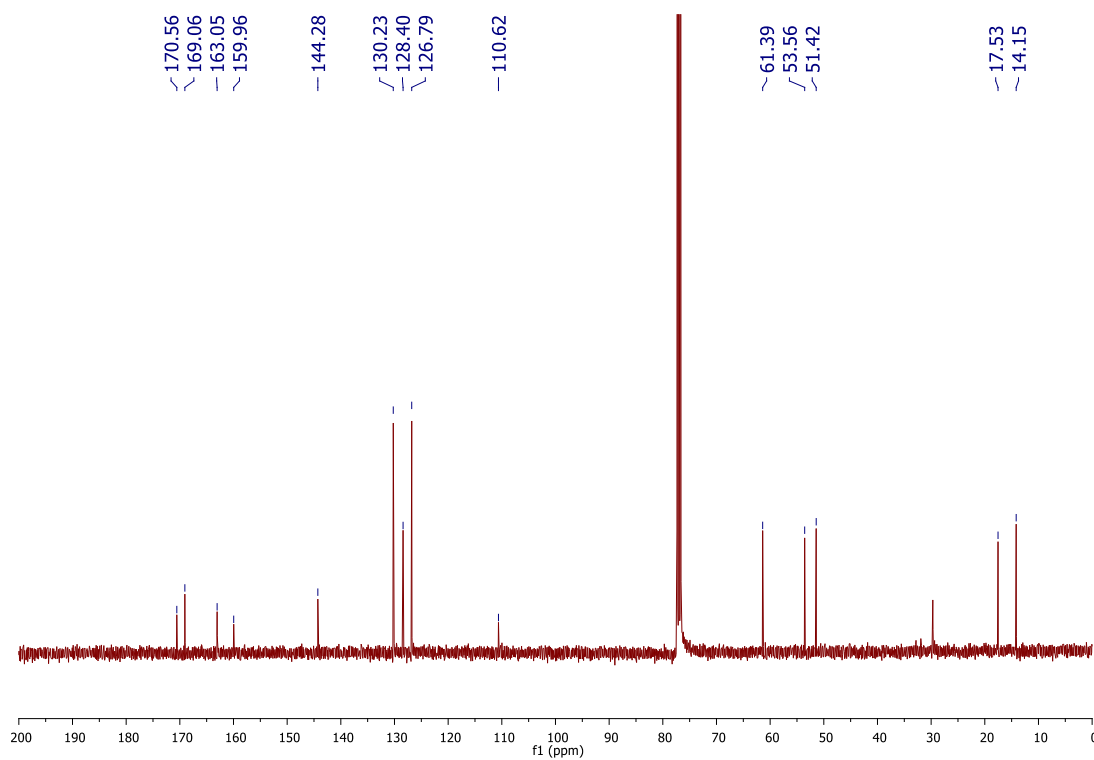

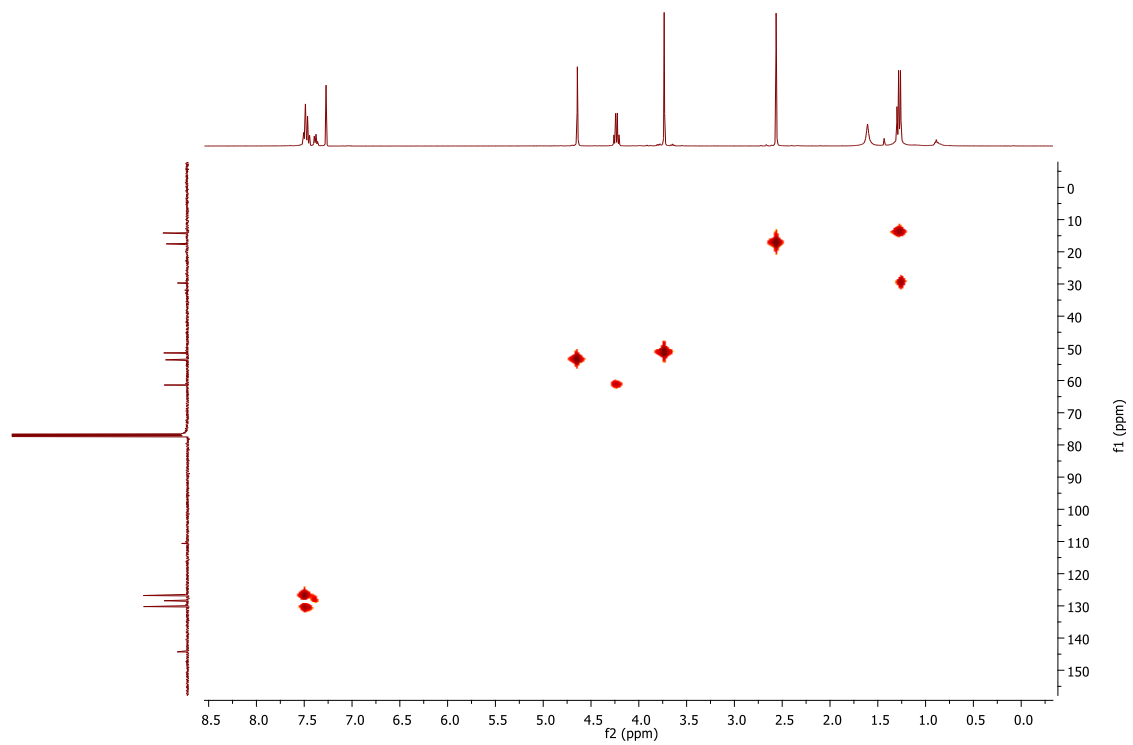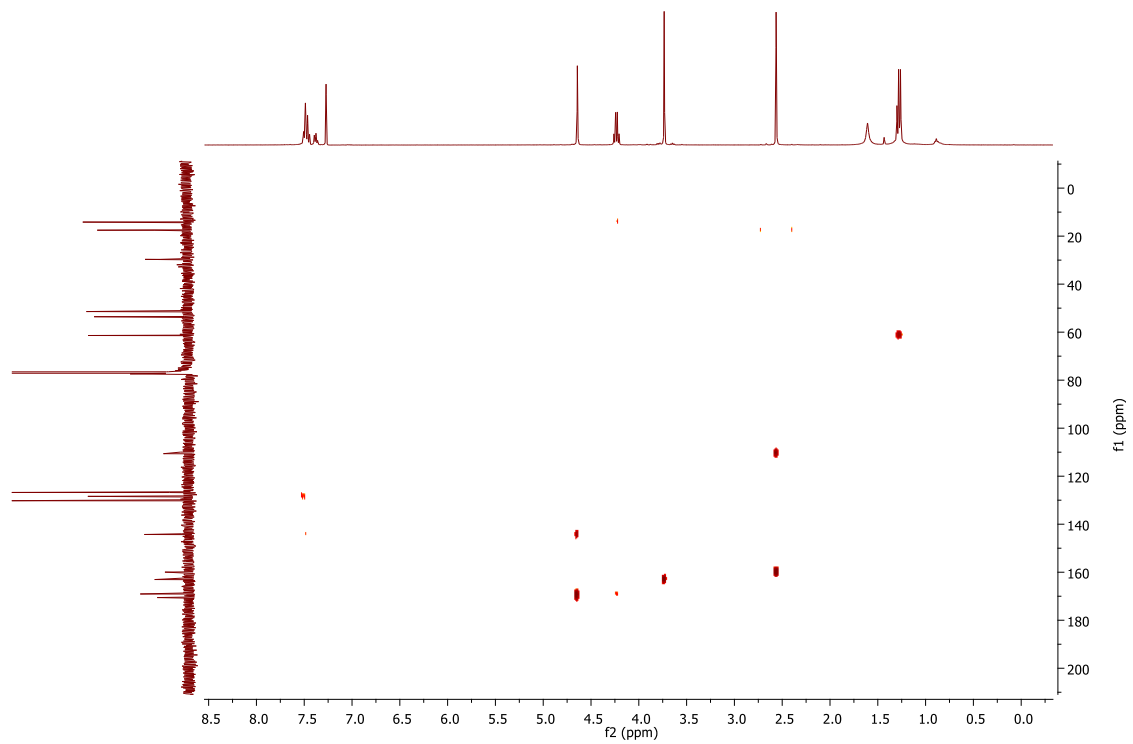

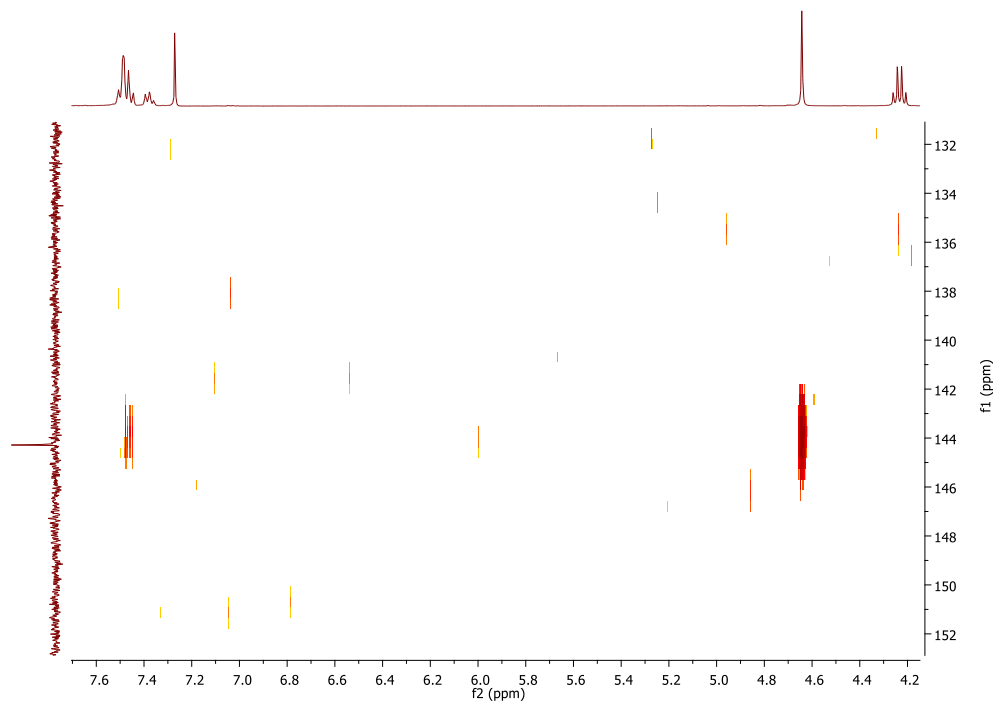

## 24. References

- (1) S. Sommer, *Tetrahedron, Lett.*, 1977, **18**, 117–120.
- (2) L. Preti, O. A. Attanasi, E. Caselli, G. Favi, C. Ori, P. Davoli, F. Felluga and F. Prati, *Eur. J. Org. Chem.*, 2010, 4312–4320.
- (3) (a) S. Yamamoto, N. Matsunaga, T. Hitaka, M. Yamada, T. Hara, J. Miyakazi, T. Santou, M. Kusaka, M. Yamaoka, N. Kanzaki, et al., *Bioorg. Med. Chem.*, 2012, **20**, 239–250; (b) F. Boberg, K. H. Garburg, K. J. Goerlich, E. Pipereit and M. Ruhr, *Liebigs Annalen der Chemie*, 1985, 239–250.
- (4) (a) J.-Y. Wang, P. Liu and W. Yu, *Synlett*, 2009, 2529–2533; (b) M. Galezowski and D. T. Gryko, *J. Org. Chem.*, 2006, **71**, 5942–5950; (c) I. Papoutsis, S. Spyroudis, and A. Varvoglis, *Tetrahedron*, 1998, **54**, 1005–1012.
- (5) (a) P. Gao, J. Wang, Z. Bai, M.-J. Fan, D.-S. Yang and Z.-H. Zheng, *Org. Lett.*, 2018, **20**, 3627–3630; (b) M. W. Moon, *J. Org. Chem.*, 1977, **42**, 2219–2223.
- (6) I. I. Roslan, K.-H. Ng, M. A. Gondal, C. Basheer, M. A. Dastageer, S. Jaenicke and G. K. Chuah, *Adv. Synth. Catal.*, 2018, **360**, 1584–1589.
- (7) (a) V. S. C. de Andrade and M. C. S. de Mattos, *Synthesis*, 2018, **50**, 4867–4874; (b) G. Meng, M. Wang, A. Zheng, J. Dou and Guo, *Green Chem. Lett. Rev.*, 2014, **7**, 46–49; (c) M. Romero-Ortega, A. Aviles, R. Cruz, A. Fuentes, R. M. Gomez and A. Plata, *J. Org. Chem.*, 2000, **65**, 7244–7247.
